# Supplementary material for: Impact of one or two visits strategy on hypertension burden estimation in HYDY, a population-based cross-sectional study: implications for healthcare resource allocation decision making
Source: PubMed Central journal article supplement — BMJ Open. 2012 Aug 8;2(4):e001062. doi: 10.1136/bmjopen-2012-001062 (PMC3425947; doi:10.1136/bmjopen-2012-001062), 2012-08-08
Supplement: bmjopen-2012-001062.draft_revisions.pdf [file bmjopen-2012-001062.draft_revisions.pdf]

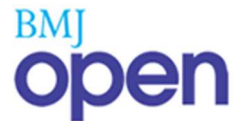

**Impact of one or two visits strategy on hypertension burden estimation in Yemen population aged 15 to 69: population based cross-sectional study.**

|                                 |                                                                                                                                                                                                                                                                                                                                                                                                                                                                                                                                                                                                                                                                                                                                                                                                                                    |
|---------------------------------|------------------------------------------------------------------------------------------------------------------------------------------------------------------------------------------------------------------------------------------------------------------------------------------------------------------------------------------------------------------------------------------------------------------------------------------------------------------------------------------------------------------------------------------------------------------------------------------------------------------------------------------------------------------------------------------------------------------------------------------------------------------------------------------------------------------------------------|
| Journal:                        | <i>BMJ Open</i>                                                                                                                                                                                                                                                                                                                                                                                                                                                                                                                                                                                                                                                                                                                                                                                                                    |
| Manuscript ID:                  | bmjopen-2012-001062                                                                                                                                                                                                                                                                                                                                                                                                                                                                                                                                                                                                                                                                                                                                                                                                                |
| Article Type:                   | Research                                                                                                                                                                                                                                                                                                                                                                                                                                                                                                                                                                                                                                                                                                                                                                                                                           |
| Date Submitted by the Author:   | 22-Feb-2012                                                                                                                                                                                                                                                                                                                                                                                                                                                                                                                                                                                                                                                                                                                                                                                                                        |
| Complete List of Authors:       | Modesti, Pietro; University of Florence, Department of Medical and Surgical Critical Care<br>Rapi, Stefano; Azienda Ospedaliero Universitaria Careggi (AOUC), Bamoshmoosh, Mohamed; University of Science and Technology, Science and Technology University Hospital,<br>Baldereschi, Marzia; Italian National Research Council,<br>Masseti, Luciano; Italian National Research Council,<br>Gensini, Gian Franco; University of Florence, Department of Medical and Surgical Critical Care<br>Zhao, Dong; Capital Medical University Affiliated Beijing Anzhen Hospital, Beijing Institute of Heart, Lung and Blood Vessel Diseases, Department of Epidemiology<br>Al-Hidabi, Dawood; University of Science and Technology,<br>Al Goshae, Husni; University of Science and Technology, Science and Technology University Hospital, |
| <b>Primary Subject Heading</b>: | Global health                                                                                                                                                                                                                                                                                                                                                                                                                                                                                                                                                                                                                                                                                                                                                                                                                      |
| Secondary Subject Heading:      | Cardiovascular medicine, Epidemiology, Health policy, Public health                                                                                                                                                                                                                                                                                                                                                                                                                                                                                                                                                                                                                                                                                                                                                                |
| Keywords:                       | Hypertension < CARDIOLOGY, EPIDEMIOLOGY, PREVENTIVE MEDICINE, PUBLIC HEALTH, Diabetes & endocrinology < INTERNAL MEDICINE, Cardiology < INTERNAL MEDICINE                                                                                                                                                                                                                                                                                                                                                                                                                                                                                                                                                                                                                                                                          |
|                                 |                                                                                                                                                                                                                                                                                                                                                                                                                                                                                                                                                                                                                                                                                                                                                                                                                                    |

SCHOLARONE™  
Manuscripts

1  
2  
3 **Impact of one or two visits strategy on hypertension burden estimation in Yemen population**  
4 **aged 15 to 69: population based cross-sectional study.**  
5  
6  
7  
8  
9

10 Pietro Amedeo Modesti, Professor of Internal Medicine <sup>1,2,3</sup>, [pamodesti@unifi.it](mailto:pamodesti@unifi.it),

11 Stefano Rapi, Director of Chemical Laboratory <sup>2</sup>, [rapis@aou-careggi.toscana.it](mailto:rapis@aou-careggi.toscana.it),

12 Mohamed Bamoshmoosh, Professor of Medicine <sup>4</sup>, [bamoshmoosh@hotmail.it](mailto:bamoshmoosh@hotmail.it),

13 Marzia Baldereschi, Epidemiologist <sup>5</sup>, [baldereschi@in.cnr.it](mailto:baldereschi@in.cnr.it),

14 Luciano Massetti, Computer Science Engineer <sup>5</sup>, [l.massetti@ibimet.cnr.it](mailto:l.massetti@ibimet.cnr.it),

15 Gian Franco Gensini, Professor of Internal Medicine <sup>1,2,3</sup>, [gianfranco.gensini@unifi.it](mailto:gianfranco.gensini@unifi.it),

16 Dong Zhao, Professor of Epidemiology <sup>6</sup>, [deezhao@vip.sina.com](mailto:deezhao@vip.sina.com),

17 Dawood Al-Hidabi, Rector University <sup>4</sup>, [d.alhidabi@ust.edu.ye](mailto:d.alhidabi@ust.edu.ye),

18 Husni Al Goshae, Professor of Medicine <sup>4</sup>, [algoshae@gmail.com](mailto:algoshae@gmail.com),  
19  
20  
21  
22  
23  
24  
25  
26  
27  
28  
29

30 <sup>1</sup> Department of Medical and Surgical Critical Care, University of Florence, viale Morgagni 85, 50134  
31 Florence, Italy; <sup>2</sup> Azienda Ospedaliero Universitaria Careggi (AOUC), Largo Giovanni Alessandro  
32 Brambilla 3, 50134 Florence, Italy; <sup>3</sup> Fondazione Don Carlo Gnocchi, Centro di S.Maria degli Ulivi,  
33 124, V. Impruneta 50023 Pozzolatico Florence, Italy; <sup>4</sup> University of Science and Technology, Science  
34 and Technology University Hospital, sixty St., P.O. Box 13061, Sana'a, Yemen; <sup>5</sup> Italian National  
35 Research Council, Via Madonna del Piano 10, 50019 Sesto Fiorentino, Florence, Italy; <sup>6</sup> Department of  
36 Epidemiology, Capital Medical University Affiliated Beijing Anzhen Hospital, Beijing Institute of  
37 Heart, Lung and Blood Vessel Diseases, No. 2 Anzhen Street, Chaoyang District, Beijing 100029,  
38 China.  
39  
40  
41  
42  
43  
44  
45  
46

47 **Correspondence to:** P A Modesti [pamodesti@unifi.it](mailto:pamodesti@unifi.it)

48 **Word count: 3876**  
49  
50  
51  
52  
53  
54  
55  
56  
57  
58  
59  
60

**Contributorship Statement:**

PAM, SR, MoB, and MaB drafted the manuscript. PAM, SR, MoB, MaB, LM, GFG, DAH, and HAG were involved in the conception and design of the study. DAH, and HAG were part of the project management team that coordinated data collection for the study. PAM, and MaB wrote the statistical analysis plan; PAM, SR, and LM conducted the main analyses and provided statistical advice; DZ provided substantial contributions to analysis and interpretation of data and revised the draft paper. All authors had access to all data sources, contributed to the interpretation of results, commented on the report, and approved the final version for publication. PAM is the guarantor.

## Summary

### 1. Article Focus

To investigate the effect on hypertension prevalence estimation and on CV risk stratification of taking blood pressure at one or two visits in a cross-sectional national survey.

To identify the characteristics of subjects who are excluded from the final diagnosis when restricting the diagnostic criteria.

### 2. Key Messages

The present study clarify that although there is a large discrepancy (35%) in the estimation of hypertension prevalence on the basis of one visit or two visits, only 1.9% of subjects classified at high or very high CV risk at visit 1 moved to average, low, or moderate CV risk categories after two visits.

Subjects excluded from the final diagnosis of hypertension, had rates of proteinuria and self-reported CV disease comparable with normotensive subjects and the general population.

According to present data the choice of one or two visits is not relevant when a strategy that allows for a more comprehensive framework of CV risk is implemented.

### 3. Strength and Limitations

This study utilised data from nationally representative survey conducted with a door to door approach and a high response level in a developing country.

Laboratory investigations were performed with the use of dry chemistry. However the long distance to get to a service laboratory requires shipments under special conditions, often resulting in deterioration and spoilage of the specimen.

## ABSTRACT

**Context.** The prevalence of hypertension in developing countries is coming closer to values found in developed countries. However, surveys usually rely on readings taken at a single visit, the option to implement the diagnosis on readings taken at multiple visits, being limited by costs.

**Objective.** To investigate the impact of one or two visits strategy on hypertension burden estimation and CV risk stratification.

**Design.** Population-based cross-sectional survey with triplicate blood pressure readings taken on two separate home-visits.

**Setting.** Rural and urban locations in three areas of Yemen (capital, inland, and coast).

**Participants.** A nationally representative sample of the Yemen population aged 15 to 69 years (5063 men and 5179 women), with an overall response rate of 92% in urban and 94% in rural locations.

**Main outcome measure.** Hypertension diagnosed as systolic blood pressure  $\geq 140$  mmHg and/or diastolic blood pressure  $\geq 90$  mmHg and/or self-reported use of antihypertensive drugs.

**Results.** Hypertension prevalence (age-standardized to the WHO world population 2001) based on fulfilling the same criteria on both visits (11.3%; 95% CI 10.7-11.9), was 35% lower than estimation based on the first visit (17.3%; 16.5-18.0). Advanced age, blood glucose  $\geq 7$  mmol/L, or proteinuria  $\geq 1+$  at dipstick test at visit one, were significant predictors of confirmation at visit two. The 959 participants found to be hypertensive at visit one or at visit two only and thus excluded from the final diagnosis, had a rate of proteinuria (5.0%; 3.8-6.5) comparable to rates of the general population (6.1%; 5.6-6.6), and of subjects normotensive at both visits (5.6%; 5.1-6.2). Only 1.9% of Yemen population classified at high or very high CV risk at visit one moved to average, low, or moderate CV risk categories after two visits.

**Conclusions.** Hypertension prevalence based on readings obtained after two visits is 35% lower than estimation based on the first visit, subjects were excluded from final diagnosis belonging to low CV risk classes.

### Subject headings

hypertension (high blood pressure); hypertension diagnosis; cardiovascular disease risk factors; epidemiology; survey;

## INTRODUCTION

The World Health Organization has been indicating since 2001 that cardiovascular (CV) disease is the first cause of death worldwide (1). More precisely, 80% of CV death are now occurring in low- and middle-income countries (2, 3). Surveys performed in developing countries are revealing that changing lifestyle and urbanization are associated with a growing prevalence of hypertension (4) which is coming closer to values found in developed countries (5). All these surveys rely on readings taken at a single visit, the option to implement the diagnosis on readings taken at multiple visits, as recommended by guidelines for clinical practice (6,7), being limited due to costs. Diagnostic criteria based on readings collected at a single visit, might however lead to include subjects with high BP variability and episodic hypertension, with a final overestimation of a true hypertension prevalence (8,9). Although high BP variability potentially increases the risk of future CV events (10), treatment decision is uncertain. Conversely resource allocation in developing countries requires sound data. Finally, although the association between hypertension and target organ damage was recently reported to be independent by the diagnostic criteria (9), the CV risk characteristics of subjects which are impacted more from the two survey strategies, being either included among hypertensives after a single visit survey or excluded when restricting the diagnostic criteria, is currently unknown.

In the Hypertension and Diabetes in Yemen (HYDY) survey, subjects received urine dipstick test for proteinuria combined with triplicate blood pressure readings performed during two separate home-visits as recommended by guidelines for the clinical diagnosis of hypertension (6,7). The aim of present study is 1) to compare the differences on prevalence, awareness, treatment, and control rates, and on CV risk stratification when the definition of hypertension rely on data collected either at a single or at two visits carried out in different dates and 2) to identify the characteristics of subjects who are excluded from the final diagnosis when restricting the diagnostic criteria.

## METHODS

### Study Sites and Study Population

The Yemen population was estimated to be more than 21 million in 2007 (11). A multi-stage stratified sampling method was used. In the first stage, Yemen was stratified into three regions, the capital area, the inland, and the coastal area. In addition to the governorate of Sana'a, the governorate of Taizz in the inland, and the governorates of Al Hudaydah and Hadramaut on the coast were selected to be representative of the geographic, economic, and climatic characteristics of the country. In the second stage, rural and city regions were identified from each study area. In the third stage, districts were arbitrarily identified within each urban and rural region, boundaries being defined using local maps or in consultation with the local health workers. The total number of districts within each study area (20 in the capital area, 12 in the inland, and 8 in the coastal area) was proportional to the estimated population size of the area. In the final stage, due to the lack of a national population register, a cluster of 300 participants was made for each district, participants being equally-allocated by gender and age-group (6-14 years; 15-24; 25-34; 35-44; 45-54; 55-69) to a total of twelve strata. All male and female subjects aged 6 through 69 years who lived permanently in the study areas were eligible. Pregnant women were excluded. A common set of rules for making a cluster was followed. Briefly, a sampling frame was established following enumeration of houses counting from the centre to the suburbs of the district and the first house to be surveyed was chosen at random by choosing a number on the list and selecting the corresponding house. Investigators then continued to call at every second address, always turning left. A household was defined as a group of people who usually live under the same roof and share meals. If more than one household was present in the same dwelling one was randomly selected. All of the eligible subjects in the same household were invited to take part in study. One hundred and eighty-two subjects refused to participate, and 12257 were evaluated between February 2008 and March 2009. Results obtained in subjects aged  $\geq 15$  years (5063 men and 5179 women) are reported in the present study.

The study was approved by the Ethical Committee of the University of Science and Technology, Sana'a, Yemen (Ref. 1-2007). Districts Leaders and local Chiefs also consented to the survey. Informed consent was obtained from every participant before data collection. No incentives were offered to study participants. Participants with untreated conditions identified during the examination were referred to a primary health-care provider.

### Data collection

1  
2  
3 The survey was performed following the three different levels of the World Health Organization  
4 Stepwise Approach to Chronic Disease Risk Factor Surveillance (STEPS)(12), which included  
5 questionnaire, physical measurements, and biochemical measurements, using standardized methods.  
6  
7 The burden of hypertension in the population was assessed by taking triplicate BP measurements on  
8  
9 two visits, separated by few days. Data collection was conducted at home by centrally trained survey  
10  
11 teams composed by two investigators of the opposite gender.  
12  
13

14 Community sensitization activities preceded each survey round, including local council briefings  
15  
16 with the chiefs and elders of the villages. During the first visit (visit 1) the head of the household or  
17  
18 spouse and the participant were informed about the objectives, and procedural details of the survey.  
19  
20 Privacy of information was assured. After obtaining consent, study questionnaire was administered.  
21  
22 The study questionnaire included questions about demographics, lifestyle, and medical history (WHO  
23  
24 STEPS-Instrument v2.0)(12). Participants were asked if they had been advised to change their diet  
25  
26 (“special prescribed diet”), or to lose weight (“advice or treatment to lose weight”), or quit smoking  
27  
28 (“advice or treatment to stop smoking”), or do exercise (“advice to start or do more exercise”),  
29  
30 attributed to hypertension, by indication of a health professional. Close-ended questions were asked to  
31  
32 find out if they had been seen by a traditional healer over the last year or if they had been using herbal  
33  
34 or traditional remedies attributed to high blood pressure. “Known ischaemic heart disease” (IHD) was  
35  
36 defined as a person with history of heart attack requiring hospitalization, or a person with physician-  
37  
38 diagnosed IHD who was taking medication as confirmed by the survey team. “Known stroke” was  
39  
40 defined as a person with a history of abrupt-onset weakness or paralysis on one side of the body, with  
41  
42 or without a history of hospitalization, or a person with physician-diagnosed stroke and currently  
43  
44 experiencing weakness or paralysis on one side of the body.  
45  
46

47 The mid-arm circumference was measured to use the appropriate cuff size (small, medium, and  
48  
49 large for mid-arm circumferences of 17-22 cm, 22-32 cm, and 32-42 cm respectively). Three  
50  
51 measurements of BP and pulse rate were taken at 2-min intervals on the dominant arm after a rest of at  
52  
53 least 15 min, in the seated position (7). Readings were obtained using a clinically validated  
54  
55 semiautomatic sphygmomanometer (HEM 705 IT; Omron Matsusaka Co Ltd, Japan). The average of  
56  
57 the last two readings for systolic and diastolic BP were defined as SBP1 and DBP1 respectively.  
58  
59 Anthropometric measurements were taken on standing participants wearing light clothes and without  
60  
61 shoes using standard techniques (13). Body weight was measured to the nearest 0.1 Kg using a spring  
62  
63 balance and height to the nearest 0.5 cm using a stadiometer. Waist and hip circumference was  
64  
65 measured to the nearest 0.1 cm. Finger prick blood samples were then obtained from fasting (>8h)



1  
2  
3 subjects (aged  $\geq 15$  years) to measure glucose (Accutrend system, Roche Diagnostics, Mannheim,  
4 Germany), cholesterol, and triglycerides blood values (MultiCare-in, HPS, Italy) using dry chemistry.  
5 The subject was then asked to void. A midstream specimen of urine was collected and dipstick test  
6 (Auction sticks, A.Menarini Diagnostics, Italy) was immediately performed and read manually to  
7 semiquantitate the occult blood (trace, 1+ to 4+) and protein (trace, 1+ to 4+). A new appointment was  
8 taken for non-fasting participants and for subjects who were menstruating. All subjects were then  
9 visited again within the next ten days by the same survey team using the same measurement devices  
10 and procedures for the second session of BP (SBP2 and DBP2) and fasting glucose (FG2)  
11 measurements.  
12  
13  
14  
15  
16  
17  
18  
19  
20

### 21 **Diagnostic criteria**

22 Arterial hypertension was defined as 1) systolic BP  $\geq 140$  mmHg and/or diastolic BP  $\geq 90$  mmHg  
23 and/or 2) self-reported use of antihypertensive drugs at the time of the interview (7). More precisely the  
24 prevalence of hypertension was based on values measured at the first visit (SBP1 and DBP1), at the  
25 second visit (SBP2 and DBP2), and on fulfilling the same criteria for hypertension on both visits.  
26 Awareness of hypertension was defined as self-report of any prior diagnosis of hypertension by a  
27 health care professional among the population defined as having hypertension. Hypertension treatment  
28 was defined as a self-reported use of antihypertensive drugs within the two weeks preceding the  
29 interview. Hypertension control was defined as systolic BP  $< 140$  mm Hg and diastolic BP  $< 90$  mm Hg.  
30 The proportion of hypertension control was relative to hypertensive treated with drugs.  
31  
32  
33  
34  
35  
36  
37  
38

39 Diabetes mellitus (DM) was defined as 1) fasting glucose (FG)  $\geq 7.0$  mmol/L at the two visits or  
40 2) self-reported use of hypoglycaemic medications at the time of the interview; impaired fasting  
41 glucose (IFG) as  $5.6 \leq \text{FG} < 7.0$  mmol/L in the absence of hypoglycaemic medications;  
42 normal FG as  $\text{FG} < 5.6$  mmol/L at the two visits (14). Overweight and obesity were defined as a body  
43 mass index (BMI) 25.0 to 29.9  $\text{kg/m}^2$ , and  $\geq 30$   $\text{kg/m}^2$  respectively. Abdominal obesity was defined as  
44 waist circumference  $> 102$  cm in men or  $> 88$  cm in women. Gender specific tertiles for BMI and waist-  
45 to-hip (W/H) ratio, were calculated using data of adult subjects without hypertension, normal FG,  
46 cholesterol  $< 5.0$  mmol/L, triglycerides  $< 1.7$  mmol/L, and no protein at urine dipstick test. Resulting  
47 cut-offs were 20.0 and 23.2  $\text{kg/m}^2$  for men and 20.5 and 24.3  $\text{kg/m}^2$  for women for BMI and 0.849 and  
48 0.907 in men and 0.815 and 0.887 in women for W/H ratio. On the basis of cholesterol and  
49 triglycerides assessments subjects were classified as high cholesterol ( $> 5.0$  mmol/l) or high  
50 triglycerides ( $> 1.7$  mmol/l) (7). Results of dipstick urinalysis were classified as no protein (0), protein  
51  
52  
53  
54  
55  
56  
57  
58  
59  
60

1  
2  
3 trace (+/-), or proteinuria ( $\geq+1$ ). A smoker was defined as one who smoked any form of tobacco on a  
4 daily (daily smoker) or a non-daily (occasional smoker) basis. Those who had smoked but had quit  
5 were designated as former smokers, and those who had never smoked at all were designated as never  
6 smokers. On the basis of education level subjects were classified into six levels: 1) illiterate; 2) can  
7 read and write; 3) primary school; 4) preparatory school; 5) secondary; 6) university or post. Fruit and  
8 vegetable consumption were classified as 1)  $\leq 1$  day/week; 2) 2-4 day/week; 3)  $\geq 5$  days/week.  
9  
10 Participants were categorized as sedentary if they walked or cycled for less than 10 min daily, if their  
11 work did not involve intense physical activity, and they did not usually practice any sport or  
12 recreational physical activities.  
13  
14  
15  
16  
17  
18

19 According to the ESH/ESC chart (7) risk stratification (average, low, moderate, high, and very  
20 high added risk categories) was based on the presence of risk factors (average of SBP1/SBP2 and  
21 DBP1/DBP2 graded in five categories; age  $>55$  years for men or  $>65$  years for women; daily smoking;  
22 waist circumference  $>102$  cm in men or  $>88$  cm in women; IFG; triglycerides  $>1.7$  mmol/L; total  
23 cholesterol  $>5.0$  mmol/L), DM, subclinical organ damage (protein trace at dipstick test), and  
24 established renal (proteinuria  $\geq 1+$  at dipstick test) or CV disease (self-reported stroke, myocardial  
25 infarction or peripheral artery disease). The cluster of three out of 4 risk factors among abdominal  
26 obesity, altered fasting plasma glucose, BP  $>130/85$  mmHg, and high triglycerides (as defined above),  
27 was considered as the presence of metabolic syndrome.  
28  
29  
30  
31  
32  
33  
34

35 Measures have been taken to attain complete reliability and to reduce variation to reasonable  
36 limits. All study personnel successfully completed the specific one-week training programme organized  
37 in Sana'a (December 2007) on the aims of the study and the specific methods used to standardize the  
38 procedure for sampling and contacting individuals, questionnaire administration and form filling, BP  
39 measurements using electronic devices, performing blood biochemical assay, performing urine assay,  
40 and data entry into computerized data base. The training program included a pilot testing performed on  
41 a population sample of 400 individuals in urban and rural areas of Sana'a.  
42  
43  
44  
45  
46  
47  
48

### 49 **Statistical methods**

50 A sample size of at least 1,117 subjects was required to achieve a 1% precision around an  
51 estimated prevalence of diabetes of 3% with 95% confidence level (CI). Estimated required sample size  
52 for two-sample comparison of diabetes prevalence of 2.25% vs 3.75% with the assumption of 0.05  
53 alpha (two-sided), 80% power, was 2,161 subjects for each group. Cleaning the data, handling missing  
54 data, and outliers were done according to the guidelines of WHO for STEPS data management (12).  
55  
56  
57  
58  
59  
60

1  
2  
3 Prevalence estimates were calculated for the five age groups in the overall population and by gender.  
4 Data are expressed as mean±SD with 95% CI for continuous variables, and as rates with 95% CI for  
5 categorical variables. Prevalence was also weighted to represent the total Yemen population aged 15-69  
6 years (2008 estimated Yemen population) (11,16), and age-standardized for age ranges 15-69 years  
7 using WHO World Standard Population (17). For hypertension awareness, and treatment the analysis  
8 was done on the subpopulation of hypertensive patients; for hypertension control, analysis was done on  
9 the subpopulation of treated people. As there were no national data available for these two  
10 subpopulations for the purpose of weighting, at this stage of analysis, we did not weight the data.  
11 Prevalence rates were compared using  $\chi^2$  analysis and Risk Ratio (RR) (16). When appropriate, test of  
12 hypothesis was done at significance level 0.05 two sided. Associations between socio-demographic,  
13 anthropometric, and clinical factors and the prevalence of hypertension were explored with logistic  
14 regression analysis, the diagnosis of hypertension being entered as dependent dichotomic variable.  
15 Results of regression analysis are expressed as RR with 95% CI for each independent variable (20). All  
16 analyses were performed with SPSS software, version 17.0 (SPSS).  
17  
18  
19  
20  
21  
22  
23  
24  
25  
26  
27  
28  
29  
30  
31  
32  
33  
34  
35  
36  
37  
38  
39  
40  
41  
42  
43  
44  
45  
46  
47  
48  
49  
50  
51  
52  
53  
54  
55  
56  
57  
58  
59  
60

## RESULTS

### Characteristics of study population

Characteristics of HYDY participants are reported in Table 1. Distribution among age decades and living location (urban, rural) were identical among men and women. Overall, the prevalence of illiterate subjects was higher in women (51%) than in men (19%). The prevalence of obesity and abdominal obesity were also higher in women (13.4%; 95%CI 12.5 to 14.4; and 26.5%; 25.3 to 27.7) than in men (6.9%; 6.2 to 7.6; and 3.4%; 2.9 to 3.9).

All subjects received two visits at home separated by a median interval of 5.36 days (95% CI 5.30 to 5.42; range 1 to 13 days), with no differences between gender. The average of the last two of the three BP and heart rate readings taken at each visit is reported in Table 1. Values measured at visit 2 were lower than values obtained at visit 1 both in men and in women.

### Hypertension rate and diagnostic criteria

Overall the rate of hypertension at visit 1 was 19.1% (95% CI 18.3-19.8), being 15.9% (15.2-16.6) at visit 2. In particular 1307 and 7930 participants were found to be hypertensive and normotensive at both visits respectively; 642 subjects had an hypertension diagnosis at visit 1 only, whereas 317 were hypertensive at visit 2 only (chi-squared test  $P < 0.001$ ). Therefore when the diagnosis was based on fulfilling the same criteria on both visits the estimated hypertension rate was lowered by 33% (12.8%; 12.1-13.4). When data were standardized to the Yemen population (15-69 years) prevalence was 7.7% (95% CI 7.2 to 8.1). This value, considering both the two visits, is lower than estimations obtained when visit 1 (12.8%; 95% CI: 12.2 to 13.4), or visit 2 (10.5%; 95% CI: 9.9 to 11.0) are considered independently (Figure 1). Hypertension prevalence age-standardized to the WHO world population 2001 aged 15-69 years was 11.3% (10.7 to 11.9) when based on both visits and 17.3% (16.5 to 10.0) when based on the first visit (gender specific values are reported in Table 2).

Overall 528 subjects were on antihypertensive treatment. Rates of awareness and treatment importantly varied according to the criteria adopted for hypertension diagnosis being higher when based on the results of both visits. The estimation of control rates was more restrictive when based on the result of both visits than of single visits (Table 2). In both genders the proportion of hypertensive subjects aware of their hypertension, the proportion of subjects under current treatment increased with age. Conversely, as expected, the proportion of treated subjects whose hypertension was controlled decreased with age (Table 2). When excluding individuals already on antihypertensive drug treatment

1  
2  
3 and estimating hypertension prevalence on BP measurements, the rate of hypertension among  
4 participants was 17.2% (16.4-18.0) at visit 1 (n=1425), 12.8% (12.1-13.5) at visit 2 (n=1098), 8.7%  
5 (8.1-9.3) of subjects (n=779) fulfilling the criteria at both visits.  
6  
7  
8  
9

### 10 **Factors affecting misclassification of hypertension at visit one**

11 When considering untreated subjects, 53% out of the 1094 participants who had hypertension  
12 Grade 1 at the first visit, and 24% out of the 239 subjects with hypertension Grade 2, did not fulfil the  
13 criteria for hypertension at visit 2 reassessment. Conversely only 8% out of the 92 untreated  
14 participants with Grade 3 hypertension had normal BP values at visit 2 reassessment. Misclassification  
15 also varied by subject age. The younger the subjects were, the wider the difference was between  
16 estimates based on one or two visits (Table 2). As a result only 43% of men, and 44% of women <35  
17 years of age found to be hypertensive at visit one were hypertensive at both visits. These percentages  
18 were 72% and 76% for men and women aged >45 years of age (Table 3).  
19  
20  
21  
22  
23  
24  
25

26 When characteristics of misclassified participants were compared to untreated subjects with  
27 hypertension diagnosis confirmed at both visits (logistic regression analysis including 1396 subjects),  
28 misclassification was found to be independent by gender, education level, BMI and W/H ratio tertiles.  
29 The probability to have the diagnosis confirmed was directly associated with age decades, grade of  
30 hypertension, provisional diagnosis of diabetes at visit 1 (FG  $\geq 7.0$  mmol/L or self-reported use of  
31 hypoglycaemic medications), and proteinuria  $\geq 1+$  at dipstick test.  
32  
33  
34  
35  
36

37 Rates of proteinuria ( $\geq 1+$  at dipstick test), or the self-report of CV disease (MI,stroke,POAD) at  
38 questionnaire, were comparable among subjects classified as hypertensive at the first, the second, or at  
39 both visits (Table 3). However, the 959 participants found to be hypertensive at visit 1 or at visit 2 only  
40 and thus excluded from the final diagnosis of hypertension (not confirmed), had rates of proteinuria and  
41 self-reported CV disease comparable with normotensive subjects (at both visits) and the general  
42 population (Table 4).  
43  
44  
45  
46  
47  
48

### 49 **Cardiovascular risk stratification after one or two visits**

50 BP readings taken at the first visit (SBP1/DBP1) or average of BP readings taken at the first and  
51 the second visits (SBP1-SBP2/DBP1-DBP2) were used to stratify HYDY participants in the five BP  
52 categories according to ESH/ESC guidelines (7). As indicated by Figure 2 the different prevalence of  
53 hypertension when the diagnosis rely on measurements taken at the first visit or at two visits is mainly  
54 due to misclassification of subjects with Grade 1 hypertension.  
55  
56  
57  
58  
59  
60

1  
2  
3 CV risk stratification according to the ESH/ESC chart (7) using average BP values at visit1 and  
4 at both visits is reported in Table 5. Most people had average or low 10-year CV risk, and a large  
5 fraction (84.3% after visit 1 and 86.2% after two visits) had CV risk <20% (average, low, or moderate).  
6  
7 The age weighted percentage of the population with a CV risk  $\geq 20\%$  (high, or very high CV risk) was  
8  
9 13.8% after visit 1 and 12.0% after two visits (Table 5). Overall, only 1.9% of Yemen population  
10  
11 classified at high or very high CV risk at visit 1 moved to average, low, or moderate CV risk categories  
12  
13 after two visits (Figure 3).  
14  
15  
16  
17  
18  
19  
20  
21  
22  
23  
24  
25  
26  
27  
28  
29  
30  
31  
32  
33  
34  
35  
36  
37  
38  
39  
40  
41  
42  
43  
44  
45  
46  
47  
48  
49  
50  
51  
52  
53  
54  
55  
56  
57  
58  
59  
60

For peer review only

## DISCUSSION

This study provides helpful results to clarify the impact of survey strategy on the final estimation of hypertension burden in developing countries. One of the major contribution is the information that a strategy based on two visits allows to exclude from final diagnosis subjects at low CV risk with a resultant 35% reduction of the estimated prevalence of hypertension. This information is essential for estimating drug costs and budget allocation in national prevention programs.

The fall in BP over repeated readings mainly rely to a transient elevation of BP in persons submitted to BP measurements, and was reported to be inversely related with age and directly related to BP values (8). From a clinical prospective, the uncertainty about the patient's true BP at clinic measurement may cause uncertainty in treatment decisions (18). Therefore, guidelines for clinical practice commonly recommend that the diagnosis of hypertension rely on multiple measurements obtained at different visits (6,7). At population level, the relevant logistic difficulties and personnel costs of a strategy based on two separate visits, and the negative prognostic role of high BP variability and episodic hypertension (10), may sometimes lead to accept the adoption of a single visit strategy. Ignoring the difference in hypertension definition criteria may however lead to erroneous conclusions when comparing results of surveys assessing the prevalence of hypertension, awareness, and control in different countries (19). In two epidemiological studies where the estimation of hypertension prevalence based on two visits was compared with the estimation based on a single visit, the reduction was 12% in a cohort of subjects aged  $62 \pm 11$  years (9), being  $>35\%$  in a cohort of subjects aged  $39 \pm 9$  years (20). In particular, two thirds of men  $<30$  years of age had normal BP values at the second visit (20). In both studies, the majority of subjects misclassified as hypertensive were in the less severe hypertensive grade (9,20). In a recent small surveys the estimation of hypertension prevalence had, as expected, a strong association with the presence of left ventricular hypertrophy independently from diagnostic criteria (one or two visits) (9). However, the most critical issue, the CV risk of subjects excluded from final diagnosis, is still poorly investigated. This information is especially crucial in low resource setting where budget allocation to CV prevention programs might compete with other priorities. HYDY study participants were stratified by cardiovascular risk according to ESH/ESC criteria (7) thus allowing to investigate characteristics of misclassified subjects. Subjects misclassified at first visit most frequently belonged to low or moderate CV risk categories, having a rate of proteinuria comparable to the general population and to subjects found to be normotensive at both visits. Therefore when resources are limited the estimation of hypertension prevalence might be based



1  
2  
3 on only one visit, while resources can be more efficiently used to target high-risk people who will  
4 benefit the most.  
5

6  
7 Heart attack and stroke are preventable either through conventional management of single risk  
8 factors (hypertension), or by applying a total CV risk approach which could permit providers to  
9 focalize drug treatment use only in high risk subjects. CV risk has a continuous relationship with BP  
10 values. In particular, the present study clarify that although there is a large discrepancy (35%) in the  
11 estimation of hypertension prevalence on the basis of one visit or two visits, only 1.9% of the Yemen  
12 population classified at high or very high CV risk at visit 1 moved to average, low, or moderate CV  
13 risk categories after two visits. Current treatment strategies are indeed based on CV risk stratification.  
14 It is recommended that pharmacologic treatment should be provided for all people when their  
15 calculated 10-year CV risk is at least 30% or more. The risk threshold can be lowered to 20% if and  
16 when resources permit. More precisely, age weighted prevalence of subjects at very high CV risk  
17 estimated after one visit did not differ vs the estimation based on the two visits strategy. A mild  
18 difference is appreciable only when the 20% threshold is adopted, corresponding to an estimated  
19 number of 227,000 Yemen patients aged 15-69 years.  
20  
21  
22  
23  
24  
25  
26  
27  
28  
29

30 In conclusion, according to present data, the choice of one or two visits strategy is not relevant,  
31 but it is important to implement a strategy that allows for a more comprehensive framework of CV risk.  
32  
33  
34  
35  
36  
37  
38  
39  
40  
41  
42  
43  
44  
45  
46  
47  
48  
49  
50  
51  
52  
53  
54  
55  
56  
57  
58  
59  
60



## HYDY Study Group

Steering Committee: Pietro Amedeo Modesti (Chair), Husni Al Goshae, Mohamed Bamoshmoosh, Dawood Al-Hidabi, Gian Franco Gensini, Marzia Baldereschi, Stefano Rapi, Luciano Massetti. Monitoring Board: Mohamed Shamsuddin, Hameed M.Akhan, Mahdy Al-Karewany, Abdul-Malik Al-Amrany, Ferdawsi Al-Jilani; Data Center: Ammar Al-Ghadi, Giulia Elisa Cambi, Antonella Ferrari.

## Acknowledgments

We thank the many enthusiastic workers in Yemen who have contributed to the study: *Capital area*: Hisham Abdulrab Ali Al Qubati, Raed Faisal Nasser, Aziz Hussain Ali Moshoeih, Mohammed Abdulah Ashmeni, Abdulhamed Hulfy Alanashany, Mohammed Ibrahim Ahmed Al Hamali, Naif Radman Hamdan Agial, Sami Abduh Kaid Ahmed Alwessaby, Munera Abduwhab Saleh Yahya, Hyam Abdul Kareem Al Hyfi, Ziad Abdullah Mohammed Al Mass, Liza Nayib Shamiri, Sahar Ahmed Abdullah Moqbel, Abdullah Assan Mohammed Guly, Abdulaziz Saeed Salem Bawazir, Abi Saleh Al Rawi, Kaled Sadeg Ali Al-Shaibari, Abdul Bari Mahfoudh Omar Al Daba, Osama Hadi Abdu Haig, Gamil Al Hamdi Abdo Mohsan; *Inland area*: Khalil Abdulwahid Ali Al-Kuhlani, Fahd Ahmed Ahmed Ali Al Durafi, Moad Ahmed Abdul Al Kareem Al Shorihy, Ashra F Saheed Abdalh, Omar Ahmed Abdul Aziz, Kalil Abdu Mohammed Assufi, Ahmed Saeed Ahmed Al Terin, Mamon Ahdo Alrahmen Alp, Fuad Mohammed Ali Abdu Ghaleb, Mohammed Ali Hussien, Mobark Mohammad Dabwan Quasem, Awad Hamad Mohammad; *Coastal area*: Yasin Mohammad Al Hay Ibrahim, Abdu Al Aleem Qaid Abdu Al Aleem Safian, Mohammed Ali Mohammed Salman, Abdh Kozim Abdullah Al Nhozy, Mohammed Awad Omer Hydhi, Hussein Omar Al Ahbari, Adel Hai Bin Obedellah, Khalid Hussan Khaleby. We would also like to thank the chiefs and elders of the villages for their help and Margaret O'Neill for her editorial assistance.

## Disclosures

All authors have completed the Unified Competing Interest form at [www.icmje.org/coi\\_disclosure.pdf](http://www.icmje.org/coi_disclosure.pdf) (available on request from the corresponding author) and declare: no support from any organisation for the submitted work; no financial relationships with any organisations that might have an interest in the submitted work in the previous 3 years; no other relationships or activities that could appear to have influenced the submitted work.

## Details of contributors

PAM, SR, MoB, and MaB drafted the manuscript. PAM, SR, MoB, MaB, LM, GFG, DAH, and HAG were involved in the conception and design of the study. DAH, and HAG were part of the project

1  
2  
3 management team that coordinated data collection for the study. PAM, and MaB wrote the statistical  
4 analysis plan; PAM, SR, and LM conducted the main analyses and provided statistical advice; DZ  
5 revised the draft paper. All authors had access to all data sources, contributed to the interpretation of  
6 results, commented on the report, and approved the final version for publication. PAM is the guarantor.  
7  
8  
9

### 10 **Details of all sources of funding for the study**

11  
12 HYDY project is part of the Executive Programme of Scientific and Technological Cooperation  
13 between Italy and Yemen for the years 2006-09. This work was supported by a grant from the  
14 Ministero dell'Università e della Ricerca (Direzione Generale per le strategie e lo sviluppo  
15 dell'internazionalizzazione della ricerca scientifica e tecnologica), Rome, Italy and Menarini  
16 International Operations Luxembourg SA.  
17  
18  
19

20  
21 All researchers were independent from funders.

22  
23 Funders, had no role in study design; in the collection, analysis, and interpretation of data; in the  
24 writing of the report; and in the decision to submit the article for publication.  
25

### 26 **Statements**

27  
28 The Corresponding Author has the right to grant on behalf of all authors and does grant on behalf  
29 of all authors, a worldwide licence to the Publishers and its licensees in perpetuity, in all forms, formats  
30 and media (whether known now or created in the future), to i) publish, reproduce, distribute, display  
31 and store the Contribution, ii) translate the Contribution into other languages, create adaptations,  
32 reprints, include within collections and create summaries, extracts and/or, abstracts of the Contribution,  
33 iii) create any other derivative work(s) based on the Contribution, iv) to exploit all subsidiary rights in  
34 the Contribution, v) the inclusion of electronic links from the Contribution to third party material  
35 where-ever it may be located; and, vi) licence any third party to do any or all of the above.  
36  
37  
38  
39  
40  
41

42 All authors, external and internal, had full access to all of the data (including statistical reports  
43 and tables) in the study and can take responsibility for the integrity of the data and the accuracy of the  
44 data analysis.  
45  
46

### 47 **Data sharing**

48  
49 There is no additional data available.  
50  
51  
52  
53  
54  
55  
56  
57  
58  
59  
60

**REFERENCES**

1. Rodgers A, Vaughan P. World Health Report 2002: Reducing Risks, Promoting Healthy Life. Geneva, Switzerland: World Health Organization; 2002. Available at URL: <http://www.who.int/whr/2002/en/> Accessed January 26, 2012.
2. Kearney PM, Whelton M, Reynolds K, et al. Global burden of hypertension: analysis of worldwide data. *Lancet*. 2005;365:217-23.
3. Yusuf S, Reddy S, Ounpuu S, et al. Global burden of cardiovascular diseases: part I: general considerations, the epidemiologic transition, risk factors, and impact of urbanization. *Circulation*. 2001;104:2746-53.
4. Global health risks: mortality and burden of disease attributable to selected major risks. WHO, Geneva, 2009: [http://www.who.int/healthinfo/global\\_burden\\_disease/global\\_health\\_risks/en/index.html](http://www.who.int/healthinfo/global_burden_disease/global_health_risks/en/index.html). Accessed January 26, 2012.
5. Pereira M, Lunet N, Azevedo A, Barros H; Differences in prevalence, awareness, treatment and control of hypertension between developing and developed countries. *J Hypertens* 2009;27:963-75.
6. 1999 World Health Organization-International Society of Hypertension Guidelines for the Management of Hypertension. Guidelines Subcommittee. *J Hypertens*. 1999;17:151-83.
7. Mancia G, De Backer G, Dominiczak A, et al.; Management of Arterial Hypertension of the European Society of Hypertension; European Society of Cardiology. 2007 Guidelines for the Management of Arterial Hypertension: The Task Force for the Management of Arterial Hypertension of the European Society of Hypertension (ESH) and of the European Society of Cardiology (ESC). *J Hypertens*. 2007;25:1105-87.
8. Bovet P, Gervasoni JP, Ross AG, et al: Assessing the prevalence of hypertension in populations: are we doing it right? *J Hypertens*. 2003;21:509-17.
9. Figueiredo D, Azevedo A, Pereira M, et al. Definition of hypertension: the impact of number of visits for blood pressure measurement. *Rev Port Cardiol* 2009; 28: 775-83
10. Rothwell PM, Howard SC, Dolan E, et al: Prognostic significance of visit-to-visit variability, maximum systolic blood pressure, and episodic hypertension. *Lancet*. 2010; 375: 895-905.
11. U.S. Census Bureau. International Data Base (IDB). Midyear Population by Age and Sex: Yemen: 2008. <http://www.census.gov/population/international/data/idb/country.php>. Accessed January 26, 2012.
12. WHO STEP programme. <http://www.who.int/chp/steps/en/>. Accessed January 26, 2012.

- 1  
2  
3  
4  
5  
6  
7  
8  
9  
10  
11  
12  
13  
14  
15  
16  
17  
18  
19  
20  
21  
22  
23  
24  
25  
26  
27  
28  
29  
30  
31  
32  
33  
34  
35  
36  
37  
38  
39  
40  
41  
42  
43  
44  
45  
46  
47  
48  
49  
50  
51  
52  
53  
54  
55  
56  
57  
58  
59  
60
13. Tolonen H, Kuulasmaa K, Laatikainen T, et al. Recommendation for indicators, international collaboration, protocol and manual of operations for chronic disease risk factor surveys. (2002). <http://www.ktl.fi/publications/ehrm/product2/title.htm>. Accessed January 26, 2012.
  14. American Diabetes Association. Diagnosis and Classification of Diabetes Mellitus. *Diabetes Care* 2008;31:S55-S60.
  15. Executive summary of the third report of the National Cholesterol Education Program (NCEP) expert panel on detection, evaluation, and treatment of high blood cholesterol in adults (Adult Treatment Panel III). *JAMA* 2001;285:2486-97.
  16. Rothman KJ, Greenland S, Lash TL. *Modern Epidemiology* 3rd Ed. Philadelphia: Lippincott Williams & Wilkins, 2008.
  17. Ahmad O, Boschi-Pinto C, Lopez AD, et al. Age standardization of rates: a new WHO standard. GPE Discussion Paper Series: No. 31, World Health Organization, 2001. <http://www.who.int/healthinfo/paper31.pdf>. Accessed January 26, 2012.
  18. Kerr EA, Zikmund-Fisher BJ, Klamerus ML, et al. The role of clinical uncertainty in treatment decisions for diabetic patients with uncontrolled blood pressure. *Ann Intern Med.* 2008;148:717-27.
  19. Birkett NJ. The effect of alternative criteria for hypertension on estimates of prevalence and control. *J Hypertens.* 1997;15:237-44.
  20. Lang T, de Gaudemaris R, Chatellier G, et al. Epidemiology Group of the Société Française d'Hypertension Artérielle and the IHPAF Working Physicians Group. Prevalence and therapeutic control of hypertension in 30,000 subjects in the workplace. *Hypertension.* 2001;38:449-54.

**Table 1.** Characteristics of HYDY study participants.

|                                                  | Men                    | Women                     |
|--------------------------------------------------|------------------------|---------------------------|
| Participants, n                                  | 5063                   | 5179                      |
| Living in urban location, n (%)                  | 2519 (49.8)            | 2590 (50.0)               |
| Age (years), mean (95% CI)                       | 39.4 (39.0 to 39.9)    | 39.2 (38.7 to 39.6)       |
| 15–24 years, n (%)                               | 1016 (20.1)            | 1058 (20.4)               |
| 25–34 years, n (%)                               | 1020 (20.1)            | 1047 (20.2)               |
| 35–44 years, n (%)                               | 1008 (19.9)            | 1021 (19.7)               |
| 45–54 years, n (%)                               | 990 (19.6)             | 1057 (20.4)               |
| 55–69 years, n (%)                               | 1029 (20.3)            | 996 (19.2)                |
| Smokers (daily), n (%)                           | 1428 (28.2)            | 458 (8.8)                 |
| Education (years), mean (95% CI)                 | 7.7 (7.5 to 7.9)       | 4.4 (4.2 to 4.5)          |
| Illiterate, n (%)                                | 986 (19.5)             | 2666 (51.5)               |
| Can read and write, n (%)                        | 830 (16.4)             | 375 (7.2)                 |
| Primary school, n (%)                            | 685 (13.5)             | 661 (12.8)                |
| Secondary school, n (%)                          | 832 (16.4)             | 542 (10.5)                |
| High school, n (%)                               | 774 (15.3)             | 504 (9.7)                 |
| College or post, n (%)                           | 950 (18.8)             | 428 (8.3)                 |
| Treated with antihypertensive drugs, n           | 215                    | 313                       |
| Height (cm), mean (95% CI)                       | 161.6 (161.4 to 161.8) | 153.1 to (152.9 to 153.3) |
| Weight (kg), mean (95% CI)                       | 60.5 (60.1 to 60.9)    | 56.9 (56.5 to 57.3)       |
| Waist circumference (cm), mean (95% CI)          | 78.5 (78.1 to 78.9)    | 80.0 (79.6 to 80.4)       |
| Abdominal obesity, n (%)                         | 171 (3.4)              | 1372 (26.5)               |
| BMI (kg/m <sup>2</sup> ), mean (95% CI)          | 23.1 (22.9 to 23.3)    | 24.3 (24.1 to 24.5)       |
| Overweight (25.0-29.9 kg/m <sup>2</sup> ), n (%) | 1174 (23.2)            | 1321 (25.5)               |
| Obesity (≥30.0 kg/m <sup>2</sup> ), n (%)        | 349 (6.9)              | 695 (13.4)                |
| High cholesterol (≥5 mmol/L), n (%)              | 593 (11.7)             | 803 (15.5)                |
| High triglycerides (≥1.7 mmol/L), n (%)          | 2007 (39.6)            | 1887 (36.4)               |
| Diabetes                                         | 257 (5.1)              | 281 (5.4)                 |

|                                               |                        |                        |
|-----------------------------------------------|------------------------|------------------------|
| Interval between visits (days), mean (95% CI) | 5.2 (5.2 to 5.3)       | 5.5 (5.4 to 5.6)       |
| First visit (mean, 95% CI)                    |                        |                        |
| Systolic BP (mmHg)                            | 123.0 (122.6 to 123.4) | 122.7 (122.1 to 123.3) |
| Diastolic BP (mmHg)                           | 76.9 (76.5 to 77.3)    | 76.9 (76.7 to 77.1)    |
| Heart rate (mmHg)                             | 79.3 (79.1 to 79.5)    | 2.2 (82.0 to 82.4)     |
| Air temperature (°C)                          | 24.4 (24.2 to 24.6)    | 24.3 (24.1 to 24.5)    |
| Second visit (mean, 95% CI)                   |                        |                        |
| Systolic BP (mmHg)                            | 121.5 (121.1 to 121.9) | 120.6 (120.2 to 121.0) |
| Diastolic BP (mmHg)                           | 76.2 (76.0 to 76.4)    | 76.0 (75.8 to 76.2)    |
| Heart rate (mmHg)                             | 78.5 (78.3 to 78.7)    | 81.1 (80.9 to 81.3)    |
| Air temperature (°C)                          | 24.4 (24.2 to 24.6)    | 24.2 (24.0 to 24.4)    |
| Dipstick test $\geq 1+$ , n (%)               | 339 (6.7)              | 270 (5.2)              |
| Self report of MI,Stroke,POAD, n (%)          | 47 (0.9)               | 38 (0.7)               |

**Table 2.** Prevalence of hypertension, and awareness based on the first visit (visit 1), the second visit (visit 2), or both visits to the 10242 study participants

|                       | Hypertension     |                  |                  |       | Awareness among hypertensive subjects |                  |                  |       |
|-----------------------|------------------|------------------|------------------|-------|---------------------------------------|------------------|------------------|-------|
|                       | Visit 1          | Visit 2          | Both             | Δ     | Visit 1                               | Visit 2          | Both             | Δ     |
| <b>Men (n=5063)</b>   |                  |                  |                  |       |                                       |                  |                  |       |
| Age decades, n (%)    |                  |                  |                  |       |                                       |                  |                  |       |
| 15–24 years           | 48 (4.7)         | 42 (4.2)         | 15 (1.5)         | -68.1 | 4 (8.3)                               | 4 (9.5)          | 4 (26.7)         | 220.0 |
| 25–34 years           | 82 (8.0)         | 68 (6.7)         | 41 (4.0)         | -50.0 | 13 (15.9)                             | 13 (19.1)        | 13 (31.7)        | 100.0 |
| 35–44 years           | 142 (14.1)       | 101 (10.0)       | 73 (7.2)         | -48.6 | 20 (14.1)                             | 20 (19.8)        | 20 (27.4)        | 94.5  |
| 45–54 years           | 263 (26.6)       | 234 (23.7)       | 188 (19.0)       | -28.7 | 85 (32.3)                             | 85 (36.3)        | 85 (45.2)        | 39.9  |
| 55–69 years           | 375 (36.5)       | 315 (30.6)       | 272 (26.4)       | -27.5 | 118 (31.5)                            | 118 (37.5)       | 118 (43.4)       | 37.9  |
| Prevalence, % (95%CI) |                  |                  |                  |       |                                       |                  |                  |       |
| Crude                 | 18.0 (16.9-19.1) | 15.0 (14.0-16.0) | 11.6 (10.8-12.5) | -35.3 | 26.4 (23.7-29.4)                      | 31.3 (28.1-34.7) | 39.9 (36.0-43.9) | 54.5  |
| Age standardized*     | 16.2 (15.1-17.3) | 13.5 (12.5-14.4) | 10.2 (9.4-11.0)  | -37.0 | -                                     | -                | -                | -     |
| <b>Women (n=5179)</b> |                  |                  |                  |       |                                       |                  |                  |       |
| Age decades, n (%)    |                  |                  |                  |       |                                       |                  |                  |       |
| 15–24 years           | 56 (5.3)         | 40 (3.8)         | 17 (1.6)         | -69.7 | 1 (1.8)                               | 1 (2.5)          | 1 (5.9)          | 229.4 |
| 25–34 years           | 97 (9.3)         | 68 (6.5)         | 46 (4.4)         | -52.6 | 16 (16.5)                             | 16 (23.5)        | 16 (34.8)        | 110.9 |

1  
2  
3  
4  
5  
6  
7  
8  
9  
10  
11  
12  
13  
14  
15  
16  
17  
18  
19  
20  
21  
22  
23  
24  
25  
26  
27  
28  
29  
30  
31  
32  
33  
34  
35  
36  
37  
38  
39  
40  
41  
42  
43  
44  
45  
46  
47  
48  
49

|                       |                  |                  |                  |       |                  |                  |                  |      |
|-----------------------|------------------|------------------|------------------|-------|------------------|------------------|------------------|------|
| 35–44 years           | 163 (16.0)       | 136 (13.4)       | 105 (10.3)       | -35.6 | 54 (33.1)        | 54 (39.7)        | 54 (51.4)        | 55.2 |
| 45–54 years           | 371 (35.1)       | 325 (30.8)       | 285 (27.0)       | -23.2 | 138 (37.2)       | 138 (42.5)       | 138 (48.4)       | 30.2 |
| 55–69 years           | 356 (35.7)       | 297 (29.8)       | 265 (26.6)       | -25.6 | 133 (37.4)       | 133 (44.8)       | 133 (50.2)       | 34.3 |
| Prevalence, % (95%CI) |                  |                  |                  |       |                  |                  |                  |      |
| Crude                 | 20.1 (19.1-21.2) | 16.7 (15.7-17.8) | 13.9 (12.9-14.8) | -31.2 | 33.8 (31.0-36.8) | 39.8 (36.6-43.1) | 46.9 (43.3-50.6) | 45.3 |
| Age standardized*     | 18.3 (17.2-19.4) | 15.1 (14.1-16.1) | 12.3 (11.4-13.2) | -32.8 | -                | -                | -                | -    |

Δ = (percentage based on visit 1 – percentage based on both visits)/ percentage based on visit 1

\* to the WHO standard population 2001



**Table 3.** Prevalence of treatment and control based on the first visit (visit 1), the second visit (visit 2), or both visits to the 10242 study participants.

|                       | Current treatment among hypertensive subjects |                  |                  |       | BP control among treated subjects |                  |                  |       |
|-----------------------|-----------------------------------------------|------------------|------------------|-------|-----------------------------------|------------------|------------------|-------|
|                       | Visit 1                                       | Visit 2          | Both             | Δ     | Visit 1                           | Visit 2          | Both             | Δ     |
| <b>Men (n=5063)</b>   |                                               |                  |                  |       |                                   |                  |                  |       |
| Age decades, n (%)    |                                               |                  |                  |       |                                   |                  |                  |       |
| 15–24 years           | 3 (6.3)                                       | 3 (7.1)          | 3 (20.0)         | 220.0 | 1 (33.3)                          | 1 (33.3)         | 1 (33.3)         | -     |
| 25–34 years           | 10 (12.2)                                     | 10 (14.7)        | 10 (24.4)        | 100.0 | 3 (30.0)                          | 2 (20.0)         | 0 (0.0)          | -     |
| 35–44 years           | 17 (12.0)                                     | 17 (16.8)        | 17 (23.3)        | 94.5  | 7 (41.2)                          | 9 (52.9)         | 7 (41.2)         | -     |
| 45–54 years           | 73 (27.8)                                     | 73 (31.2)        | 73 (38.8)        | 39.9  | 19 (26.0)                         | 23 (31.5)        | 14 (19.2)        | -26.3 |
| 55–69 years           | 112 (29.9)                                    | 112 (35.6)       | 112 (41.2)       | 37.9  | 19 (17.0)                         | 33 (29.5)        | 15 (13.4)        | -21.1 |
| Prevalence, % (95%CI) |                                               |                  |                  |       |                                   |                  |                  |       |
| Crude                 | 23.6 (20.9-26.5)                              | 28.3 (25.2-31.6) | 36.5 (32.7-40.5) | 54.5  | 22.8 (17.7-28.8)                  | 31.6 (25.8-38.1) | 17.2 (12.8-22.6) | -24.5 |
| <b>Women (n=5179)</b> |                                               |                  |                  |       |                                   |                  |                  |       |
| Age decades, n (%)    |                                               |                  |                  |       |                                   |                  |                  |       |
| 15–24 years           | 1 (1.8)                                       | 1 (2.5)          | 1 (5.9)          | 229.4 | 0 (0.0)                           | 0 (0.0)          | 0 (0.0)          | -     |
| 25–34 years           | 13 (13.4)                                     | 13 (19.1)        | 13 (28.3)        | 110.9 | 8 (61.5)                          | 9 (69.2)         | 6 (46.2)         | -25.0 |
| 35–44 years           | 50 (30.7)                                     | 50 (36.8)        | 50 (47.6)        | 55.2  | 27 (54.0)                         | 29 (58.0)        | 22 (44.0)        | -18.5 |

1  
2  
3  
4  
5  
6  
7  
8  
9  
10  
11  
12  
13  
14  
15  
16  
17  
18  
19  
20  
21  
22  
23  
24  
25  
26  
27  
28  
29  
30  
31  
32  
33  
34  
35  
36  
37  
38  
39  
40  
41  
42  
43  
44  
45  
46  
47  
48  
49

|                       |                  |                  |                  |      |                  |                  |                  |       |
|-----------------------|------------------|------------------|------------------|------|------------------|------------------|------------------|-------|
| 45–54 years           | 124 (33.4)       | 124 (38.2)       | 124 (43.5)       | 30.2 | 36 (29.0)        | 47 (37.9)        | 31 (25.0)        | -13.9 |
| 55–69 years           | 125 (35.1)       | 125 (42.1)       | 125 (47.2)       | 34.3 | 38 (30.4)        | 41 (32.8)        | 31 (24.8)        | -18.4 |
| Prevalence, % (95%CI) |                  |                  |                  |      |                  |                  |                  |       |
| Crude                 | 30.0 (27.3-32.9) | 36.1 (33.0-39.4) | 43.6 (40.0-47.2) | 45.3 | 34.8 (29.7-40.2) | 40.3 (35.0-45.7) | 28.7 (24.0-34.0) | -17.4 |

Δ = (percentage based on visit 1 – percentage based on both visits)/ percentage based on visit 1

For peer review only

**Table 4.** Rates of proteinuria and self-reported CV disease in HYDY participants found to be hypertensive at visit 1, at visit 2, or at both visits, in subjects finally excluded from the final diagnosis of hypertension (not confirmed), in normotensive subjects and in all participants.

| Diagnosis               | Subjects | DIPSTIK test $\geq 1+$ |                   | Self-report of CV disease |                  |
|-------------------------|----------|------------------------|-------------------|---------------------------|------------------|
|                         | n        | n                      | % (95% CI)        | n                         | % (95% CI)       |
| Hypertension at Visit 1 | 1938     | 153                    | 7.9 (6.8 to 9.2)  | 58                        | 3.0 (2.3 to 3.8) |
| Hypertension at Visit 2 | 1614     | 141                    | 8.7 (7.5 to 10.2) | 55                        | 3.4 (2.6 to 4.4) |
| Hypertension at both    | 1296     | 123                    | 9.5 (8.0 to 11.2) | 53                        | 4.1 (3.1 to 5.3) |
| Not confirmed           | 959      | 48                     | 5.0 (3.8 to 6.6)  | 7                         | 0.7 (0.0 to 1.5) |
| Normotensives           | 7769     | 438                    | 5.6 (5.1 to 6.2)  | 25                        | 0.3 (0.2 to 0.5) |
| All participants        | 10025    | 609                    | 6.1 (5.6 to 6.6)  | 85                        | 0.8 (0.7 to 1.0) |

**Table 5.**

CV risk distribution among the 9926 adult subjects investigated in the HYDY study based on the results first visit (visit 1), or both visits.

| Risk Categories | After Visit 1 |            |                            | After two visits |            |                            | $\Delta$<br>n= |
|-----------------|---------------|------------|----------------------------|------------------|------------|----------------------------|----------------|
|                 | n=            | Crude<br>% | Age weighted<br>% (95% CI) | n=               | Crude<br>% | Age weighted<br>% (95% CI) |                |
| Average risk    | 2246          | 22.6       | 30.3 (28.9 to 31.6)        | 2326             | 23.4       | 31.3 (29.9 to 32.7)        | 128851         |
| Low risk        | 3387          | 34.1       | 33.7 (32.4 to 35.0)        | 3495             | 35.2       | 34.1 (32.8 to 35.4)        | 48207          |
| Moderate risk   | 2234          | 22.5       | 20.3 (19.3 to 21.3)        | 2281             | 23.0       | 20.7 (19.7 to 21.7)        | 52613          |
| High risk       | 1206          | 12.1       | 8.2 (7.7 to 8.7)           | 1033             | 10.4       | 6.6 (6.1 to 7.1)           | -190741        |
| Very high risk  | 853           | 8.6        | 7.5 (6.9 to 8.1)           | 792              | 8.0        | 7.2 (6.6 to 7.8)           | -36523         |

$\Delta$  = estimated difference between Yemen subjects attributed to the risk category on the basis of BP measurements taken at the first visit and those attributed to the same class on the basis of average of BP measurements taken at both visits (subjects allocated at Visit 1 – subjects allocated after two visits).

## Legends to Figures

### Figure 1.

Diagnosis of hypertension (systolic blood pressure  $\geq 140$  mm Hg and/or diastolic blood pressure  $\geq 90$  mm Hg and/or self-reported use of antihypertensive drugs at the time of the interview) performed on the basis of measurements taken at the first visit (visit 1), at the second visit (visit 2), or both. The number of subjects with and without the condition and age-weighted rates (to the 15-69 years Yemen population) are reported.

### Figure 2.

Factors associated with the misclassification of hypertension diagnosis (systolic blood pressure  $\geq 140$  mm Hg and/or diastolic blood pressure  $\geq 90$  mm Hg at both visits) at multiple logistic regression analysis including only non-treated subjects (n=1396). Results are expressed as odd ratio (OR) with 95% CI.

### Figure 3.

Blood pressure and CV risk stratification of HYDY participants according to the ESH/ESC chart using average blood pressure values at visit1 and at both visits.

1  
2  
3  
4  
5  
6  
7  
8  
9  
10  
11  
12  
13  
14  
15  
16  
17  
18  
19  
20  
21  
22  
23  
24  
25  
26  
27  
28  
29  
30  
31  
32  
33  
34  
35  
36  
37  
38  
39  
40  
41  
42  
43  
44  
45  
46  
47  
48  
49  
50  
51  
52  
53  
54  
55  
56  
57  
58  
59  
60

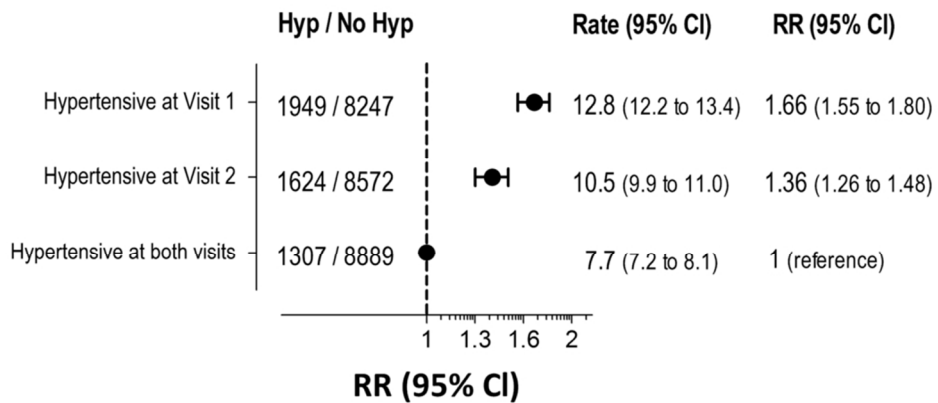

Diagnosis of hypertension (systolic blood pressure  $\geq 140$  mm Hg and/or diastolic blood pressure  $\geq 90$  mm Hg and/or self-reported use of antihypertensive drugs at the time of the interview) performed on the basis of measurements taken at the first visit (visit 1), at the second visit (visit 2), or both. The number of subjects with and without the condition and age-weighted rates (to the 15-69 years Yemen population) are reported.  
87x41mm (300 x 300 DPI)

review only

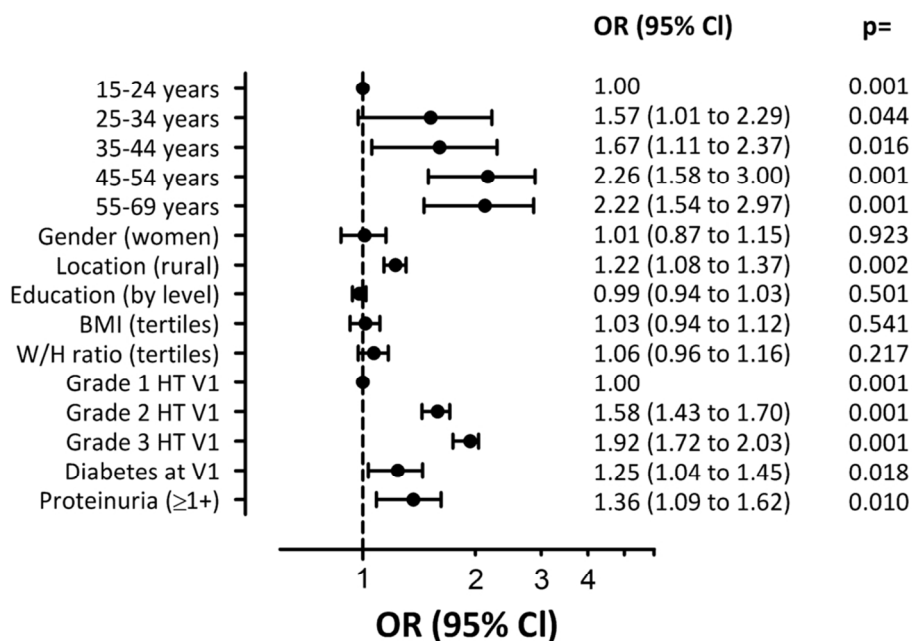

Factors associated with the misclassification of hypertension diagnosis (systolic blood pressure  $\geq 140$  mm Hg and/or diastolic blood pressure  $\geq 90$  mm Hg at both visits) at multiple logistic regression analysis including only non-treated subjects (n=1396). Results are expressed as odd ratio (OR) with 95% CI.  
100x68mm (300 x 300 DPI)

1  
2  
3  
4  
5  
6  
7  
8  
9  
10  
11  
12  
13  
14  
15  
16  
17  
18  
19  
20  
21  
22  
23  
24  
25  
26  
27  
28  
29  
30  
31  
32  
33  
34  
35  
36  
37  
38  
39  
40  
41  
42  
43  
44  
45  
46  
47  
48  
49  
50  
51  
52  
53  
54  
55  
56  
57  
58  
59  
60

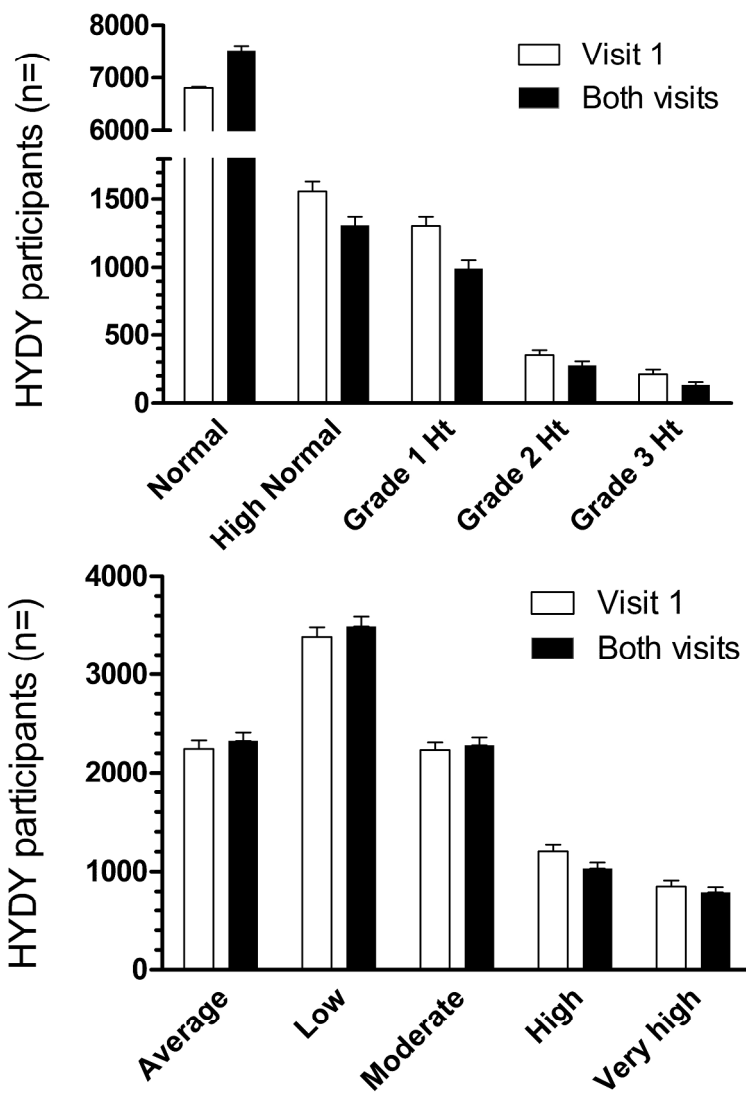

Blood pressure and CV risk stratification of HYDY participants according to the ESH/ESC chart using average blood pressure values at visit1 and at both visits.  
248x357mm (300 x 300 DPI)





**Impact of one or two visits strategy on hypertension burden estimation in HYDY, a population based cross-sectional study: implications for health care resource allocation decision making**

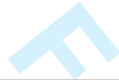

|                                 |                                                                                                                                                                                                                                                                                                                                                                                                                                                                                                                                                                                                                                                                                                                                                                                                                                       |
|---------------------------------|---------------------------------------------------------------------------------------------------------------------------------------------------------------------------------------------------------------------------------------------------------------------------------------------------------------------------------------------------------------------------------------------------------------------------------------------------------------------------------------------------------------------------------------------------------------------------------------------------------------------------------------------------------------------------------------------------------------------------------------------------------------------------------------------------------------------------------------|
| Journal:                        | <i>BMJ Open</i>                                                                                                                                                                                                                                                                                                                                                                                                                                                                                                                                                                                                                                                                                                                                                                                                                       |
| Manuscript ID:                  | bmjopen-2012-001062.R1                                                                                                                                                                                                                                                                                                                                                                                                                                                                                                                                                                                                                                                                                                                                                                                                                |
| Article Type:                   | Research                                                                                                                                                                                                                                                                                                                                                                                                                                                                                                                                                                                                                                                                                                                                                                                                                              |
| Date Submitted by the Author:   | 11-Jun-2012                                                                                                                                                                                                                                                                                                                                                                                                                                                                                                                                                                                                                                                                                                                                                                                                                           |
| Complete List of Authors:       | Modesti, Pietro; University of Florence, Department of Medical and Surgical Critical Care<br>Rapi, Stefano; Azienda Ospedaliero Universitaria Careggi (AOUC),<br>Bamoshmoosh, Mohamed; University of Science and Technology, Science and Technology University Hospital,<br>Baldereschi, Marzia; Italian National Research Council,<br>Masseti, Luciano; Italian National Research Council,<br>Gensini, Gian Franco; University of Florence, Department of Medical and Surgical Critical Care<br>Zhao, Dong; Capital Medical University Affiliated Beijing Anzhen Hospital, Beijing Institute of Heart, Lung and Blood Vessel Diseases, Department of Epidemiology<br>Al-Hidabi, Dawood; University of Science and Technology,<br>Al Goshae, Husni; University of Science and Technology, Science and Technology University Hospital, |
| <b>Primary Subject Heading</b>: | Global health                                                                                                                                                                                                                                                                                                                                                                                                                                                                                                                                                                                                                                                                                                                                                                                                                         |
| Secondary Subject Heading:      | Cardiovascular medicine, Epidemiology, Health policy, Public health, Health services research                                                                                                                                                                                                                                                                                                                                                                                                                                                                                                                                                                                                                                                                                                                                         |
| Keywords:                       | Hypertension < CARDIOLOGY, EPIDEMIOLOGY, PREVENTIVE MEDICINE, PUBLIC HEALTH, Diabetes & endocrinology < INTERNAL MEDICINE, Cardiology < INTERNAL MEDICINE                                                                                                                                                                                                                                                                                                                                                                                                                                                                                                                                                                                                                                                                             |
|                                 |                                                                                                                                                                                                                                                                                                                                                                                                                                                                                                                                                                                                                                                                                                                                                                                                                                       |

SCHOLARONE™  
Manuscripts

## Overall comments

The authors thank the reviewers for their comments.

### Responses to comments of Reviewer 1

**Comment 1: The authors should more discuss the finding that microalbuminuria does not help in detecting real hypertensive patients.**

Response 1: We did not screen subjects for microalbuminuria. Proteinuria (protein  $\geq 1+$  at multiparametric conventional dipstick, MCD) was a significant predictor of hypertension confirmation at visit two. MCD at the score level of protein trace had 88% sensitivity and 81% specificity (AUC 88%) for microalbuminuria (urinary albumin concentration  $>20$  mg/L) (Rapi et al. Saudi Med J. 2010; 31: 708-9). However, 95% CI for “protein trace” did not allow screening subjects fulfilling hypertension criteria at both visits. Data are reported in the following Table:

|                    | All   | Subjects with protein trace at DIPSTIK |      |                |
|--------------------|-------|----------------------------------------|------|----------------|
|                    | n=    | n=                                     | %    | (95% CI)       |
| All                | 10025 | 1652                                   | 16.5 | (15.8 to 17.2) |
| Hyp at Visit 1     | 1938  | 325                                    | 16.8 | (15.2 to 18.5) |
| Hyp at Visit 2     | 1614  | 271                                    | 16.8 | (15.0 to 18.7) |
| Hyp at both Visits | 1296  | 225                                    | 17.4 | (15.4 to 19.5) |
| Excluded           | 960   | 146                                    | 15.2 | (13.1 to 17.6) |
| Normotensives      | 7769  | 1281                                   | 16.5 | (15.7 to 17.3) |

Probably this pattern is to be seen in the perspective of a developing country where the prevalence of hypertension is low and post-infectious diseases are still main etiology for kidney damage.

**Comment 2: The authors should compare the prevalence of hypertension in Yemen as compared to developed countries, taking into consideration the difference in the age range.**

Response 2: We have added the following paragraph in the last page (page 15) of the Discussion:

“The age-standardized prevalence of hypertension at first visit for subjects aged 15-69 years (16.2%) is markedly lower than rates reported in economically developed countries for subjects older than 20 years (37.3%) (2). Most importantly, direct age standardization to the 35-69 years WHO World Standard Population (17) (26.6%; 25.5 to 27.6), allows comparison with Egypt (33.8%) (21), Iran (34.1%) (22), or Turkey (34.2%) (23). The low prevalence of hypertension, besides any methodological consideration, might thus be related to the possibility that Yemen is behind in the epidemiological transition currently ongoing in other countries of the Middle East Crescent area.”

**Comment 3: The manuscript is very interesting. It would be important to add some more information about the life style of the study population: alimentation, physical activity....**

Response 3: Thank you for appreciating our study. We focused analysis on the impact of diagnostic criteria for resource allocation in developing countries. Information about the life style is however available so we added required data in Table 1.

**Table 1. Characteristics of HYDY study participants.**

|                                            |             |             |
|--------------------------------------------|-------------|-------------|
| Self-reported physical activity, n (%)     |             |             |
| Sedentary                                  | 914 (21.1)  | 1465 (32.8) |
| Light to moderate                          | 2606 (60.1) | 2586 (57.9) |
| Vigorous                                   | 814 (18.8)  | 418 (9.4)   |
| Self-reported fruit consumption, n (%)     |             |             |
| ≤1 day/week                                | 2357 (46.7) | 2470 (47.8) |
| 2-4 day/week                               | 1947 (38.6) | 1962 (37.9) |
| ≥5 days/week                               | 744 (14.7)  | 740 (14.3)  |
| Self-reported vegetable consumption, n (%) |             |             |
| ≤1 day/week                                | 1101 (21.8) | 1040 (20.1) |
| 2-4 day/week                               | 1362 (26.9) | 1437 (27.8) |
| ≥5 days/week                               | 2597 (51.3) | 2692 (52.1) |

**Responses to comments of Reviewer 2**

**Comment 1:** *The authors aims to compare the differences on prevalence, awareness, treatment and control rates obtained on data collected at one vs, two visits, and to identify the characteristics of the subjects who have not high blood pressure in both visits. The authors seem to confuse the aims of a population-based survey where the objective is to estimate the prevalence of hypertension, usually in 3 measures within one visit, with the detection and diagnoses of hypertension at an individual level, which usually relies on more than one visit. Again, the overestimation of the prevalence of high BP when readings are based on a single visit is probably due to "regression to the mean", which is very important for the clinical diagnosis of HTN when just one BP check may overestimate this condition. On the other hand, if population-based prevalence data are based on two visits instead of one, the comparability assured by WHO-STEPS across the globe could be compromised and prevalence of HTN in Yemen could be underestimated.*

Response 1: We are aware of misinterpretations which may rise with our approach. To allow comparability with studies performed across the globe age specific and age standardized rates of HTN at visit 1 and at both visits were included in Table 2. However, as you correctly summarize, the aim of this approach was to identify the characteristics of the subjects who have not high blood pressure in both visits.

**Comment 2:** *As BP values rise in a particular subject, so does the probability to remain hypertensive after a new measure. The same occurs when end-organ damage or other risk factors are present. This does not necessarily implies that these last individuals are "real" hypertensives but that they are higher risk hypertensives. This fact should be emphasized in the text.*

Response 2: Thank you for this observation. We added the following sentence in the Discussion (line two from the bottom, page 14):

"This does not necessarily imply that subjects with high blood pressure at both visits are "real" hypertensives but that they are higher risk hypertensives."

**Comment 3:** *The authors found that BP measured in two visits resulted in a 35% reduction in the prevalence of hypertension mostly based on excluding subjects with low risk. They highlight the importance of this issue as essential for estimating drug costs and budget allocation in prioritization of prevention program. This is relevant if the main research*

1  
2  
3 *question of this approach is not just to estimate the prevalence of high BP in one or two*  
4 *visits but to estimate more accurately the magnitude and extent of the resources that should*  
5 *be allocated to the prevention of hypertension. In my opinion, the authors should reframe*  
6 *the objectives of the study and highlight resource-allocation decision making rather than*  
7 *prevalence.*

8  
9 Response 3: You perfectly centered the goal of our study. Notwithstanding the progressive  
10 reduction of BP values at repeated measurements, resource-allocation decision making is  
11 usually based on data collected at a single visit, often on a single risk factor. To achieve our  
12 objective we included strategies aimed at exploring risk of excluded subjects. According to  
13 present data the integration of BP measurement with simple “low cost” diagnostic tests might  
14 offer advantages in costs estimation. The importance for policy makers in the health care  
15 resource allocation decision making process is now highlighted in the introduction section.  
16 The objective was modified as follows:  
17 “To investigate the effects on health care resource allocation decision making of taking blood  
18 pressure at one or two visits with CV risk stratification.”  
19

20  
21 We also modified the title as follows:

22 “Impact of one or two visits strategy on hypertension burden estimation in HYDY, a  
23 population based cross-sectional study: implications for health care resource allocation  
24 decision making.”  
25  
26  
27  
28  
29  
30  
31  
32  
33  
34  
35  
36  
37  
38  
39  
40  
41  
42  
43  
44  
45  
46  
47  
48  
49  
50  
51  
52  
53  
54  
55  
56  
57  
58  
59  
60

1  
2  
3 **Impact of one or two visits strategy on hypertension burden estimation in HYDY, a population**  
4 **based cross-sectional study: implications for health care resource allocation decision making.**  
5  
6  
7  
8  
9

10 Pietro Amedeo Modesti, Professor of Internal Medicine <sup>1,2,3</sup>, [pamodesti@unifi.it](mailto:pamodesti@unifi.it),

11 Stefano Rapi, Director of Chemical Laboratory <sup>2</sup>, [rapis@aou-careggi.toscana.it](mailto:rapis@aou-careggi.toscana.it),

12 Mohamed Bamoshmoosh, Professor of Medicine <sup>4</sup>, [bamoshmoosh@hotmail.it](mailto:bamoshmoosh@hotmail.it),

13 Marzia Baldereschi, Epidemiologist <sup>5</sup>, [baldereschi@in.cnr.it](mailto:baldereschi@in.cnr.it),

14 Luciano Massetti, Computer Science Engineer <sup>5</sup>, [l.massetti@ibimet.cnr.it](mailto:l.massetti@ibimet.cnr.it),

15 Gian Franco Gensini, Professor of Internal Medicine <sup>1,2,3</sup>, [gianfranco.gensini@unifi.it](mailto:gianfranco.gensini@unifi.it),

16 Dong Zhao, Professor of Epidemiology <sup>6</sup>, [deezhao@vip.sina.com](mailto:deezhao@vip.sina.com),

17 Dawood Al-Hidabi, Rector University <sup>4</sup>, [d.alhidabi@ust.edu.ye](mailto:d.alhidabi@ust.edu.ye),

18 Husni Al Goshae, Professor of Medicine <sup>4</sup>, [algoshae@gmail.com](mailto:algoshae@gmail.com),

19  
20  
21  
22  
23  
24  
25  
26  
27  
28  
29  
30 <sup>1</sup> Department of Medical and Surgical Critical Care, University of Florence, viale Morgagni 85, 50134  
31 Florence, Italy; <sup>2</sup> Azienda Ospedaliero Universitaria Careggi (AOUC), Largo Giovanni Alessandro  
32 Brambilla 3, 50134 Florence, Italy; <sup>3</sup> Fondazione Don Carlo Gnocchi, Centro di S.Maria degli Ulivi,  
33 124, V. Impruneta 50023 Pozzolatico Florence, Italy; <sup>4</sup> University of Science and Technology, Science  
34 and Technology University Hospital, sixty St., P.O. Box 13061, Sana'a, Yemen; <sup>5</sup> Italian National  
35 Research Council, Via Madonna del Piano 10, 50019 Sesto Fiorentino, Florence, Italy; <sup>6</sup> Department of  
36 Epidemiology, Capital Medical University Affiliated Beijing Anzhen Hospital, Beijing Institute of  
37 Heart, Lung and Blood Vessel Diseases, No. 2 Anzhen Street, Chaoyang District, Beijing 100029,  
38 China.  
39  
40  
41  
42  
43  
44  
45  
46

47 **Correspondence to:** P A Modesti [pamodesti@unifi.it](mailto:pamodesti@unifi.it)

48 **Word count: 3876**  
49  
50  
51  
52  
53  
54  
55  
56  
57  
58  
59  
60

**Contributorship Statement:**

PAM, SR, MoB, and MaB drafted the manuscript. PAM, SR, MoB, MaB, LM, GFG, DAH, and HAG were involved in the conception and design of the study. DAH, and HAG were part of the project management team that coordinated data collection for the study. PAM, and MaB wrote the statistical analysis plan; PAM, SR, and LM conducted the main analyses and provided statistical advice; DZ provided substantial contributions to analysis and interpretation of data and revised the draft paper. All authors had access to all data sources, contributed to the interpretation of results, commented on the report, and approved the final version for publication. PAM is the guarantor.

## Summary

### 1. Article Focus

To investigate the effects on health care resource allocation decision making of taking blood pressure at one or two visits with CV risk stratification.

To identify the characteristics of subjects who are excluded from the final diagnosis when restricting the diagnostic criteria.

### 2. Key Messages

The present study clarify that although there is a large discrepancy (35%) in the estimation of hypertension prevalence on the basis of one visit or two visits, only 1.9% of subjects classified at high or very high CV risk at visit 1 moved to average, low, or moderate CV risk categories after two visits.

Subjects excluded from the final diagnosis of hypertension, had rates of proteinuria and self-reported CV disease comparable with normotensive subjects and the general population.

According to present data the choice of one or two visits is not relevant when a strategy that allows for a more comprehensive framework of CV risk is implemented.

### 3. Strength and Limitations

This study utilised data from nationally representative survey conducted with a door to door approach and a high response level in a developing country.

Laboratory investigations were performed with the use of dry chemistry. However the long distance to get to a service laboratory requires shipments under special conditions, often resulting in deterioration and spoilage of the specimen.

## ABSTRACT

**Context.**The prevalence of hypertension in developing countries is coming closer to values found in developed countries. However, surveys usually rely on readings taken at a single visit, the option to implement the diagnosis on readings taken at multiple visits, being limited by costs.

**Objective.**To estimate more accurately the magnitude and extent of the resource that should be allocated to the prevention of hypertension.

**Design.**Population-based cross-sectional survey with triplicate blood pressure readings taken on two separate home-visits.

**Setting.**Rural and urban locations in three areas of Yemen (capital, inland, and coast).

**Participants.**A nationally representative sample of the Yemen population aged 15 to 69 years (5063 men and 5179 women), with an overall response rate of 92% in urban and 94% in rural locations.

**Main outcome measure.**Hypertension diagnosed as systolic blood pressure  $\geq 140$  mmHg and/or diastolic blood pressure  $\geq 90$  mmHg and/or self-reported use of antihypertensive drugs.

**Results.**Hypertension prevalence (age-standardized to the WHO world population 2001) based on fulfilling the same criteria on both visits (11.3%;95%CI 10.7-11.9), was 35% lower than estimation based on the first visit (17.3%;16.5-18.0). Advanced age, blood glucose  $\geq 7$  mmol/L, or proteinuria  $\geq 1+$  at dipstick test at visit one, were significant predictors of confirmation at visit two. The 959 participants found to be hypertensive at visit one or at visit two only and thus excluded from the final diagnosis, had a rate of proteinuria (5.0%;3.8-6.5) comparable to rates of the general population (6.1%; 5.6-6.6), and of subjects normotensive at both visits (5.6%;5.1-6.2). Only 1.9% of Yemen population classified at high or very high CV risk at visit one moved to average, low, or moderate CV risk categories after two visits.

**Conclusions.**Hypertension prevalence based on readings obtained after two visits is 35% lower than estimation based on the first visit, subjects were excluded from final diagnosis belonging to low CV risk classes.

### Subject headings

hypertension (high blood pressure); hypertension diagnosis; cardiovascular disease risk factors; epidemiology; survey;



## INTRODUCTION

The World Health Organization has been indicating since 2001 that cardiovascular (CV) disease is the first cause of death worldwide (1). More precisely, 80% of CV death are now occurring in low- and middle-income countries (2, 3). Surveys performed in developing countries are revealing that changing lifestyle and urbanization are associated with a growing prevalence of hypertension (4) which is coming closer to values found in developed countries (5). All these surveys rely on readings taken at a single visit, the option to implement the diagnosis on readings taken at multiple visits, as recommended by guidelines for clinical practice (6,7), being limited due to costs. Diagnostic criteria based on readings collected at a single visit, might however lead to include subjects with high BP variability and episodic hypertension, with a final overestimation of hypertension prevalence (8,9). Although high BP variability potentially increases the risk of future CV events (10), treatment decision is uncertain. Conversely resource allocation in developing countries requires sound data. Finally, although the association between hypertension and target organ damage was recently reported to be independent by the diagnostic criteria (9), the CV risk characteristics of subjects which are impacted more from the two survey strategies, being either included among hypertensives after a single visit survey or excluded when restricting the diagnostic criteria, is currently unknown.

In the Hypertension and Diabetes in Yemen (HYDY) survey, subjects received urine dipstick test for proteinuria combined with triplicate blood pressure readings performed during two separate home-visits as recommended by guidelines for the clinical diagnosis of hypertension (6,7). To estimate more accurately the magnitude and extent of the resource that should be allocated to the prevention of hypertension we 1) compared prevalence, awareness, treatment, and control rates, and ~~on~~ CV risk stratification when the definition of hypertension rely on data collected either at a single or at two visits carried out in different dates and 2) identified the characteristics of subjects who are excluded from the final diagnosis when restricting the diagnostic criteria.

## METHODS

### Study Sites and Study Population

The Yemen population was estimated to be more than 21 million in 2007 (11). A multi-stage stratified sampling method was used. In the first stage, Yemen was stratified into three regions, the capital area, the inland, and the coastal area. In addition to the governorate of Sana'a, the governorate of Taizz in the inland, and the governorates of Al Hudaydah and Hadramaut on the coast were selected to be representative of the geographic, economic, and climatic characteristics of the country. In the second stage, rural and city regions were identified from each study area. In the third stage, districts were arbitrarily identified within each urban and rural region, boundaries being defined using local maps or in consultation with the local health workers. The total number of districts within each study area (20 in the capital area, 12 in the inland, and 8 in the coastal area) was proportional to the estimated population size of the area. In the final stage, due to the lack of a national population register, a cluster of 300 participants was made for each district, participants being equally-allocated by gender and age-group (6-14 years; 15-24; 25-34; 35-44; 45-54; 55-69) to a total of twelve strata. All male and female subjects aged 6 through 69 years who lived permanently in the study areas were eligible. Pregnant women were excluded. A common set of rules for making a cluster was followed. Briefly, a sampling frame was established following enumeration of houses counting from the centre to the suburbs of the district and the first house to be surveyed was chosen at random by choosing a number on the list and selecting the corresponding house. Investigators then continued to call at every second address, always turning left. A household was defined as a group of people who usually live under the same roof and share meals. If more than one household was present in the same dwelling one was randomly selected. All of the eligible subjects in the same household were invited to take part in study. One hundred and eighty-two subjects refused to participate, and 12257 were evaluated between February 2008 and March 2009. Results obtained in subjects aged  $\geq 15$  years (5063 men and 5179 women) are reported in the present study.

The study was approved by the Ethical Committee of the University of Science and Technology, Sana'a, Yemen (Ref. 1-2007). Districts Leaders and local Chiefs also consented to the survey. Informed consent was obtained from every participant before data collection. No incentives were offered to study participants. Participants with untreated conditions identified during the examination were referred to a primary health-care provider.

### Data collection

1  
2  
3 The survey was performed following the three different levels of the World Health Organization  
4 Stepwise Approach to Chronic Disease Risk Factor Surveillance (STEPS)(12), which included  
5 questionnaire, physical measurements, and biochemical measurements, using standardized methods.  
6  
7 The burden of hypertension in the population was assessed by taking triplicate BP measurements on  
8  
9 two visits, separated by few days. Data collection was conducted at home by centrally trained survey  
10  
11 teams composed by two investigators of the opposite gender.  
12  
13

14 Community sensitization activities preceded each survey round, including local council briefings  
15  
16 with the chiefs and elders of the villages. During the first visit (visit 1) the head of the household or  
17  
18 spouse and the participant were informed about the objectives, and procedural details of the survey.  
19  
20 Privacy of information was assured. After obtaining consent, study questionnaire was administered.  
21  
22 The study questionnaire included questions about demographics, lifestyle, and medical history (WHO  
23  
24 STEPS-Instrument v2.0)(12). Participants were asked if they had been advised to change their diet  
25  
26 (“special prescribed diet”), or to lose weight (“advice or treatment to lose weight”), or quit smoking  
27  
28 (“advice or treatment to stop smoking”), or do exercise (“advice to start or do more exercise”),  
29  
30 attributed to hypertension, by indication of a health professional. Close-ended questions were asked to  
31  
32 find out if they had been seen by a traditional healer over the last year or if they had been using herbal  
33  
34 or traditional remedies attributed to high blood pressure. “Known ischaemic heart disease” (IHD) was  
35  
36 defined as a person with history of heart attack requiring hospitalization, or a person with physician-  
37  
38 diagnosed IHD who was taking medication as confirmed by the survey team. “Known stroke” was  
39  
40 defined as a person with a history of abrupt-onset weakness or paralysis on one side of the body, with  
41  
42 or without a history of hospitalization, or a person with physician-diagnosed stroke and currently  
43  
44 experiencing weakness or paralysis on one side of the body.  
45  
46

47 The mid-arm circumference was measured to use the appropriate cuff size (small, medium, and  
48  
49 large for mid-arm circumferences of 17-22 cm, 22-32 cm, and 32-42 cm respectively). Three  
50  
51 measurements of BP and pulse rate were taken at 2-min intervals on the dominant arm after a rest of at  
52  
53 least 15 min, in the seated position (7). Readings were obtained using a clinically validated  
54  
55 semiautomatic sphygmomanometer (HEM 705 IT; Omron Matsusaka Co Ltd, Japan). The average of  
56  
57 the last two readings for systolic and diastolic BP were defined as SBP1 and DBP1 respectively.  
58  
59 Anthropometric measurements were taken on standing participants wearing light clothes and without  
60  
61 shoes using standard techniques (13). Body weight was measured to the nearest 0.1 Kg using a spring  
62  
63 balance and height to the nearest 0.5 cm using a stadiometer. Waist and hip circumference was  
64  
65 measured to the nearest 0.1 cm. Finger prick blood samples were then obtained from fasting (>8h)

1  
2  
3 subjects (aged  $\geq 15$  years) to measure glucose (Accutrend system, Roche Diagnostics, Mannheim,  
4 Germany), cholesterol, and triglycerides blood values (MultiCare-in, HPS, Italy) using dry chemistry.  
5 The subject was then asked to void. A midstream specimen of urine was collected and dipstick test  
6 (Auction sticks, A.Menarini Diagnostics, Italy) was immediately performed and read manually to  
7 semiquantitate the occult blood (trace, 1+ to 4+) and protein (trace, 1+ to 4+). A new appointment was  
8 taken for non-fasting participants and for subjects who were menstruating. All subjects were then  
9 visited again within the next ten days by the same survey team using the same measurement devices  
10 and procedures for the second session of BP (SBP2 and DBP2) and fasting glucose (FG2)  
11 measurements.  
12  
13  
14  
15  
16  
17  
18  
19  
20

### 21 **Diagnostic criteria**

22 Arterial hypertension was defined as 1) systolic BP  $\geq 140$  mmHg and/or diastolic BP  $\geq 90$  mmHg  
23 and/or 2) self-reported use of antihypertensive drugs at the time of the interview (7). More precisely the  
24 prevalence of hypertension was based on values measured at the first visit (SBP1 and DBP1), at the  
25 second visit (SBP2 and DBP2), and on fulfilling the same criteria for hypertension on both visits.  
26 Awareness of hypertension was defined as self-report of any prior diagnosis of hypertension by a  
27 health care professional among the population defined as having hypertension. Hypertension treatment  
28 was defined as a self-reported use of antihypertensive drugs within the two weeks preceding the  
29 interview. Hypertension control was defined as systolic BP  $< 140$  mm Hg and diastolic BP  $< 90$  mm Hg.  
30 The proportion of hypertension control was relative to hypertensive treated with drugs.  
31  
32  
33  
34  
35  
36  
37  
38

39 Diabetes mellitus (DM) was defined as 1) fasting glucose (FG)  $\geq 7.0$  mmol/L at the two visits or  
40 2) self-reported use of hypoglycaemic medications at the time of the interview; impaired fasting  
41 glucose (IFG) as  $5.6 \leq \text{FG} < 7.0$  mmol/L in the absence of hypoglycaemic medications;  
42 normal FG as  $\text{FG} < 5.6$  mmol/L at the two visits (14). Overweight and obesity were defined as a body  
43 mass index (BMI) 25.0 to 29.9  $\text{kg/m}^2$ , and  $\geq 30$   $\text{kg/m}^2$  respectively. Abdominal obesity was defined as  
44 waist circumference  $> 102$  cm in men or  $> 88$  cm in women. Gender specific tertiles for BMI and waist-  
45 to-hip (W/H) ratio, were calculated using data of adult subjects without hypertension, normal FG,  
46 cholesterol  $< 5.0$  mmol/L, triglycerides  $< 1.7$  mmol/L, and no protein at urine dipstick test. Resulting  
47 cut-offs were 20.0 and 23.2  $\text{kg/m}^2$  for men and 20.5 and 24.3  $\text{kg/m}^2$  for women for BMI and 0.849 and  
48 0.907 in men and 0.815 and 0.887 in women for W/H ratio. On the basis of cholesterol and  
49 triglycerides assessments subjects were classified as high cholesterol ( $> 5.0$  mmol/l) or high  
50 triglycerides ( $> 1.7$  mmol/l) (7). Results of dipstick urinalysis were classified as no protein (0), protein  
51  
52  
53  
54  
55  
56  
57  
58  
59  
60

1  
2  
3 trace (+/-), or proteinuria ( $\geq+1$ ). A smoker was defined as one who smoked any form of tobacco on a  
4 daily (daily smoker) or a non-daily (occasional smoker) basis. Those who had smoked but had quit  
5 were designated as former smokers, and those who had never smoked at all were designated as never  
6 smokers. On the basis of education level subjects were classified into six levels: 1) illiterate; 2) can  
7 read and write; 3) primary school; 4) preparatory school; 5) secondary; 6) university or post. Fruit and  
8 vegetable consumption were classified as 1)  $\leq 1$  day/week; 2) 2-4 day/week; 3)  $\geq 5$  days/week.

14 Participants were categorized as: sedentary if they walked or cycled for less than 10 min daily, if  
15 their work did not involve intense physical activity, and they did not usually practice any sport or  
16 recreational physical activities; engaging in light to moderate physical activity if they performed work  
17 or recreational physical activities one or two days/week; engaging in vigorous physical activity if they  
18 performed work or recreational vigorous physical activities three days or more/week.

22 According to the ESH/ESC chart (7) risk stratification (average, low, moderate, high, and very  
23 high added risk categories) was based on the presence of risk factors (average of SBP1/SBP2 and  
24 DBP1/DBP2 graded in five categories; age  $>55$  years for men or  $>65$  years for women; daily smoking;  
25 waist circumference  $>102$  cm in men or  $>88$  cm in women; IFG; triglycerides  $>1.7$  mmol/L; total  
26 cholesterol  $>5.0$  mmol/L), DM, subclinical organ damage (protein trace at dipstick test), and  
27 established renal (proteinuria  $\geq 1+$  at dipstick test) or CV disease (self-reported stroke, myocardial  
28 infarction or peripheral artery disease). The cluster of three out of 4 risk factors among abdominal  
29 obesity, altered fasting plasma glucose, BP  $>130/85$  mmHg, and high triglycerides (as defined above),  
30 was considered as the presence of metabolic syndrome.

38 Measures have been taken to attain complete reliability and to reduce variation to reasonable  
39 limits. All study personnel successfully completed the specific one-week training programme organized  
40 in Sana'a (December 2007) on the aims of the study and the specific methods used to standardize the  
41 procedure for sampling and contacting individuals, questionnaire administration and form filling, BP  
42 measurements using electronic devices, performing blood biochemical assay, performing urine assay,  
43 and data entry into computerized data base. The training program included a pilot testing performed on  
44 a population sample of 400 individuals in urban and rural areas of Sana'a.

### 52 53 **Statistical methods**

54 A sample size of at least 1,117 subjects was required to achieve a 1% precision around an  
55 estimated prevalence of diabetes of 3% with 95% confidence level (CI). Estimated required sample size  
56 for two-sample comparison of diabetes prevalence of 2.25% vs 3.75% with the assumption of 0.05  
57  
58  
59

1  
2  
3 alpha (two-sided), 80% power, was 2,161 subjects for each group. Cleaning the data, handling missing  
4 data, and outliers were done according to the guidelines of WHO for STEPS data management (12).  
5 Prevalence estimates were calculated for the five age groups in the overall population and by gender.  
6 Data are expressed as mean±SD with 95% CI for continuous variables, and as rates with 95% CI for  
7 categorical variables. Prevalence was also weighted to represent the total Yemen population aged 15-69  
8 years (2008 estimated Yemen population) (11,16), and age-standardized for age ranges 15-69 years  
9 using WHO World Standard Population (17). For hypertension awareness, and treatment the analysis  
10 was done on the subpopulation of hypertensive patients; for hypertension control, analysis was done on  
11 the subpopulation of treated people. As there were no national data available for these two  
12 subpopulations for the purpose of weighting, at this stage of analysis, we did not weight the data.  
13 Prevalence rates were compared using  $\chi^2$  analysis and Risk Ratio (RR) (16). When appropriate, test of  
14 hypothesis was done at significance level 0.05 two sided. Associations between socio-demographic,  
15 anthropometric, and clinical factors and the prevalence of hypertension were explored with logistic  
16 regression analysis, the diagnosis of hypertension being entered as dependent dichotomic variable.  
17 Results of regression analysis are expressed as RR with 95% CI for each independent variable (20). All  
18 analyses were performed with SPSS software, version 17.0 (SPSS).  
19  
20  
21  
22  
23  
24  
25  
26  
27  
28  
29  
30  
31  
32  
33  
34  
35  
36  
37  
38  
39  
40  
41  
42  
43  
44  
45  
46  
47  
48  
49  
50  
51  
52  
53  
54  
55  
56  
57  
58  
59  
60



## RESULTS

### Characteristics of study population

Characteristics of HYDY participants are reported in Table 1. Distribution among age decades and living location (urban, rural) were identical among men and women. Overall, the prevalence of illiterate subjects was higher in women (51%) than in men (19%). The prevalence of obesity and abdominal obesity were also higher in women (13.4%; 95%CI 12.5 to 14.4; and 26.5%; 25.3 to 27.7) than in men (6.9%; 6.2 to 7.6; and 3.4%; 2.9 to 3.9).

All subjects received two visits at home separated by a median interval of 5.36 days (95% CI 5.30 to 5.42; range 1 to 13 days), with no differences between gender. The average of the last two of the three BP and heart rate readings taken at each visit is reported in Table 1. Values measured at visit 2 were lower than values obtained at visit 1 both in men and in women.

### Hypertension rate and diagnostic criteria

Overall the rate of hypertension at visit 1 was 19.1% (95% CI 18.3-19.8), being 15.9% (15.2-16.6) at visit 2. In particular 1307 and 7930 participants were found to be hypertensive and normotensive at both visits respectively; 642 subjects had an hypertension diagnosis at visit 1 only, whereas 317 were hypertensive at visit 2 only (chi-squared test  $P < 0.001$ ). Therefore when the diagnosis was based on fulfilling the same criteria on both visits the estimated hypertension rate was lowered by 33% (12.8%; 12.1-13.4). When data were standardized to the Yemen population (15-69 years) prevalence was 7.7% (95% CI 7.2 to 8.1). This value, considering both the two visits, is lower than estimations obtained when visit 1 (12.8%; 95% CI: 12.2 to 13.4), or visit 2 (10.5%; 95% CI: 9.9 to 11.0) are considered independently (Figure 1). Hypertension prevalence age-standardized to the WHO world population 2001 aged 15-69 years was 11.3% (10.7 to 11.9) when based on both visits and 17.3% (16.5 to 10.0) when based on the first visit (gender specific values are reported in Table 2).

Overall 528 subjects were on antihypertensive treatment. Rates of awareness and treatment importantly varied according to the criteria adopted for hypertension diagnosis being higher when based on the results of both visits. The estimation of control rates was more restrictive when based on the result of both visits than of single visits (Table 2). In both genders the proportion of hypertensive subjects aware of their hypertension, the proportion of subjects under current treatment increased with age. Conversely, as expected, the proportion of treated subjects whose hypertension was controlled decreased with age (Table 2). When excluding individuals already on antihypertensive drug treatment

1  
2  
3 and estimating hypertension prevalence on BP measurements, the rate of hypertension among  
4 participants was 17.2% (16.4-18.0) at visit 1 (n=1425), 12.8% (12.1-13.5) at visit 2 (n=1098), 8.7%  
5 (8.1-9.3) of subjects (n=779) fulfilling the criteria at both visits.  
6  
7  
8  
9

### 10 **Factors affecting misclassification of hypertension at visit one**

11 When considering untreated subjects, 53% out of the 1094 participants who had hypertension  
12 Grade 1 at the first visit, and 24% out of the 239 subjects with hypertension Grade 2, did not fulfil the  
13 criteria for hypertension at visit 2 reassessment. Conversely only 8% out of the 92 untreated  
14 participants with Grade 3 hypertension had normal BP values at visit 2 reassessment. Misclassification  
15 also varied by subject age. The younger the subjects were, the wider the difference was between  
16 estimates based on one or two visits (Table 2). As a result only 43% of men, and 44% of women <35  
17 years of age found to be hypertensive at visit one were hypertensive at both visits. These percentages  
18 were 72% and 76% for men and women aged >45 years of age (Table 3).  
19  
20  
21  
22  
23  
24  
25

26 When characteristics of misclassified participants were compared to untreated subjects with  
27 hypertension diagnosis confirmed at both visits (logistic regression analysis including 1396 subjects),  
28 misclassification was found to be independent by gender, education level, BMI and W/H ratio tertiles.  
29 The probability to have the diagnosis confirmed was directly associated with age decades, grade of  
30 hypertension, provisional diagnosis of diabetes at visit 1 (FG  $\geq 7.0$  mmol/L or self-reported use of  
31 hypoglycaemic medications), and proteinuria  $\geq 1+$  at dipstick test.  
32  
33  
34  
35  
36

37 Rates of proteinuria ( $\geq 1+$  at dipstick test), or the self-report of CV disease (MI,stroke,POAD) at  
38 questionnaire, were comparable among subjects classified as hypertensive at the first, the second, or at  
39 both visits (Table 3). However, the 959 participants found to be hypertensive at visit 1 or at visit 2 only  
40 and thus excluded from the final diagnosis of hypertension (not confirmed), had rates of proteinuria and  
41 self-reported CV disease comparable with normotensive subjects (at both visits) and the general  
42 population (Table 4).  
43  
44  
45  
46  
47  
48

### 49 **Cardiovascular risk stratification after one or two visits**

50 BP readings taken at the first visit (SBP1/DBP1) or average of BP readings taken at the first and  
51 the second visits (SBP1-SBP2/DBP1-DBP2) were used to stratify HYDY participants in the five BP  
52 categories according to ESH/ESC guidelines (7). As indicated by Figure 2 the different prevalence of  
53 hypertension when the diagnosis rely on measurements taken at the first visit or at two visits is mainly  
54 due to misclassification of subjects with Grade 1 hypertension.  
55  
56  
57  
58  
59  
60



1  
2  
3 CV risk stratification according to the ESH/ESC chart (7) using average BP values at visit1 and  
4 at both visits is reported in Table 5. Most people had average or low 10-year CV risk, and a large  
5 fraction (84.3% after visit 1 and 86.2% after two visits) had CV risk <20% (average, low, or moderate).  
6  
7 The age weighted percentage of the population with a CV risk  $\geq 20\%$  (high, or very high CV risk) was  
8  
9 13.8% after visit 1 and 12.0% after two visits (Table 5). Overall, only 1.9% of Yemen population  
10  
11 classified at high or very high CV risk at visit 1 moved to average, low, or moderate CV risk categories  
12  
13 after two visits (Figure 3).  
14  
15  
16  
17  
18  
19  
20  
21  
22  
23  
24  
25  
26  
27  
28  
29  
30  
31  
32  
33  
34  
35  
36  
37  
38  
39  
40  
41  
42  
43  
44  
45  
46  
47  
48  
49  
50  
51  
52  
53  
54  
55  
56  
57  
58  
59  
60

## DISCUSSION

This study provides helpful results to clarify the impact of survey strategy on the final estimation of hypertension burden in developing countries. One of the major contribution is the information that a strategy based on two visits allows to exclude from final diagnosis subjects at low CV risk with a resultant 35% reduction of the estimated prevalence of hypertension. This information is essential for estimating drug costs and budget allocation in national prevention programs.

The fall in BP over repeated readings mainly rely to a transient elevation of BP in persons submitted to BP measurements, and was reported to be inversely related with age and directly related to BP values (8). From a clinical prospective, the uncertainty about the patient's true BP at clinic measurement may cause uncertainty in treatment decisions (18). Therefore, guidelines for clinical practice commonly recommend that the diagnosis of hypertension rely on multiple measurements obtained at different visits (6,7). At population level, the relevant logistic difficulties and personnel costs of a strategy based on two separate visits, and the negative prognostic role of high BP variability and episodic hypertension (10), may sometimes lead to accept the adoption of a single visit strategy. Ignoring the difference in hypertension definition criteria may however lead to erroneous conclusions when comparing results of surveys assessing the prevalence of hypertension, awareness, and control in different countries (19). In two epidemiological studies where the estimation of hypertension prevalence based on two visits was compared with the estimation based on a single visit, the reduction was 12% in a cohort of subjects aged  $62 \pm 11$  years (9), being  $>35\%$  in a cohort of subjects aged  $39 \pm 9$  years (20). In particular, two thirds of men  $<30$  years of age had normal BP values at the second visit (20). In both studies, the majority of subjects misclassified as hypertensive were in the less severe hypertensive grade (9,20). In a recent small surveys the estimation of hypertension prevalence had, as expected, a strong association with the presence of left ventricular hypertrophy independently from diagnostic criteria (one or two visits) (9). However, the most critical issue, the CV risk of subjects excluded from final diagnosis, is still poorly investigated. This information is especially crucial in low resource setting where budget allocation to CV prevention programs might compete with other priorities. HYDY study participants were stratified by cardiovascular risk according to ESH/ESC criteria (7) thus allowing to investigate characteristics of misclassified subjects. Subjects misclassified at first visit most frequently belonged to low or moderate CV risk categories, having a rate of proteinuria comparable to the general population and to subjects found to be normotensive at both visits. This does not necessarily imply that subjects with high blood pressure at both visits are "real" hypertensives but that they are higher risk hypertensives. Therefore when resources are limited the

1  
2  
3 estimation of hypertension prevalence might be based on only one visit, while resources can be more  
4 efficiently used to target high-risk people who will benefit the most.  
5  
6

7 Heart attack and stroke are preventable either through conventional management of single risk  
8 factors (hypertension), or by applying a total CV risk approach which could permit providers to  
9 focalize drug treatment use only in high risk subjects. CV risk has a continuous relationship with BP  
10 values. In particular, the present study clarify that although there is a large discrepancy (35%) in the  
11 estimation of hypertension prevalence on the basis of one visit or two visits, only 1.9% of the Yemen  
12 population classified at high or very high CV risk at visit 1 moved to average, low, or moderate CV  
13 risk categories after two visits. Current treatment strategies are indeed based on CV risk stratification.  
14 It is recommended that pharmacologic treatment should be provided for all people when their  
15 calculated 10-year CV risk is at least 30% or more. The risk threshold can be lowered to 20% if and  
16 when resources permit. More precisely, age weighted prevalence of subjects at very high CV risk  
17 estimated after one visit did not differ vs the estimation based on the two visits strategy. A mild  
18 difference is appreciable only when the 20% threshold is adopted, corresponding to an estimated  
19 number of 227,000 Yemen patients aged 15-69 years.  
20  
21

22 The age-standardized prevalence of hypertension at first visit for subjects aged 15-69 years  
23 (16.2%) is markedly lower than rates reported in economically developed countries for subjects older  
24 than 20 years (37.3%) (2). Most importantly, direct age standardization to the 35-69 years WHO World  
25 Standard Population (17) (26.6%; 25.5 to 27.6), allows comparison with Egypt (33.8%) (21), Iran  
26 (34.1%) (22), or Turkey (34.2%) (23). The low prevalence of hypertension, besides any methodological  
27 consideration, might thus be related to the possibility that Yemen is behind in the epidemiological  
28 transition currently ongoing in other countries of the Middle East Crescent area.  
29  
30

31 In conclusion, according to present data, the choice of one or two visits strategy is not relevant,  
32 but it is important to implement a strategy that allows for a more comprehensive framework of CV risk.  
33  
34  
35  
36  
37  
38  
39  
40  
41  
42  
43  
44  
45  
46  
47  
48  
49  
50  
51  
52  
53  
54  
55  
56  
57  
58  
59  
60

## HYDY Study Group

Steering Committee: Pietro Amedeo Modesti (Chair), Husni Al Goshae, Mohamed

Bamoshmoosh, Dawood Al-Hidabi, Gian Franco Gensini, Marzia Baldereschi, Stefano Rapi, Luciano Massetti. Monitoring Board: Mohamed Shamsuddin, Hameed M.Akhan, Mahdy Al-Karewany, Abdul-Malik Al-Amrany, Ferdaws Al-Jilani; Data Center: Ammar Al-Ghadi, Giulia Elisa Cambi, Antonella Ferrari.

## Acknowledgments

We thank the many enthusiastic workers in Yemen who have contributed to the study: *Capital area*: Hisham Abdulrab Ali Al Qubati, Raed Faisal Nasser, Aziz Hussain Ali Moshoe, Mohammed Abdulah Ashmeni, Abdulhamed Hulfy Alanashany, Mohammed Ibrahim Ahmed Al Hamali, Naif Radman Hamdan Agial, Sami Abduh Kaid Ahmed Alwessaby, Munera Abduwhab Saleh Yahya, Hyam Abdul Kareem Al Hyfi, Ziad Abdullah Mohammed Al Mass, Liza Nayib Shamiri, Sahar Ahmed Abdullah Moqbel, Abdullah Assan Mohammed Guly, Abdulaziz Saeed Salem Bawazir, Abi Saleh Al Rawi, Kaled Sadeg Ali Al-Shaibari, Abdul Bari Mahfoudh Omar Al Daba, Osama Hadi Abdu Haig, Gamil Al Hamdi Abdo Mohsan; *Inland area*: Khalil Abdulwahid Ali Al-Kuhlani, Fahd Ahmed Ahmed Ali Al Durafi, Moad Ahmed Abdul Al Kareem Al Shorihy, Ashra F Saheed Abdalh, Omar Ahmed Abdul Aziz, Kalil Abdu Mohammed Assufi, Ahmed Saeed Ahmed Al Terin, Mamon Ahdo Alrahmen Alp, Fuad Mohammed Ali Abdu Ghaleb, Mohammed Ali Hussien, Mobark Mohammad Dabwan Quasem, Awad Hamad Mohammad; *Coastal area*: Yasin Mohammad Al Hay Ibrahim, Abdu Al Aleem Qaid Abdu Al Aleem Safian, Mohammed Ali Mohammed Salman, Abdh Kozim Abdullah Al Nhozy, Mohammed Awad Omer Hydhi, Hussein Omar Al Ahbari, Adel Hai Bin Obedellah, Khalid Hussan Khaleby. We would also like to thank the chiefs and elders of the villages for their help and Margaret O'Neill for her editorial assistance.

## Disclosures

All authors have completed the Unified Competing Interest form at [www.icmje.org/coi\\_disclosure.pdf](http://www.icmje.org/coi_disclosure.pdf) (available on request from the corresponding author) and declare: no support from any organisation for the submitted work; no financial relationships with any organisations that might have an interest in the submitted work in the previous 3 years; no other relationships or activities that could appear to have influenced the submitted work.

## Details of contributors

PAM, SR, MoB, and MaB drafted the manuscript. PAM, SR, MoB, MaB, LM, GFG, DAH, and HAG were involved in the conception and design of the study. DAH, and HAG were part of the project

1  
2  
3 management team that coordinated data collection for the study. PAM, and MaB wrote the statistical  
4 analysis plan; PAM, SR, and LM conducted the main analyses and provided statistical advice; DZ  
5 revised the draft paper. All authors had access to all data sources, contributed to the interpretation of  
6 results, commented on the report, and approved the final version for publication. PAM is the guarantor.  
7  
8  
9

### 10 **Details of all sources of funding for the study**

11  
12 HYDY project is part of the Executive Programme of Scientific and Technological Cooperation  
13 between Italy and Yemen for the years 2006-09. This work was supported by a grant from the  
14 Ministero dell'Università e della Ricerca (Direzione Generale per le strategie e lo sviluppo  
15 dell'internazionalizzazione della ricerca scientifica e tecnologica), Rome, Italy and Menarini  
16 International Operations Luxembourg SA.  
17  
18  
19

20  
21 All researchers were independent from funders.

22  
23 Funders, had no role in study design; in the collection, analysis, and interpretation of data; in the  
24 writing of the report; and in the decision to submit the article for publication.  
25

### 26 **Statements**

27  
28 The Corresponding Author has the right to grant on behalf of all authors and does grant on behalf  
29 of all authors, a worldwide licence to the Publishers and its licensees in perpetuity, in all forms, formats  
30 and media (whether known now or created in the future), to i) publish, reproduce, distribute, display  
31 and store the Contribution, ii) translate the Contribution into other languages, create adaptations,  
32 reprints, include within collections and create summaries, extracts and/or, abstracts of the Contribution,  
33 iii) create any other derivative work(s) based on the Contribution, iv) to exploit all subsidiary rights in  
34 the Contribution, v) the inclusion of electronic links from the Contribution to third party material  
35 where-ever it may be located; and, vi) licence any third party to do any or all of the above.  
36  
37  
38  
39  
40  
41

42 All authors, external and internal, had full access to all of the data (including statistical reports  
43 and tables) in the study and can take responsibility for the integrity of the data and the accuracy of the  
44 data analysis.  
45  
46

### 47 **Data sharing**

48  
49 There is no additional data available.  
50  
51  
52  
53  
54  
55  
56  
57  
58  
59  
60

**REFERENCES**

1. Rodgers A, Vaughan P. World Health Report 2002: Reducing Risks, Promoting Healthy Life. Geneva, Switzerland: World Health Organization; 2002. Available at URL: <http://www.who.int/whr/2002/en/> Accessed January 26, 2012.
2. Kearney PM, Whelton M, Reynolds K, et al. Global burden of hypertension: analysis of worldwide data. *Lancet*. 2005;365:217-23.
3. Yusuf S, Reddy S, Ounpuu S, et al. Global burden of cardiovascular diseases: part I: general considerations, the epidemiologic transition, risk factors, and impact of urbanization. *Circulation*. 2001;104:2746-53.
4. Global health risks: mortality and burden of disease attributable to selected major risks. WHO, Geneva, 2009: [http://www.who.int/healthinfo/global\\_burden\\_disease/global\\_health\\_risks/en/index.html](http://www.who.int/healthinfo/global_burden_disease/global_health_risks/en/index.html). Accessed January 26, 2012.
5. Pereira M, Lunet N, Azevedo A, Barros H; Differences in prevalence, awareness, treatment and control of hypertension between developing and developed countries. *J Hypertens* 2009;27:963-75.
6. 1999 World Health Organization-International Society of Hypertension Guidelines for the Management of Hypertension. Guidelines Subcommittee. *J Hypertens*. 1999;17:151-83.
7. Mancia G, De Backer G, Dominiczak A, et al.; Management of Arterial Hypertension of the European Society of Hypertension; European Society of Cardiology. 2007 Guidelines for the Management of Arterial Hypertension: The Task Force for the Management of Arterial Hypertension of the European Society of Hypertension (ESH) and of the European Society of Cardiology (ESC). *J Hypertens*. 2007;25:1105-87.
8. Bovet P, Gervasoni JP, Ross AG, et al: Assessing the prevalence of hypertension in populations: are we doing it right? *J Hypertens*. 2003;21:509-17.
9. Figueiredo D, Azevedo A, Pereira M, et al. Definition of hypertension: the impact of number of visits for blood pressure measurement. *Rev Port Cardiol* 2009; 28: 775-83
10. Rothwell PM, Howard SC, Dolan E, et al: Prognostic significance of visit-to-visit variability, maximum systolic blood pressure, and episodic hypertension. *Lancet*. 2010; 375: 895-905.
11. U.S. Census Bureau. International Data Base (IDB). Midyear Population by Age and Sex: Yemen: 2008. <http://www.census.gov/population/international/data/idb/country.php>. Accessed January 26, 2012.
12. WHO STEP programme. <http://www.who.int/chp/steps/en/>. Accessed January 26, 2012.

- 1  
2  
3 13.Tolonen H,Kuulasmaa K,Laatikainen T, et al. Recommendation for indicators,international  
4 collaboration,protocol and manual of operations for chronic disease risk factor surveys.(2002).  
5 <http://www.ktl.fi/publications/ehrm/product2/title.htm>. Accessed January 26, 2012.  
6  
7
- 8 14.American Diabetes Association.Diagnosis and Classification of Diabetes Mellitus.*Diabetes Care*  
9 2008;31:S55-S60.  
10
- 11 15.Executive summary of the third report of the National Cholesterol Education Program (NCEP)  
12 expert panel on detection,evaluation,and treatment of high blood cholesterol in adults (Adult  
13 Treatment Panel III).*JAMA* 2001;285:2486–97.  
14
- 15 16.Rothman KJ,Greenland S,Lash TL. Modern Epidemiology 3rd Ed.Philadelphia: Lippincott Williams  
16 & Wilkins,2008.  
17
- 18 17.Ahmad O,Boschi-Pinto C,Lopez AD, et al. Age standardization of rates: a new WHO standard.GPE  
19 Discussion Paper Series: No.31,World Health Organization,2001.  
20  
21 <http://www.who.int/healthinfo/paper31.pdf>. Accessed January 26, 2012.  
22  
23
- 24 18.Kerr EA, Zikmund-Fisher BJ, Klamerus ML, et al. The role of clinical uncertainty in treatment  
25 decisions for diabetic patients with uncontrolled blood pressure. *Ann Intern Med.* 2008;148:717-  
26 27.  
27
- 28 19.Birkett NJ. The effect of alternative criteria for hypertension on estimates of prevalence and control.  
29 *J Hypertens.* 1997;15:237-44.  
30  
31
- 32 20.Lang T, de Gaudemaris R, Chatellier G, et al. Epidemiology Group of the Société Française  
33 d'Hypertension Artérielle and the IHPAF Working Physicians Group. Prevalence and therapeutic  
34 control of hypertension in 30,000 subjects in the workplace. *Hypertension.* 2001;38:449-54.  
35  
36
- 37 21. Ibrahim MM, Rizk H, Appel LJ, et al. Hypertension prevalence, awareness, treatment, and control  
38 in Egypt. Results from the Egyptian National Hypertension Project (NHP). NHP Investigative  
39 Team. *Hypertension* 1995; 26: 886-90.  
40  
41
- 42 22. Ebrahimi M, Mansournia MA, Haghdoost AA, et al. Social disparities in prevalence, treatment and  
43 control of hypertension in Iran: second National Surveillance of Risk Factors of  
44 Noncommunicable Diseases,2006. *J Hypertens* 2010; 28: 1620-9.  
45  
46
- 47 23. Sönmez HM, Başak O, Camci C, et al. The epidemiology of elevated blood pressure as an estimate  
48 for hypertension in Aydin, Turkey. *J Hum Hypertens* 1999; 13: 399-404.  
49  
50  
51  
52  
53  
54  
55  
56  
57  
58  
59  
60



**Table 1.** Characteristics of HYDY study participants.

|                                            | Men                 | Women               |
|--------------------------------------------|---------------------|---------------------|
| Participants, n                            | 5063                | 5179                |
| Living in urban location, n (%)            | 2519 (49.8)         | 2590 (50.0)         |
| Age (years), mean (95% CI)                 | 39.4 (39.0 to 39.9) | 39.2 (38.7 to 39.6) |
| 15–24 years, n (%)                         | 1016 (20.1)         | 1058 (20.4)         |
| 25–34 years, n (%)                         | 1020 (20.1)         | 1047 (20.2)         |
| 35–44 years, n (%)                         | 1008 (19.9)         | 1021 (19.7)         |
| 45–54 years, n (%)                         | 990 (19.6)          | 1057 (20.4)         |
| 55–69 years, n (%)                         | 1029 (20.3)         | 996 (19.2)          |
| Smokers (daily), n (%)                     | 1428 (28.2)         | 458 (8.8)           |
| Education (years), mean (95% CI)           | 7.7 (7.5 to 7.9)    | 4.4 (4.2 to 4.5)    |
| Illiterate, n (%)                          | 986 (19.5)          | 2666 (51.5)         |
| Can read and write, n (%)                  | 830 (16.4)          | 375 (7.2)           |
| Primary school, n (%)                      | 685 (13.5)          | 661 (12.8)          |
| Secondary school, n (%)                    | 832 (16.4)          | 542 (10.5)          |
| High school, n (%)                         | 774 (15.3)          | 504 (9.7)           |
| College or post, n (%)                     | 950 (18.8)          | 428 (8.3)           |
| Self-reported physical activity, n (%)     |                     |                     |
| Sedentary                                  | 914 (21.1)          | 1465 (32.8)         |
| Light to moderate                          | 2606 (60.1)         | 2586 (57.9)         |
| Vigorous                                   | 814 (18.8)          | 418 (9.4)           |
| Self-reported fruit consumption, n (%)     |                     |                     |
| ≤1 day/week                                | 2357 (46.7)         | 2470 (47.8)         |
| 2-4 day/week                               | 1947 (38.6)         | 1962 (37.9)         |
| ≥5 days/week                               | 744 (14.7)          | 740 (14.3)          |
| Self-reported vegetable consumption, n (%) |                     |                     |
| ≤1 day/week                                | 1101 (21.8)         | 1040 (20.1)         |
| 2-4 day/week                               | 1362 (26.9)         | 1437 (27.8)         |
| ≥5 days/week                               | 2597 (51.3)         | 2692 (52.1)         |



|                                                  |                        |                           |
|--------------------------------------------------|------------------------|---------------------------|
| Treated with antihypertensive drugs, n           | 215                    | 313                       |
| Height (cm), mean (95% CI)                       | 161.6 (161.4 to 161.8) | 153.1 to (152.9 to 153.3) |
| Weight (kg), mean (95% CI)                       | 60.5 (60.1 to 60.9)    | 56.9 (56.5 to 57.3)       |
| Waist circumference (cm), mean (95% CI)          | 78.5 (78.1 to 78.9)    | 80.0 (79.6 to 80.4)       |
| Abdominal obesity, n (%)                         | 171 (3.4)              | 1372 (26.5)               |
| BMI (kg/m <sup>2</sup> ), mean (95% CI)          | 23.1 (22.9 to 23.3)    | 24.3 (24.1 to 24.5)       |
| Overweight (25.0-29.9 kg/m <sup>2</sup> ), n (%) | 1174 (23.2)            | 1321 (25.5)               |
| Obesity (≥30.0 kg/m <sup>2</sup> ), n (%)        | 349 (6.9)              | 695 (13.4)                |
| High cholesterol (≥5 mmol/L), n (%)              | 593 (11.7)             | 803 (15.5)                |
| High triglycerides (≥1.7 mmol/L), n (%)          | 2007 (39.6)            | 1887 (36.4)               |
| Diabetes                                         | 257 (5.1)              | 281 (5.4)                 |
| Interval between visits (days), mean (95% CI)    | 5.2 (5.2 to 5.3)       | 5.5 (5.4 to 5.6)          |
| First visit (mean, 95% CI)                       |                        |                           |
| Systolic BP (mmHg)                               | 123.0 (122.6 to 123.4) | 122.7 (122.1 to 123.3)    |
| Diastolic BP (mmHg)                              | 76.9 (76.5 to 77.3)    | 76.9 (76.7 to 77.1)       |
| Heart rate (mmHg)                                | 79.3 (79.1 to 79.5)    | 2.2 (82.0 to 82.4)        |
| Air temperature (°C)                             | 24.4 (24.2 to 24.6)    | 24.3 (24.1 to 24.5)       |
| Second visit (mean, 95% CI)                      |                        |                           |
| Systolic BP (mmHg)                               | 121.5 (121.1 to 121.9) | 120.6 (120.2 to 121.0)    |
| Diastolic BP (mmHg)                              | 76.2 (76.0 to 76.4)    | 76.0 (75.8 to 76.2)       |
| Heart rate (mmHg)                                | 78.5 (78.3 to 78.7)    | 81.1 (80.9 to 81.3)       |
| Air temperature (°C)                             | 24.4 (24.2 to 24.6)    | 24.2 (24.0 to 24.4)       |
| Dipstick test ≥1+, n (%)                         | 339 (6.7)              | 270 (5.2)                 |
| Self report of MI,Stroke,POAD, n (%)             | 47 (0.9)               | 38 (0.7)                  |

**Table 2.** Prevalence of hypertension, and awareness based on the first visit (visit 1), the second visit (visit 2), or both visits to the 10242 study participants

|                       | Hypertension     |                  |                  |       | Awareness among hypertensive subjects |                  |                  |       |
|-----------------------|------------------|------------------|------------------|-------|---------------------------------------|------------------|------------------|-------|
|                       | Visit 1          | Visit 2          | Both             | Δ     | Visit 1                               | Visit 2          | Both             | Δ     |
| <b>Men (n=5063)</b>   |                  |                  |                  |       |                                       |                  |                  |       |
| Age decades, n (%)    |                  |                  |                  |       |                                       |                  |                  |       |
| 15–24 years           | 48 (4.7)         | 42 (4.2)         | 15 (1.5)         | -68.1 | 4 (8.3)                               | 4 (9.5)          | 4 (26.7)         | 220.0 |
| 25–34 years           | 82 (8.0)         | 68 (6.7)         | 41 (4.0)         | -50.0 | 13 (15.9)                             | 13 (19.1)        | 13 (31.7)        | 100.0 |
| 35–44 years           | 142 (14.1)       | 101 (10.0)       | 73 (7.2)         | -48.6 | 20 (14.1)                             | 20 (19.8)        | 20 (27.4)        | 94.5  |
| 45–54 years           | 263 (26.6)       | 234 (23.7)       | 188 (19.0)       | -28.7 | 85 (32.3)                             | 85 (36.3)        | 85 (45.2)        | 39.9  |
| 55–69 years           | 375 (36.5)       | 315 (30.6)       | 272 (26.4)       | -27.5 | 118 (31.5)                            | 118 (37.5)       | 118 (43.4)       | 37.9  |
| Prevalence, % (95%CI) |                  |                  |                  |       |                                       |                  |                  |       |
| Crude                 | 18.0 (16.9-19.1) | 15.0 (14.0-16.0) | 11.6 (10.8-12.5) | -35.3 | 26.4 (23.7-29.4)                      | 31.3 (28.1-34.7) | 39.9 (36.0-43.9) | 54.5  |
| Age standardized*     | 16.2 (15.1-17.3) | 13.5 (12.5-14.4) | 10.2 (9.4-11.0)  | -37.0 | -                                     | -                | -                | -     |
| <b>Women (n=5179)</b> |                  |                  |                  |       |                                       |                  |                  |       |
| Age decades, n (%)    |                  |                  |                  |       |                                       |                  |                  |       |
| 15–24 years           | 56 (5.3)         | 40 (3.8)         | 17 (1.6)         | -69.7 | 1 (1.8)                               | 1 (2.5)          | 1 (5.9)          | 229.4 |
| 25–34 years           | 97 (9.3)         | 68 (6.5)         | 46 (4.4)         | -52.6 | 16 (16.5)                             | 16 (23.5)        | 16 (34.8)        | 110.9 |

|                       |                  |                  |                  |       |                  |                  |                  |      |
|-----------------------|------------------|------------------|------------------|-------|------------------|------------------|------------------|------|
| 35–44 years           | 163 (16.0)       | 136 (13.4)       | 105 (10.3)       | -35.6 | 54 (33.1)        | 54 (39.7)        | 54 (51.4)        | 55.2 |
| 45–54 years           | 371 (35.1)       | 325 (30.8)       | 285 (27.0)       | -23.2 | 138 (37.2)       | 138 (42.5)       | 138 (48.4)       | 30.2 |
| 55–69 years           | 356 (35.7)       | 297 (29.8)       | 265 (26.6)       | -25.6 | 133 (37.4)       | 133 (44.8)       | 133 (50.2)       | 34.3 |
| Prevalence, % (95%CI) |                  |                  |                  |       |                  |                  |                  |      |
| Crude                 | 20.1 (19.1-21.2) | 16.7 (15.7-17.8) | 13.9 (12.9-14.8) | -31.2 | 33.8 (31.0-36.8) | 39.8 (36.6-43.1) | 46.9 (43.3-50.6) | 45.3 |
| Age standardized*     | 18.3 (17.2-19.4) | 15.1 (14.1-16.1) | 12.3 (11.4-13.2) | -32.8 | -                | -                | -                | -    |

$\Delta$  = (percentage based on visit 1 – percentage based on both visits)/ percentage based on visit 1

\* to the WHO standard population 2001

**Table 3.** Prevalence of treatment and control based on the first visit (visit 1), the second visit (visit 2), or both visits to the 10242 study participants.

|                       | Current treatment among hypertensive subjects |                  |                  |       | BP control among treated subjects |                  |                  |       |
|-----------------------|-----------------------------------------------|------------------|------------------|-------|-----------------------------------|------------------|------------------|-------|
|                       | Visit 1                                       | Visit 2          | Both             | Δ     | Visit 1                           | Visit 2          | Both             | Δ     |
| <b>Men (n=5063)</b>   |                                               |                  |                  |       |                                   |                  |                  |       |
| Age decades, n (%)    |                                               |                  |                  |       |                                   |                  |                  |       |
| 15–24 years           | 3 (6.3)                                       | 3 (7.1)          | 3 (20.0)         | 220.0 | 1 (33.3)                          | 1 (33.3)         | 1 (33.3)         | -     |
| 25–34 years           | 10 (12.2)                                     | 10 (14.7)        | 10 (24.4)        | 100.0 | 3 (30.0)                          | 2 (20.0)         | 0 (0.0)          | -     |
| 35–44 years           | 17 (12.0)                                     | 17 (16.8)        | 17 (23.3)        | 94.5  | 7 (41.2)                          | 9 (52.9)         | 7 (41.2)         | -     |
| 45–54 years           | 73 (27.8)                                     | 73 (31.2)        | 73 (38.8)        | 39.9  | 19 (26.0)                         | 23 (31.5)        | 14 (19.2)        | -26.3 |
| 55–69 years           | 112 (29.9)                                    | 112 (35.6)       | 112 (41.2)       | 37.9  | 19 (17.0)                         | 33 (29.5)        | 15 (13.4)        | -21.1 |
| Prevalence, % (95%CI) |                                               |                  |                  |       |                                   |                  |                  |       |
| Crude                 | 23.6 (20.9-26.5)                              | 28.3 (25.2-31.6) | 36.5 (32.7-40.5) | 54.5  | 22.8 (17.7-28.8)                  | 31.6 (25.8-38.1) | 17.2 (12.8-22.6) | -24.5 |
| <b>Women (n=5179)</b> |                                               |                  |                  |       |                                   |                  |                  |       |
| Age decades, n (%)    |                                               |                  |                  |       |                                   |                  |                  |       |
| 15–24 years           | 1 (1.8)                                       | 1 (2.5)          | 1 (5.9)          | 229.4 | 0 (0.0)                           | 0 (0.0)          | 0 (0.0)          | -     |
| 25–34 years           | 13 (13.4)                                     | 13 (19.1)        | 13 (28.3)        | 110.9 | 8 (61.5)                          | 9 (69.2)         | 6 (46.2)         | -25.0 |
| 35–44 years           | 50 (30.7)                                     | 50 (36.8)        | 50 (47.6)        | 55.2  | 27 (54.0)                         | 29 (58.0)        | 22 (44.0)        | -18.5 |

|                       |                  |                  |                  |      |                  |                  |                  |       |
|-----------------------|------------------|------------------|------------------|------|------------------|------------------|------------------|-------|
| 45–54 years           | 124 (33.4)       | 124 (38.2)       | 124 (43.5)       | 30.2 | 36 (29.0)        | 47 (37.9)        | 31 (25.0)        | -13.9 |
| 55–69 years           | 125 (35.1)       | 125 (42.1)       | 125 (47.2)       | 34.3 | 38 (30.4)        | 41 (32.8)        | 31 (24.8)        | -18.4 |
| Prevalence, % (95%CI) |                  |                  |                  |      |                  |                  |                  |       |
| Crude                 | 30.0 (27.3-32.9) | 36.1 (33.0-39.4) | 43.6 (40.0-47.2) | 45.3 | 34.8 (29.7-40.2) | 40.3 (35.0-45.7) | 28.7 (24.0-34.0) | -17.4 |

$\Delta = (\text{percentage based on visit 1} - \text{percentage based on both visits}) / \text{percentage based on visit 1}$

**Table 4.** Rates of proteinuria and self-reported CV disease in HYDY participants found to be hypertensive at visit 1, at visit 2, or at both visits, in subjects finally excluded from the final diagnosis of hypertension (not confirmed), in normotensive subjects and in all participants.

| Diagnosis               | Subjects | DIPSTIK test $\geq 1+$ |                   | Self-report of CV disease |                  |
|-------------------------|----------|------------------------|-------------------|---------------------------|------------------|
|                         | n        | n                      | % (95% CI)        | n                         | % (95% CI)       |
| Hypertension at Visit 1 | 1938     | 153                    | 7.9 (6.8 to 9.2)  | 58                        | 3.0 (2.3 to 3.8) |
| Hypertension at Visit 2 | 1614     | 141                    | 8.7 (7.5 to 10.2) | 55                        | 3.4 (2.6 to 4.4) |
| Hypertension at both    | 1296     | 123                    | 9.5 (8.0 to 11.2) | 53                        | 4.1 (3.1 to 5.3) |
| Not confirmed           | 959      | 48                     | 5.0 (3.8 to 6.6)  | 7                         | 0.7 (0.0 to 1.5) |
| Normotensives           | 7769     | 438                    | 5.6 (5.1 to 6.2)  | 25                        | 0.3 (0.2 to 0.5) |
| All participants        | 10025    | 609                    | 6.1 (5.6 to 6.6)  | 85                        | 0.8 (0.7 to 1.0) |

**Table 5.**

CV risk distribution among the 9926 adult subjects investigated in the HYDY study based on the results first visit (visit 1), or both visits.

| Risk Categories | After Visit 1 |            |                            | After two visits |            |                            | $\Delta$<br>n= |
|-----------------|---------------|------------|----------------------------|------------------|------------|----------------------------|----------------|
|                 | n=            | Crude<br>% | Age weighted<br>% (95% CI) | n=               | Crude<br>% | Age weighted<br>% (95% CI) |                |
| Average risk    | 2246          | 22.6       | 30.3 (28.9 to 31.6)        | 2326             | 23.4       | 31.3 (29.9 to 32.7)        | 128851         |
| Low risk        | 3387          | 34.1       | 33.7 (32.4 to 35.0)        | 3495             | 35.2       | 34.1 (32.8 to 35.4)        | 48207          |
| Moderate risk   | 2234          | 22.5       | 20.3 (19.3 to 21.3)        | 2281             | 23.0       | 20.7 (19.7 to 21.7)        | 52613          |
| High risk       | 1206          | 12.1       | 8.2 (7.7 to 8.7)           | 1033             | 10.4       | 6.6 (6.1 to 7.1)           | -190741        |
| Very high risk  | 853           | 8.6        | 7.5 (6.9 to 8.1)           | 792              | 8.0        | 7.2 (6.6 to 7.8)           | -36523         |

$\Delta$  = estimated difference between Yemen subjects attributed to the risk category on the basis of BP measurements taken at the first visit and those attributed to the same class on the basis of average of BP measurements taken at both visits (subjects allocated at Visit 1 – subjects allocated after two visits).

## Legends to Figures

### Figure 1.

Diagnosis of hypertension (systolic blood pressure  $\geq 140$  mm Hg and/or diastolic blood pressure  $\geq 90$  mm Hg and/or self-reported use of antihypertensive drugs at the time of the interview) performed on the basis of measurements taken at the first visit (visit 1), at the second visit (visit 2), or both. The number of subjects with and without the condition and age-weighted rates (to the 15-69 years Yemen population) are reported.

### Figure 2.

Factors associated with the misclassification of hypertension diagnosis (systolic blood pressure  $\geq 140$  mm Hg and/or diastolic blood pressure  $\geq 90$  mm Hg at both visits) at multiple logistic regression analysis including only non-treated subjects (n=1396). Results are expressed as odd ratio (OR) with 95% CI.

### Figure 3.

Blood pressure and CV risk stratification of HYDY participants according to the ESH/ESC chart using average blood pressure values at visit1 and at both visits.



~~Impact of one or two visits strategy on hypertension burden estimation in Yemen population aged 15 to 69: a population based cross-sectional study.~~

Impact of one or two visits strategy on hypertension burden estimation in HYDY, a population based cross-sectional study: **implications for health care resource allocation decision making.**

Pietro Amedeo Modesti, Professor of Internal Medicine <sup>1,2,3</sup>, [pamodesti@unifi.it](mailto:pamodesti@unifi.it),

Stefano Rapi, Director of Chemical Laboratory <sup>2</sup>, [rapis@aou-careggi.toscana.it](mailto:rapis@aou-careggi.toscana.it),

Mohamed Bamoshmoosh, Professor of Medicine <sup>4</sup>, [bamoshmoosh@hotmail.it](mailto:bamoshmoosh@hotmail.it),

Marzia Baldereschi, Epidemiologist <sup>5</sup>, [baldereschi@in.cnr.it](mailto:baldereschi@in.cnr.it),

Luciano Massetti, Computer Science Engineer <sup>5</sup>, [l.massetti@ibimet.cnr.it](mailto:l.massetti@ibimet.cnr.it),

Gian Franco Gensini, Professor of Internal Medicine <sup>1,2,3</sup>, [gianfranco.gensini@unifi.it](mailto:gianfranco.gensini@unifi.it),

Dong Zhao, Professor of Epidemiology <sup>6</sup>, [deezhao@vip.sina.com](mailto:deezhao@vip.sina.com),

Dawood Al-Hidabi, Rector University <sup>4</sup>, [d.alhidabi@ust.edu.ye](mailto:d.alhidabi@ust.edu.ye),

Husni Al Goshae, Professor of Medicine <sup>4</sup>, [algoshae@gmail.com](mailto:algoshae@gmail.com),

<sup>1</sup> Department of Medical and Surgical Critical Care, University of Florence, viale Morgagni 85, 50134 Florence, Italy; <sup>2</sup> Azienda Ospedaliero Universitaria Careggi (AOUC), Largo Giovanni Alessandro Brambilla 3, 50134 Florence, Italy; <sup>3</sup> Fondazione Don Carlo Gnocchi, Centro di S.Maria degli Ulivi, 124, V. Impruneta 50023 Pozzolatico Florence, Italy; <sup>4</sup> University of Science and Technology, Science and Technology University Hospital, sixty St., P.O. Box 13061, Sana'a, Yemen; <sup>5</sup> Italian National Research Council, Via Madonna del Piano 10, 50019 Sesto Fiorentino, Florence, Italy; <sup>6</sup> Department of Epidemiology, Capital Medical University Affiliated Beijing Anzhen Hospital, Beijing Institute of Heart, Lung and Blood Vessel Diseases, No. 2 Anzhen Street, Chaoyang District, Beijing 100029, China.

**Correspondence to:** P A Modesti [pamodesti@unifi.it](mailto:pamodesti@unifi.it)

**Word count: 3876**

**Contributorship Statement:**

PAM, SR, MoB, and MaB drafted the manuscript. PAM, SR, MoB, MaB, LM, GFG, DAH, and HAG were involved in the conception and design of the study. DAH, and HAG were part of the project management team that coordinated data collection for the study. PAM, and MaB wrote the statistical analysis plan; PAM, SR, and LM conducted the main analyses and provided statistical advice; DZ provided substantial contributions to analysis and interpretation of data and revised the draft paper. All authors had access to all data sources, contributed to the interpretation of results, commented on the report, and approved the final version for publication. PAM is the guarantor.

## Summary

### 1. Article Focus

~~To investigate the effect on hypertension prevalence estimation and on CV risk stratification of taking blood pressure at one or two visits in a cross-sectional national survey.~~

To investigate the effects on health care resource allocation decision making of taking blood pressure at one or two visits with CV risk stratification.

To identify the characteristics of subjects who are excluded from the final diagnosis when restricting the diagnostic criteria.

### 2. Key Messages

The present study clarify that although there is a large discrepancy (35%) in the estimation of hypertension prevalence on the basis of one visit or two visits, only 1.9% of subjects classified at high or very high CV risk at visit 1 moved to average, low, or moderate CV risk categories after two visits.

Subjects excluded from the final diagnosis of hypertension, had rates of proteinuria and self-reported CV disease comparable with normotensive subjects and the general population.

According to present data the choice of one or two visits is not relevant when a strategy that allows for a more comprehensive framework of CV risk is implemented.

### 3. Strength and Limitations

This study utilised data from nationally representative survey conducted with a door to door approach and a high response level in a developing country.

Laboratory investigations were performed with the use of dry chemistry. However the long distance to get to a service laboratory requires shipments under special conditions, often resulting in deterioration and spoilage of the specimen.

## ABSTRACT

**Context.** The prevalence of hypertension in developing countries is coming closer to values found in developed countries. However, surveys usually rely on readings taken at a single visit, the option to implement the diagnosis on readings taken at multiple visits, being limited by costs.

**Objective.** ~~To investigate the impact of one or two visits strategy on hypertension burden estimation and CV risk stratification.~~ **To estimate more accurately the magnitude and extent of the resource that should be allocated to the prevention of hypertension.**

**Design.** Population-based cross-sectional survey with triplicate blood pressure readings taken on two separate home-visits.

**Setting.** Rural and urban locations in three areas of Yemen (capital, inland, and coast).

**Participants.** A nationally representative sample of the Yemen population aged 15 to 69 years (5063 men and 5179 women), with an overall response rate of 92% in urban and 94% in rural locations.

**Main outcome measure.** Hypertension diagnosed as systolic blood pressure  $\geq 140$  mmHg and/or diastolic blood pressure  $\geq 90$  mmHg and/or self-reported use of antihypertensive drugs.

**Results.** Hypertension prevalence (age-standardized to the WHO world population 2001) based on fulfilling the same criteria on both visits (11.3%; 95% CI 10.7-11.9), was 35% lower than estimation based on the first visit (17.3%; 16.5-18.0). Advanced age, blood glucose  $\geq 7$  mmol/L, or proteinuria  $\geq 1+$  at dipstick test at visit one, were significant predictors of confirmation at visit two. The 959 participants found to be hypertensive at visit one or at visit two only and thus excluded from the final diagnosis, had a rate of proteinuria (5.0%; 3.8-6.5) comparable to rates of the general population (6.1%; 5.6-6.6), and of subjects normotensive at both visits (5.6%; 5.1-6.2). Only 1.9% of Yemen population classified at high or very high CV risk at visit one moved to average, low, or moderate CV risk categories after two visits.

**Conclusions.** Hypertension prevalence based on readings obtained after two visits is 35% lower than estimation based on the first visit, subjects were excluded from final diagnosis belonging to low CV risk classes.

### Subject headings

hypertension (high blood pressure); hypertension diagnosis; cardiovascular disease risk factors; epidemiology; survey;

## INTRODUCTION

The World Health Organization has been indicating since 2001 that cardiovascular (CV) disease is the first cause of death worldwide (1). More precisely, 80% of CV death are now occurring in low- and middle-income countries (2, 3). Surveys performed in developing countries are revealing that changing lifestyle and urbanization are associated with a growing prevalence of hypertension (4) which is coming closer to values found in developed countries (5). All these surveys rely on readings taken at a single visit, the option to implement the diagnosis on readings taken at multiple visits, as recommended by guidelines for clinical practice (6,7), being limited due to costs. Diagnostic criteria based on readings collected at a single visit, might however lead to include subjects with high BP variability and episodic hypertension, with a final overestimation of ~~a true~~ hypertension prevalence (8,9). Although high BP variability potentially increases the risk of future CV events (10), treatment decision is uncertain. Conversely resource allocation in developing countries requires sound data. Finally, although the association between hypertension and target organ damage was recently reported to be independent by the diagnostic criteria (9), the CV risk characteristics of subjects which are impacted more from the two survey strategies, being either included among hypertensives after a single visit survey or excluded when restricting the diagnostic criteria, is currently unknown.

In the Hypertension and Diabetes in Yemen (HYDY) survey, subjects received urine dipstick test for proteinuria combined with triplicate blood pressure readings performed during two separate home-visits as recommended by guidelines for the clinical diagnosis of hypertension (6,7). **To estimate more accurately the magnitude and extent of the resource that should be allocated to the prevention of hypertension we** 1) ~~to compared the differences on~~ prevalence, awareness, treatment, and control rates, and ~~on~~ CV risk stratification when the definition of hypertension rely on data collected either at a single or at two visits carried out in different dates and 2) ~~to identify~~ **ied** the characteristics of subjects who are excluded from the final diagnosis when restricting the diagnostic criteria.

## METHODS

### Study Sites and Study Population

The Yemen population was estimated to be more than 21 million in 2007 (11). A multi-stage stratified sampling method was used. In the first stage, Yemen was stratified into three regions, the capital area, the inland, and the coastal area. In addition to the governorate of Sana'a, the governorate of Taizz in the inland, and the governorates of Al Hudaydah and Hadramaut on the coast were selected to be representative of the geographic, economic, and climatic characteristics of the country. In the second stage, rural and city regions were identified from each study area. In the third stage, districts were arbitrarily identified within each urban and rural region, boundaries being defined using local maps or in consultation with the local health workers. The total number of districts within each study area (20 in the capital area, 12 in the inland, and 8 in the coastal area) was proportional to the estimated population size of the area. In the final stage, due to the lack of a national population register, a cluster of 300 participants was made for each district, participants being equally-allocated by gender and age-group (6-14 years; 15-24; 25-34; 35-44; 45-54; 55-69) to a total of twelve strata. All male and female subjects aged 6 through 69 years who lived permanently in the study areas were eligible. Pregnant women were excluded. A common set of rules for making a cluster was followed. Briefly, a sampling frame was established following enumeration of houses counting from the centre to the suburbs of the district and the first house to be surveyed was chosen at random by choosing a number on the list and selecting the corresponding house. Investigators then continued to call at every second address, always turning left. A household was defined as a group of people who usually live under the same roof and share meals. If more than one household was present in the same dwelling one was randomly selected. All of the eligible subjects in the same household were invited to take part in study. One hundred and eighty-two subjects refused to participate, and 12257 were evaluated between February 2008 and March 2009. Results obtained in subjects aged  $\geq 15$  years (5063 men and 5179 women) are reported in the present study.

The study was approved by the Ethical Committee of the University of Science and Technology, Sana'a, Yemen (Ref. 1-2007). Districts Leaders and local Chiefs also consented to the survey. Informed consent was obtained from every participant before data collection. No incentives were offered to study participants. Participants with untreated conditions identified during the examination were referred to a primary health-care provider.

### Data collection

1  
2  
3 The survey was performed following the three different levels of the World Health Organization  
4 Stepwise Approach to Chronic Disease Risk Factor Surveillance (STEPS)(12), which included  
5 questionnaire, physical measurements, and biochemical measurements, using standardized methods.  
6  
7 The burden of hypertension in the population was assessed by taking triplicate BP measurements on  
8  
9 two visits, separated by few days. Data collection was conducted at home by centrally trained survey  
10  
11 teams composed by two investigators of the opposite gender.  
12  
13

14 Community sensitization activities preceded each survey round, including local council briefings  
15  
16 with the chiefs and elders of the villages. During the first visit (visit 1) the head of the household or  
17  
18 spouse and the participant were informed about the objectives, and procedural details of the survey.  
19  
20 Privacy of information was assured. After obtaining consent, study questionnaire was administered.  
21  
22 The study questionnaire included questions about demographics, lifestyle, and medical history (WHO  
23  
24 STEPS-Instrument v2.0)(12). Participants were asked if they had been advised to change their diet  
25  
26 (“special prescribed diet”), or to lose weight (“advice or treatment to lose weight”), or quit smoking  
27  
28 (“advice or treatment to stop smoking”), or do exercise (“advice to start or do more exercise”),  
29  
30 attributed to hypertension, by indication of a health professional. Close-ended questions were asked to  
31  
32 find out if they had been seen by a traditional healer over the last year or if they had been using herbal  
33  
34 or traditional remedies attributed to high blood pressure. “Known ischaemic heart disease” (IHD) was  
35  
36 defined as a person with history of heart attack requiring hospitalization, or a person with physician-  
37  
38 diagnosed IHD who was taking medication as confirmed by the survey team. “Known stroke” was  
39  
40 defined as a person with a history of abrupt-onset weakness or paralysis on one side of the body, with  
41  
42 or without a history of hospitalization, or a person with physician-diagnosed stroke and currently  
43  
44 experiencing weakness or paralysis on one side of the body.  
45  
46

47 The mid-arm circumference was measured to use the appropriate cuff size (small, medium, and  
48  
49 large for mid-arm circumferences of 17-22 cm, 22-32 cm, and 32-42 cm respectively). Three  
50  
51 measurements of BP and pulse rate were taken at 2-min intervals on the dominant arm after a rest of at  
52  
53 least 15 min, in the seated position (7). Readings were obtained using a clinically validated  
54  
55 semiautomatic sphygmomanometer (HEM 705 IT; Omron Matsusaka Co Ltd, Japan). The average of  
56  
57 the last two readings for systolic and diastolic BP were defined as SBP1 and DBP1 respectively.  
58  
59 Anthropometric measurements were taken on standing participants wearing light clothes and without  
60  
61 shoes using standard techniques (13). Body weight was measured to the nearest 0.1 Kg using a spring  
62  
63 balance and height to the nearest 0.5 cm using a stadiometer. Waist and hip circumference was  
64  
65 measured to the nearest 0.1 cm. Finger prick blood samples were then obtained from fasting (>8h)



1  
2  
3 subjects (aged  $\geq 15$  years) to measure glucose (Accutrend system, Roche Diagnostics, Mannheim,  
4 Germany), cholesterol, and triglycerides blood values (MultiCare-in, HPS, Italy) using dry chemistry.  
5 The subject was then asked to void. A midstream specimen of urine was collected and dipstick test  
6 (Auction sticks, A.Menarini Diagnostics, Italy) was immediately performed and read manually to  
7 semiquantitate the occult blood (trace, 1+ to 4+) and protein (trace, 1+ to 4+). A new appointment was  
8 taken for non-fasting participants and for subjects who were menstruating. All subjects were then  
9 visited again within the next ten days by the same survey team using the same measurement devices  
10 and procedures for the second session of BP (SBP2 and DBP2) and fasting glucose (FG2)  
11 measurements.  
12  
13  
14  
15  
16  
17  
18  
19  
20

### 21 **Diagnostic criteria**

22 Arterial hypertension was defined as 1) systolic BP  $\geq 140$  mmHg and/or diastolic BP  $\geq 90$  mmHg  
23 and/or 2) self-reported use of antihypertensive drugs at the time of the interview (7). More precisely the  
24 prevalence of hypertension was based on values measured at the first visit (SBP1 and DBP1), at the  
25 second visit (SBP2 and DBP2), and on fulfilling the same criteria for hypertension on both visits.  
26 Awareness of hypertension was defined as self-report of any prior diagnosis of hypertension by a  
27 health care professional among the population defined as having hypertension. Hypertension treatment  
28 was defined as a self-reported use of antihypertensive drugs within the two weeks preceding the  
29 interview. Hypertension control was defined as systolic BP  $< 140$  mm Hg and diastolic BP  $< 90$  mm Hg.  
30 The proportion of hypertension control was relative to hypertensive treated with drugs.  
31  
32  
33  
34  
35  
36  
37  
38

39 Diabetes mellitus (DM) was defined as 1) fasting glucose (FG)  $\geq 7.0$  mmol/L at the two visits or  
40 2) self-reported use of hypoglycaemic medications at the time of the interview; impaired fasting  
41 glucose (IFG) as FG  $\geq 5.6$  mmol/L and  $< 7.0$  mmol/L in the absence of hypoglycaemic medications;  
42 normal FG as FG  $< 5.6$  mmol/L at the two visits (14). Overweight and obesity were defined as a body  
43 mass index (BMI) 25.0 to 29.9 kg/m<sup>2</sup>, and  $\geq 30$  kg/m<sup>2</sup> respectively. Abdominal obesity was defined as  
44 waist circumference  $> 102$  cm in men or  $> 88$  cm in women. Gender specific tertiles for BMI and waist-  
45 to-hip (W/H) ratio, were calculated using data of adult subjects without hypertension, normal FG,  
46 cholesterol  $< 5.0$  mmol/L, triglycerides  $< 1.7$  mmol/L, and no protein at urine dipstick test. Resulting  
47 cut-offs were 20.0 and 23.2 kg/m<sup>2</sup> for men and 20.5 and 24.3 kg/m<sup>2</sup> for women for BMI and 0.849 and  
48 0.907 in men and 0.815 and 0.887 in women for W/H ratio. On the basis of cholesterol and  
49 triglycerides assessments subjects were classified as high cholesterol ( $> 5.0$  mmol/l) or high  
50 triglycerides ( $> 1.7$  mmol/l) (7). Results of dipstick urinalysis were classified as no protein (0), protein  
51  
52  
53  
54  
55  
56  
57  
58  
59  
60



1  
2  
3 trace (+/-), or proteinuria ( $\geq+1$ ). A smoker was defined as one who smoked any form of tobacco on a  
4 daily (daily smoker) or a non-daily (occasional smoker) basis. Those who had smoked but had quit  
5 were designated as former smokers, and those who had never smoked at all were designated as never  
6 smokers. On the basis of education level subjects were classified into six levels: 1) illiterate; 2) can  
7 read and write; 3) primary school; 4) preparatory school; 5) secondary; 6) university or post. Fruit and  
8 vegetable consumption were classified as 1)  $\leq 1$  day/week; 2) 2-4 day/week; 3)  $\geq 5$  days/week.

9  
10  
11  
12  
13  
14 ~~Participants were categorized as sedentary if they walked or cycled for less than 10 min daily, if~~  
15 ~~their work did not involve intense physical activity, and they did not usually practice any sport or~~  
16 ~~recreational physical activities.~~

17  
18  
19  
20 Participants were categorized as: sedentary if they walked or cycled for less than 10 min daily, if  
21 their work did not involve intense physical activity, and they did not usually practice any sport or  
22 recreational physical activities; engaging in light to moderate physical activity if they performed work  
23 or recreational physical activities one or two days/week; engaging in vigorous physical activity if they  
24 performed work or recreational vigorous physical activities three days or more/week.

25  
26  
27  
28 According to the ESH/ESC chart (7) risk stratification (average, low, moderate, high, and very  
29 high added risk categories) was based on the presence of risk factors (average of SBP1/SBP2 and  
30 DBP1/DBP2 graded in five categories; age  $>55$  years for men or  $>65$  years for women; daily smoking;  
31 waist circumference  $>102$  cm in men or  $>88$  cm in women; IFG; triglycerides  $>1.7$  mmol/L; total  
32 cholesterol  $>5.0$  mmol/L), DM, subclinical organ damage (protein trace at dipstick test), and  
33 established renal (proteinuria  $\geq 1+$  at dipstick test) or CV disease (self-reported stroke, myocardial  
34 infarction or peripheral artery disease). The cluster of three out of 4 risk factors among abdominal  
35 obesity, altered fasting plasma glucose, BP  $>130/85$  mmHg, and high triglycerides (as defined above),  
36 was considered as the presence of metabolic syndrome.

37  
38  
39  
40  
41  
42  
43  
44 Measures have been taken to attain complete reliability and to reduce variation to reasonable  
45 limits. All study personnel successfully completed the specific one-week training programme organized  
46 in Sana'a (December 2007) on the aims of the study and the specific methods used to standardize the  
47 procedure for sampling and contacting individuals, questionnaire administration and form filling, BP  
48 measurements using electronic devices, performing blood biochemical assay, performing urine assay,  
49 and data entry into computerized data base. The training program included a pilot testing performed on  
50 a population sample of 400 individuals in urban and rural areas of Sana'a.

## 51 52 53 54 55 56 57 58 **Statistical methods**

1  
2  
3 A sample size of at least 1,117 subjects was required to achieve a 1% precision around an  
4 estimated prevalence of diabetes of 3% with 95% confidence level (CI). Estimated required sample size  
5 for two-sample comparison of diabetes prevalence of 2.25% vs 3.75% with the assumption of 0.05  
6 alpha (two-sided), 80% power, was 2,161 subjects for each group. Cleaning the data, handling missing  
7 data, and outliers were done according to the guidelines of WHO for STEPS data management (12).  
8 Prevalence estimates were calculated for the five age groups in the overall population and by gender.  
9 Data are expressed as mean±SD with 95% CI for continuous variables, and as rates with 95% CI for  
10 categorical variables. Prevalence was also weighted to represent the total Yemen population aged 15-69  
11 years (2008 estimated Yemen population) (11,16), and age-standardized for age ranges 15-69 years  
12 using WHO World Standard Population (17). For hypertension awareness, and treatment the analysis  
13 was done on the subpopulation of hypertensive patients; for hypertension control, analysis was done on  
14 the subpopulation of treated people. As there were no national data available for these two  
15 subpopulations for the purpose of weighting, at this stage of analysis, we did not weight the data.  
16 Prevalence rates were compared using  $\chi^2$  analysis and Risk Ratio (RR) (16). When appropriate, test of  
17 hypothesis was done at significance level 0.05 two sided. Associations between socio-demographic,  
18 anthropometric, and clinical factors and the prevalence of hypertension were explored with logistic  
19 regression analysis, the diagnosis of hypertension being entered as dependent dichotomic variable.  
20 Results of regression analysis are expressed as RR with 95% CI for each independent variable (20). All  
21 analyses were performed with SPSS software, version 17.0 (SPSS).  
22  
23  
24  
25  
26  
27  
28  
29  
30  
31  
32  
33  
34  
35  
36  
37  
38  
39  
40  
41  
42  
43  
44  
45  
46  
47  
48  
49  
50  
51  
52  
53  
54  
55  
56  
57  
58  
59  
60

## RESULTS

### Characteristics of study population

Characteristics of HYDY participants are reported in Table 1. Distribution among age decades and living location (urban, rural) were identical among men and women. Overall, the prevalence of illiterate subjects was higher in women (51%) than in men (19%). The prevalence of obesity and abdominal obesity were also higher in women (13.4%; 95%CI 12.5 to 14.4; and 26.5%; 25.3 to 27.7) than in men (6.9%; 6.2 to 7.6; and 3.4%; 2.9 to 3.9).

All subjects received two visits at home separated by a median interval of 5.36 days (95% CI 5.30 to 5.42; range 1 to 13 days), with no differences between gender. The average of the last two of the three BP and heart rate readings taken at each visit is reported in Table 1. Values measured at visit 2 were lower than values obtained at visit 1 both in men and in women.

### Hypertension rate and diagnostic criteria

Overall the rate of hypertension at visit 1 was 19.1% (95% CI 18.3-19.8), being 15.9% (15.2-16.6) at visit 2. In particular 1307 and 7930 participants were found to be hypertensive and normotensive at both visits respectively; 642 subjects had an hypertension diagnosis at visit 1 only, whereas 317 were hypertensive at visit 2 only (chi-squared test  $P < 0.001$ ). Therefore when the diagnosis was based on fulfilling the same criteria on both visits the estimated hypertension rate was lowered by 33% (12.8%; 12.1-13.4). When data were standardized to the Yemen population (15-69 years) prevalence was 7.7% (95% CI 7.2 to 8.1). This value, considering both the two visits, is lower than estimations obtained when visit 1 (12.8%; 95% CI: 12.2 to 13.4), or visit 2 (10.5%; 95% CI: 9.9 to 11.0) are considered independently (Figure 1). Hypertension prevalence age-standardized to the WHO world population 2001 aged 15-69 years was 11.3% (10.7 to 11.9) when based on both visits and 17.3% (16.5 to 10.0) when based on the first visit (gender specific values are reported in Table 2).

Overall 528 subjects were on antihypertensive treatment. Rates of awareness and treatment importantly varied according to the criteria adopted for hypertension diagnosis being higher when based on the results of both visits. The estimation of control rates was more restrictive when based on the result of both visits than of single visits (Table 2). In both genders the proportion of hypertensive subjects aware of their hypertension, the proportion of subjects under current treatment increased with age. Conversely, as expected, the proportion of treated subjects whose hypertension was controlled decreased with age (Table 2). When excluding individuals already on antihypertensive drug treatment

1  
2  
3 and estimating hypertension prevalence on BP measurements, the rate of hypertension among  
4 participants was 17.2% (16.4-18.0) at visit 1 (n=1425), 12.8% (12.1-13.5) at visit 2 (n=1098), 8.7%  
5 (8.1-9.3) of subjects (n=779) fulfilling the criteria at both visits.  
6  
7  
8  
9

### 10 **Factors affecting misclassification of hypertension at visit one**

11 When considering untreated subjects, 53% out of the 1094 participants who had hypertension  
12 Grade 1 at the first visit, and 24% out of the 239 subjects with hypertension Grade 2, did not fulfil the  
13 criteria for hypertension at visit 2 reassessment. Conversely only 8% out of the 92 untreated  
14 participants with Grade 3 hypertension had normal BP values at visit 2 reassessment. Misclassification  
15 also varied by subject age. The younger the subjects were, the wider the difference was between  
16 estimates based on one or two visits (Table 2). As a result only 43% of men, and 44% of women <35  
17 years of age found to be hypertensive at visit one were hypertensive at both visits. These percentages  
18 were 72% and 76% for men and women aged >45 years of age (Table 3).  
19  
20  
21  
22  
23  
24  
25

26 When characteristics of misclassified participants were compared to untreated subjects with  
27 hypertension diagnosis confirmed at both visits (logistic regression analysis including 1396 subjects),  
28 misclassification was found to be independent by gender, education level, BMI and W/H ratio tertiles.  
29 The probability to have the diagnosis confirmed was directly associated with age decades, grade of  
30 hypertension, provisional diagnosis of diabetes at visit 1 (FG  $\geq$ 7.0 mmol/L or self-reported use of  
31 hypoglycaemic medications), and proteinuria  $\geq$ 1+ at dipstick test.  
32  
33  
34  
35  
36

37 Rates of proteinuria ( $\geq$ 1+ at dipstick test), or the self-report of CV disease (MI,stroke,POAD) at  
38 questionnaire, were comparable among subjects classified as hypertensive at the first, the second, or at  
39 both visits (Table 3). However, the 959 participants found to be hypertensive at visit 1 or at visit 2 only  
40 and thus excluded from the final diagnosis of hypertension (not confirmed), had rates of proteinuria and  
41 self-reported CV disease comparable with normotensive subjects (at both visits) and the general  
42 population (Table 4).  
43  
44  
45  
46  
47  
48

### 49 **Cardiovascular risk stratification after one or two visits**

50 BP readings taken at the first visit (SBP1/DBP1) or average of BP readings taken at the first and  
51 the second visits (SBP1-SBP2/DBP1-DBP2) were used to stratify HYDY participants in the five BP  
52 categories according to ESH/ESC guidelines (7). As indicated by Figure 2 the different prevalence of  
53 hypertension when the diagnosis rely on measurements taken at the first visit or at two visits is mainly  
54 due to misclassification of subjects with Grade 1 hypertension.  
55  
56  
57  
58  
59  
60

1  
2  
3 CV risk stratification according to the ESH/ESC chart (7) using average BP values at visit1 and  
4 at both visits is reported in Table 5. Most people had average or low 10-year CV risk, and a large  
5 fraction (84.3% after visit 1 and 86.2% after two visits) had CV risk <20% (average, low, or moderate).  
6  
7 The age weighted percentage of the population with a CV risk  $\geq 20\%$  (high, or very high CV risk) was  
8  
9 13.8% after visit 1 and 12.0% after two visits (Table 5). Overall, only 1.9% of Yemen population  
10  
11 classified at high or very high CV risk at visit 1 moved to average, low, or moderate CV risk categories  
12  
13 after two visits (Figure 3).  
14  
15  
16  
17  
18  
19  
20  
21  
22  
23  
24  
25  
26  
27  
28  
29  
30  
31  
32  
33  
34  
35  
36  
37  
38  
39  
40  
41  
42  
43  
44  
45  
46  
47  
48  
49  
50  
51  
52  
53  
54  
55  
56  
57  
58  
59  
60

## DISCUSSION

This study provides helpful results to clarify the impact of survey strategy on the final estimation of hypertension burden in developing countries. One of the major contribution is the information that a strategy based on two visits allows to exclude from final diagnosis subjects at low CV risk with a resultant 35% reduction of the estimated prevalence of hypertension. This information is essential for estimating drug costs and budget allocation in national prevention programs.

The fall in BP over repeated readings mainly rely to a transient elevation of BP in persons submitted to BP measurements, and was reported to be inversely related with age and directly related to BP values (8). From a clinical prospective, the uncertainty about the patient's true BP at clinic measurement may cause uncertainty in treatment decisions (18). Therefore, guidelines for clinical practice commonly recommend that the diagnosis of hypertension rely on multiple measurements obtained at different visits (6,7). At population level, the relevant logistic difficulties and personnel costs of a strategy based on two separate visits, and the negative prognostic role of high BP variability and episodic hypertension (10), may sometimes lead to accept the adoption of a single visit strategy. Ignoring the difference in hypertension definition criteria may however lead to erroneous conclusions when comparing results of surveys assessing the prevalence of hypertension, awareness, and control in different countries (19). In two epidemiological studies where the estimation of hypertension prevalence based on two visits was compared with the estimation based on a single visit, the reduction was 12% in a cohort of subjects aged  $62\pm 11$  years (9), being  $>35\%$  in a cohort of subjects aged  $39\pm 9$  years (20). In particular, two thirds of men  $<30$  years of age had normal BP values at the second visit (20). In both studies, the majority of subjects misclassified as hypertensive were in the less severe hypertensive grade (9,20). In a recent small surveys the estimation of hypertension prevalence had, as expected, a strong association with the presence of left ventricular hypertrophy independently from diagnostic criteria (one or two visits) (9). However, the most critical issue, the CV risk of subjects excluded from final diagnosis, is still poorly investigated. This information is especially crucial in low resource setting where budget allocation to CV prevention programs might compete with other priorities. HYDY study participants were stratified by cardiovascular risk according to ESH/ESC criteria (7) thus allowing to investigate characteristics of misclassified subjects. Subjects misclassified at first visit most frequently belonged to low or moderate CV risk categories, having a rate of proteinuria comparable to the general population and to subjects found to be normotensive at both visits. **This does not necessarily imply that subjects with high blood pressure at both visits are "real" hypertensives but that they are higher risk hypertensives.** Therefore when resources are limited the

1  
2  
3 estimation of hypertension prevalence might be based on only one visit, while resources can be more  
4 efficiently used to target high-risk people who will benefit the most.  
5

6  
7 Heart attack and stroke are preventable either through conventional management of single risk  
8 factors (hypertension), or by applying a total CV risk approach which could permit providers to  
9 focalize drug treatment use only in high risk subjects. CV risk has a continuous relationship with BP  
10 values. In particular, the present study clarify that although there is a large discrepancy (35%) in the  
11 estimation of hypertension prevalence on the basis of one visit or two visits, only 1.9% of the Yemen  
12 population classified at high or very high CV risk at visit 1 moved to average, low, or moderate CV  
13 risk categories after two visits. Current treatment strategies are indeed based on CV risk stratification.  
14 It is recommended that pharmacologic treatment should be provided for all people when their  
15 calculated 10-year CV risk is at least 30% or more. The risk threshold can be lowered to 20% if and  
16 when resources permit. More precisely, age weighted prevalence of subjects at very high CV risk  
17 estimated after one visit did not differ vs the estimation based on the two visits strategy. A mild  
18 difference is appreciable only when the 20% threshold is adopted, corresponding to an estimated  
19 number of 227,000 Yemen patients aged 15-69 years.  
20

21  
22 The age-standardized prevalence of hypertension at first visit for subjects aged 15-69 years  
23 (16.2%) is markedly lower than rates reported in economically developed countries for subjects older  
24 than 20 years (37.3%) (2). Most importantly, direct age standardization to the 35-69 years WHO World  
25 Standard Population (17) (26.6%; 25.5 to 27.6), allows comparison with Egypt (33.8%) (21), Iran  
26 (34.1%) (22), or Turkey (34.2%) (23). The low prevalence of hypertension, besides any methodological  
27 consideration, might thus be related to the possibility that Yemen is behind in the epidemiological  
28 transition currently ongoing in other countries of the Middle East Crescent area.  
29

30  
31 In conclusion, according to present data, the choice of one or two visits strategy is not relevant,  
32 but it is important to implement a strategy that allows for a more comprehensive framework of CV risk.  
33  
34  
35  
36  
37  
38  
39  
40  
41  
42  
43  
44  
45  
46  
47  
48  
49  
50  
51  
52  
53  
54  
55  
56  
57  
58  
59  
60



## HYDY Study Group

Steering Committee: Pietro Amedeo Modesti (Chair), Husni Al Goshae, Mohamed

Bamoshmoosh, Dawood Al-Hidabi, Gian Franco Gensini, Marzia Baldereschi, Stefano Rapi, Luciano Massetti. Monitoring Board: Mohamed Shamsuddin, Hameed M.Akhan, Mahdy Al-Karewany, Abdul-Malik Al-Amrany, Ferdaws Al-Jilani; Data Center: Ammar Al-Ghadi, Giulia Elisa Cambi, Antonella Ferrari.

## Acknowledgments

We thank the many enthusiastic workers in Yemen who have contributed to the study: *Capital area*: Hisham Abdulrab Ali Al Qubati, Raed Faisal Nasser, Aziz Hussain Ali Moshoe, Mohammed Abdulah Ashmeni, Abdulhamed Hulfy Alanashany, Mohammed Ibrahim Ahmed Al Hamali, Naif Radman Hamdan Agial, Sami Abduh Kaid Ahmed Alwessaby, Munera Abduwhab Saleh Yahya, Hyam Abdul Kareem Al Hyfi, Ziad Abdullah Mohammed Al Mass, Liza Nayib Shamiri, Sahar Ahmed Abdullah Moqbel, Abdullah Assan Mohammed Guly, Abdulaziz Saeed Salem Bawazir, Abi Saleh Al Rawi, Kaled Sadeg Ali Al-Shaibari, Abdul Bari Mahfoudh Omar Al Daba, Osama Hadi Abdu Haig, Gamil Al Hamdi Abdo Mohsan; *Inland area*: Khalil Abdulwahid Ali Al-Kuhlani, Fahd Ahmed Ahmed Ali Al Durafi, Moad Ahmed Abdul Al Kareem Al Shorihy, Ashra F Saheed Abdalh, Omar Ahmed Abdul Aziz, Kalil Abdu Mohammed Assufi, Ahmed Saeed Ahmed Al Terin, Mamon Ahdo Alrahmen Alp, Fuad Mohammed Ali Abdu Ghaleb, Mohammed Ali Hussien, Mobark Mohammad Dabwan Quasem, Awad Hamad Mohammad; *Coastal area*: Yasin Mohammad Al Hay Ibrahim, Abdu Al Aleem Qaid Abdu Al Aleem Safian, Mohammed Ali Mohammed Salman, Abdh Kozim Abdullah Al Nhozy, Mohammed Awad Omer Hydhi, Hussein Omar Al Ahbari, Adel Hai Bin Obedellah, Khalid Hussan Khaleby. We would also like to thank the chiefs and elders of the villages for their help and Margaret O'Neill for her editorial assistance.

## Disclosures

All authors have completed the Unified Competing Interest form at [www.icmje.org/coi\\_disclosure.pdf](http://www.icmje.org/coi_disclosure.pdf) (available on request from the corresponding author) and declare: no support from any organisation for the submitted work; no financial relationships with any organisations that might have an interest in the submitted work in the previous 3 years; no other relationships or activities that could appear to have influenced the submitted work.

## Details of contributors

PAM, SR, MoB, and MaB drafted the manuscript. PAM, SR, MoB, MaB, LM, GFG, DAH, and HAG were involved in the conception and design of the study. DAH, and HAG were part of the project



1  
2  
3 management team that coordinated data collection for the study. PAM, and MaB wrote the statistical  
4 analysis plan; PAM, SR, and LM conducted the main analyses and provided statistical advice; DZ  
5 revised the draft paper. All authors had access to all data sources, contributed to the interpretation of  
6 results, commented on the report, and approved the final version for publication. PAM is the guarantor.  
7  
8  
9

### 10 **Details of all sources of funding for the study**

11  
12 HYDY project is part of the Executive Programme of Scientific and Technological Cooperation  
13 between Italy and Yemen for the years 2006-09. This work was supported by a grant from the  
14 Ministero dell'Università e della Ricerca (Direzione Generale per le strategie e lo sviluppo  
15 dell'internazionalizzazione della ricerca scientifica e tecnologica), Rome, Italy and Menarini  
16 International Operations Luxembourg SA.  
17  
18  
19

20  
21 All researchers were independent from funders.

22  
23 Funders, had no role in study design; in the collection, analysis, and interpretation of data; in the  
24 writing of the report; and in the decision to submit the article for publication.  
25

### 26 **Statements**

27  
28 The Corresponding Author has the right to grant on behalf of all authors and does grant on behalf  
29 of all authors, a worldwide licence to the Publishers and its licensees in perpetuity, in all forms, formats  
30 and media (whether known now or created in the future), to i) publish, reproduce, distribute, display  
31 and store the Contribution, ii) translate the Contribution into other languages, create adaptations,  
32 reprints, include within collections and create summaries, extracts and/or, abstracts of the Contribution,  
33 iii) create any other derivative work(s) based on the Contribution, iv) to exploit all subsidiary rights in  
34 the Contribution, v) the inclusion of electronic links from the Contribution to third party material  
35 where-ever it may be located; and, vi) licence any third party to do any or all of the above.  
36  
37  
38  
39  
40  
41

42 All authors, external and internal, had full access to all of the data (including statistical reports  
43 and tables) in the study and can take responsibility for the integrity of the data and the accuracy of the  
44 data analysis.  
45  
46

### 47 **Data sharing**

48  
49 There is no additional data available.  
50  
51  
52  
53  
54  
55  
56  
57  
58  
59  
60

**REFERENCES**

1. Rodgers A, Vaughan P. World Health Report 2002: Reducing Risks, Promoting Healthy Life. Geneva, Switzerland: World Health Organization; 2002. Available at URL: <http://www.who.int/whr/2002/en/> Accessed January 26, 2012.
2. Kearney PM, Whelton M, Reynolds K, et al. Global burden of hypertension: analysis of worldwide data. *Lancet*. 2005;365:217-23.
3. Yusuf S, Reddy S, Ounpuu S, et al. Global burden of cardiovascular diseases: part I: general considerations, the epidemiologic transition, risk factors, and impact of urbanization. *Circulation*. 2001;104:2746-53.
4. Global health risks: mortality and burden of disease attributable to selected major risks. WHO, Geneva, 2009: [http://www.who.int/healthinfo/global\\_burden\\_disease/global\\_health\\_risks/en/index.html](http://www.who.int/healthinfo/global_burden_disease/global_health_risks/en/index.html). Accessed January 26, 2012.
5. Pereira M, Lunet N, Azevedo A, Barros H; Differences in prevalence, awareness, treatment and control of hypertension between developing and developed countries. *J Hypertens* 2009;27:963-75.
6. 1999 World Health Organization-International Society of Hypertension Guidelines for the Management of Hypertension. Guidelines Subcommittee. *J Hypertens*. 1999;17:151-83.
7. Mancia G, De Backer G, Dominiczak A, et al.; Management of Arterial Hypertension of the European Society of Hypertension; European Society of Cardiology. 2007 Guidelines for the Management of Arterial Hypertension: The Task Force for the Management of Arterial Hypertension of the European Society of Hypertension (ESH) and of the European Society of Cardiology (ESC). *J Hypertens*. 2007;25:1105-87.
8. Bovet P, Gervasoni JP, Ross AG, et al: Assessing the prevalence of hypertension in populations: are we doing it right? *J Hypertens*. 2003;21:509-17.
9. Figueiredo D, Azevedo A, Pereira M, et al. Definition of hypertension: the impact of number of visits for blood pressure measurement. *Rev Port Cardiol* 2009; 28: 775-83
10. Rothwell PM, Howard SC, Dolan E, et al: Prognostic significance of visit-to-visit variability, maximum systolic blood pressure, and episodic hypertension. *Lancet*. 2010; 375: 895-905.
11. U.S. Census Bureau. International Data Base (IDB). Midyear Population by Age and Sex: Yemen: 2008. <http://www.census.gov/population/international/data/idb/country.php>. Accessed January 26, 2012.
12. WHO STEP programme. <http://www.who.int/chp/steps/en/>. Accessed January 26, 2012.

- 1  
2  
3 13.Tolonen H,Kuulasmaa K,Laatikainen T, et al. Recommendation for indicators,international  
4 collaboration,protocol and manual of operations for chronic disease risk factor surveys.(2002).  
5 <http://www.ktl.fi/publications/ehrm/product2/title.htm>. Accessed January 26, 2012.  
6  
7
- 8 14.American Diabetes Association.Diagnosis and Classification of Diabetes Mellitus.*Diabetes Care*  
9 2008;31:S55-S60.  
10
- 11 15.Executive summary of the third report of the National Cholesterol Education Program (NCEP)  
12 expert panel on detection,evaluation,and treatment of high blood cholesterol in adults (Adult  
13 Treatment Panel III).*JAMA* 2001;285:2486–97.  
14
- 15 16.Rothman KJ,Greenland S,Lash TL. Modern Epidemiology 3rd Ed.Philadelphia: Lippincott Williams  
16 & Wilkins,2008.  
17
- 18 17.Ahmad O,Boschi-Pinto C,Lopez AD, et al. Age standardization of rates: a new WHO standard.GPE  
19 Discussion Paper Series: No.31,World Health Organization,2001.  
20  
21 <http://www.who.int/healthinfo/paper31.pdf>. Accessed January 26, 2012.  
22  
23
- 24 18.Kerr EA, Zikmund-Fisher BJ, Klamerus ML, et al. The role of clinical uncertainty in treatment  
25 decisions for diabetic patients with uncontrolled blood pressure. *Ann Intern Med.* 2008;148:717-  
26 27.  
27
- 28 19.Birkett NJ. The effect of alternative criteria for hypertension on estimates of prevalence and control.  
29 *J Hypertens.* 1997;15:237-44.  
30
- 31 20.Lang T, de Gaudemaris R, Chatellier G, et al. Epidemiology Group of the Société Française  
32 d'Hypertension Artérielle and the IHPAF Working Physicians Group. Prevalence and therapeutic  
33 control of hypertension in 30,000 subjects in the workplace. *Hypertension.* 2001;38:449-54.  
34
- 35 21. Ibrahim MM, Rizk H, Appel LJ, et al. Hypertension prevalence, awareness, treatment, and control  
36 in Egypt. Results from the Egyptian National Hypertension Project (NHP). NHP Investigative  
37 Team. *Hypertension* 1995; 26: 886-90.  
38
- 39 22. Ebrahimi M, Mansournia MA, Haghdoost AA, et al. Social disparities in prevalence, treatment and  
40 control of hypertension in Iran: second National Surveillance of Risk Factors of  
41 Noncommunicable Diseases,2006. *J Hypertens* 2010; 28: 1620-9.  
42
- 43 23. Sönmez HM, Başak O, Camci C, et al. The epidemiology of elevated blood pressure as an estimate  
44 for hypertension in Aydin, Turkey. *J Hum Hypertens* 1999; 13: 399-404.  
45  
46  
47  
48  
49  
50  
51  
52  
53  
54  
55  
56  
57  
58  
59  
60

1  
2  
3  
4  
5  
6  
7  
8  
9  
10  
11  
12  
13  
14  
15  
16  
17  
18  
19  
20  
21  
22  
23  
24  
25  
26  
27  
28  
29  
30  
31  
32  
33  
34  
35  
36  
37  
38  
39  
40  
41  
42  
43  
44  
45  
46  
47  
48  
49  
50  
51  
52  
53  
54  
55  
56  
57  
58  
59  
60

For peer review only

**Table 1.** Characteristics of HYDY study participants.

|                                                   | Men                 | Women               |
|---------------------------------------------------|---------------------|---------------------|
| Participants, n                                   | 5063                | 5179                |
| Living in urban location, n (%)                   | 2519 (49.8)         | 2590 (50.0)         |
| Age (years), mean (95% CI)                        | 39.4 (39.0 to 39.9) | 39.2 (38.7 to 39.6) |
| 15–24 years, n (%)                                | 1016 (20.1)         | 1058 (20.4)         |
| 25–34 years, n (%)                                | 1020 (20.1)         | 1047 (20.2)         |
| 35–44 years, n (%)                                | 1008 (19.9)         | 1021 (19.7)         |
| 45–54 years, n (%)                                | 990 (19.6)          | 1057 (20.4)         |
| 55–69 years, n (%)                                | 1029 (20.3)         | 996 (19.2)          |
| Smokers (daily), n (%)                            | 1428 (28.2)         | 458 (8.8)           |
| Education (years), mean (95% CI)                  | 7.7 (7.5 to 7.9)    | 4.4 (4.2 to 4.5)    |
| Illiterate, n (%)                                 | 986 (19.5)          | 2666 (51.5)         |
| Can read and write, n (%)                         | 830 (16.4)          | 375 (7.2)           |
| Primary school, n (%)                             | 685 (13.5)          | 661 (12.8)          |
| Secondary school, n (%)                           | 832 (16.4)          | 542 (10.5)          |
| High school, n (%)                                | 774 (15.3)          | 504 (9.7)           |
| College or post, n (%)                            | 950 (18.8)          | 428 (8.3)           |
| <b>Self-reported physical activity, n (%)</b>     |                     |                     |
| Sedentary                                         | 914 (21.1)          | 1465 (32.8)         |
| Light to moderate                                 | 2606 (60.1)         | 2586 (57.9)         |
| Vigorous                                          | 814 (18.8)          | 418 (9.4)           |
| <b>Self-reported fruit consumption, n (%)</b>     |                     |                     |
| ≤1 day/week                                       | 2357 (46.7)         | 2470 (47.8)         |
| 2-4 day/week                                      | 1947 (38.6)         | 1962 (37.9)         |
| ≥5 days/week                                      | 744 (14.7)          | 740 (14.3)          |
| <b>Self-reported vegetable consumption, n (%)</b> |                     |                     |
| ≤1 day/week                                       | 1101 (21.8)         | 1040 (20.1)         |
| 2-4 day/week                                      | 1362 (26.9)         | 1437 (27.8)         |

|                                                  |                    |                        |                        |
|--------------------------------------------------|--------------------|------------------------|------------------------|
|                                                  | $\geq 5$ days/week | 2597 (51.3)            | 2692 (52.1)            |
| Treated with antihypertensive drugs, n           |                    | 215                    | 313                    |
| Height (cm), mean (95% CI)                       |                    | 161.6 (161.4 to 161.8) | 153.1 (152.9 to 153.3) |
| Weight (kg), mean (95% CI)                       |                    | 60.5 (60.1 to 60.9)    | 56.9 (56.5 to 57.3)    |
| Waist circumference (cm), mean (95% CI)          |                    | 78.5 (78.1 to 78.9)    | 80.0 (79.6 to 80.4)    |
| Abdominal obesity, n (%)                         |                    | 171 (3.4)              | 1372 (26.5)            |
| BMI (kg/m <sup>2</sup> ), mean (95% CI)          |                    | 23.1 (22.9 to 23.3)    | 24.3 (24.1 to 24.5)    |
| Overweight (25.0-29.9 kg/m <sup>2</sup> ), n (%) |                    | 1174 (23.2)            | 1321 (25.5)            |
| Obesity ( $\geq 30.0$ kg/m <sup>2</sup> ), n (%) |                    | 349 (6.9)              | 695 (13.4)             |
| High cholesterol ( $\geq 5$ mmol/L), n (%)       |                    | 593 (11.7)             | 803 (15.5)             |
| High triglycerides ( $\geq 1.7$ mmol/L), n (%)   |                    | 2007 (39.6)            | 1887 (36.4)            |
| Diabetes                                         |                    | 257 (5.1)              | 281 (5.4)              |
| Interval between visits (days), mean (95% CI)    |                    | 5.2 (5.2 to 5.3)       | 5.5 (5.4 to 5.6)       |
| First visit (mean, 95% CI)                       |                    |                        |                        |
| Systolic BP (mmHg)                               |                    | 123.0 (122.6 to 123.4) | 122.7 (122.1 to 123.3) |
| Diastolic BP (mmHg)                              |                    | 76.9 (76.5 to 77.3)    | 76.9 (76.7 to 77.1)    |
| Heart rate (mmHg)                                |                    | 79.3 (79.1 to 79.5)    | 82.2 (82.0 to 82.4)    |
| Air temperature (°C)                             |                    | 24.4 (24.2 to 24.6)    | 24.3 (24.1 to 24.5)    |
| Second visit (mean, 95% CI)                      |                    |                        |                        |
| Systolic BP (mmHg)                               |                    | 121.5 (121.1 to 121.9) | 120.6 (120.2 to 121.0) |
| Diastolic BP (mmHg)                              |                    | 76.2 (76.0 to 76.4)    | 76.0 (75.8 to 76.2)    |
| Heart rate (mmHg)                                |                    | 78.5 (78.3 to 78.7)    | 81.1 (80.9 to 81.3)    |
| Air temperature (°C)                             |                    | 24.4 (24.2 to 24.6)    | 24.2 (24.0 to 24.4)    |
| Dipstick test $\geq 1+$ , n (%)                  |                    | 339 (6.7)              | 270 (5.2)              |
| Self report of MI, Stroke, POAD, n (%)           |                    | 47 (0.9)               | 38 (0.7)               |

**Table 2.** Prevalence of hypertension, and awareness based on the first visit (visit 1), the second visit (visit 2), or both visits to the 10242 study participants

|                       | Hypertension     |                  |                  |       | Awareness among hypertensive subjects |                  |                  |       |
|-----------------------|------------------|------------------|------------------|-------|---------------------------------------|------------------|------------------|-------|
|                       | Visit 1          | Visit 2          | Both             | Δ     | Visit 1                               | Visit 2          | Both             | Δ     |
| <b>Men (n=5063)</b>   |                  |                  |                  |       |                                       |                  |                  |       |
| Age decades, n (%)    |                  |                  |                  |       |                                       |                  |                  |       |
| 15–24 years           | 48 (4.7)         | 42 (4.2)         | 15 (1.5)         | -68.1 | 4 (8.3)                               | 4 (9.5)          | 4 (26.7)         | 220.0 |
| 25–34 years           | 82 (8.0)         | 68 (6.7)         | 41 (4.0)         | -50.0 | 13 (15.9)                             | 13 (19.1)        | 13 (31.7)        | 100.0 |
| 35–44 years           | 142 (14.1)       | 101 (10.0)       | 73 (7.2)         | -48.6 | 20 (14.1)                             | 20 (19.8)        | 20 (27.4)        | 94.5  |
| 45–54 years           | 263 (26.6)       | 234 (23.7)       | 188 (19.0)       | -28.7 | 85 (32.3)                             | 85 (36.3)        | 85 (45.2)        | 39.9  |
| 55–69 years           | 375 (36.5)       | 315 (30.6)       | 272 (26.4)       | -27.5 | 118 (31.5)                            | 118 (37.5)       | 118 (43.4)       | 37.9  |
| Prevalence, % (95%CI) |                  |                  |                  |       |                                       |                  |                  |       |
| Crude                 | 18.0 (16.9-19.1) | 15.0 (14.0-16.0) | 11.6 (10.8-12.5) | -35.3 | 26.4 (23.7-29.4)                      | 31.3 (28.1-34.7) | 39.9 (36.0-43.9) | 54.5  |
| Age standardized*     | 16.2 (15.1-17.3) | 13.5 (12.5-14.4) | 10.2 (9.4-11.0)  | -37.0 | -                                     | -                | -                | -     |
| <b>Women (n=5179)</b> |                  |                  |                  |       |                                       |                  |                  |       |
| Age decades, n (%)    |                  |                  |                  |       |                                       |                  |                  |       |
| 15–24 years           | 56 (5.3)         | 40 (3.8)         | 17 (1.6)         | -69.7 | 1 (1.8)                               | 1 (2.5)          | 1 (5.9)          | 229.4 |
| 25–34 years           | 97 (9.3)         | 68 (6.5)         | 46 (4.4)         | -52.6 | 16 (16.5)                             | 16 (23.5)        | 16 (34.8)        | 110.9 |

1  
2  
3  
4  
5  
6  
7  
8  
9  
10  
11  
12  
13  
14  
15  
16  
17  
18  
19  
20  
21  
22  
23  
24  
25  
26  
27  
28  
29  
30  
31  
32  
33  
34  
35  
36  
37  
38  
39  
40  
41  
42  
43  
44  
45  
46  
47  
48  
49

|                       |                  |                  |                  |       |                  |                  |                  |      |
|-----------------------|------------------|------------------|------------------|-------|------------------|------------------|------------------|------|
| 35–44 years           | 163 (16.0)       | 136 (13.4)       | 105 (10.3)       | -35.6 | 54 (33.1)        | 54 (39.7)        | 54 (51.4)        | 55.2 |
| 45–54 years           | 371 (35.1)       | 325 (30.8)       | 285 (27.0)       | -23.2 | 138 (37.2)       | 138 (42.5)       | 138 (48.4)       | 30.2 |
| 55–69 years           | 356 (35.7)       | 297 (29.8)       | 265 (26.6)       | -25.6 | 133 (37.4)       | 133 (44.8)       | 133 (50.2)       | 34.3 |
| Prevalence, % (95%CI) |                  |                  |                  |       |                  |                  |                  |      |
| Crude                 | 20.1 (19.1-21.2) | 16.7 (15.7-17.8) | 13.9 (12.9-14.8) | -31.2 | 33.8 (31.0-36.8) | 39.8 (36.6-43.1) | 46.9 (43.3-50.6) | 45.3 |
| Age standardized*     | 18.3 (17.2-19.4) | 15.1 (14.1-16.1) | 12.3 (11.4-13.2) | -32.8 | -                | -                | -                | -    |

Δ = (percentage based on visit 1 – percentage based on both visits)/ percentage based on visit 1

\* to the WHO standard population 2001



**Table 3.** Prevalence of treatment and control based on the first visit (visit 1), the second visit (visit 2), or both visits to the 10242 study participants.

|                       | Current treatment among hypertensive subjects |                  |                  |       | BP control among treated subjects |                  |                  |       |
|-----------------------|-----------------------------------------------|------------------|------------------|-------|-----------------------------------|------------------|------------------|-------|
|                       | Visit 1                                       | Visit 2          | Both             | Δ     | Visit 1                           | Visit 2          | Both             | Δ     |
| <b>Men (n=5063)</b>   |                                               |                  |                  |       |                                   |                  |                  |       |
| Age decades, n (%)    |                                               |                  |                  |       |                                   |                  |                  |       |
| 15–24 years           | 3 (6.3)                                       | 3 (7.1)          | 3 (20.0)         | 220.0 | 1 (33.3)                          | 1 (33.3)         | 1 (33.3)         | -     |
| 25–34 years           | 10 (12.2)                                     | 10 (14.7)        | 10 (24.4)        | 100.0 | 3 (30.0)                          | 2 (20.0)         | 0 (0.0)          | -     |
| 35–44 years           | 17 (12.0)                                     | 17 (16.8)        | 17 (23.3)        | 94.5  | 7 (41.2)                          | 9 (52.9)         | 7 (41.2)         | -     |
| 45–54 years           | 73 (27.8)                                     | 73 (31.2)        | 73 (38.8)        | 39.9  | 19 (26.0)                         | 23 (31.5)        | 14 (19.2)        | -26.3 |
| 55–69 years           | 112 (29.9)                                    | 112 (35.6)       | 112 (41.2)       | 37.9  | 19 (17.0)                         | 33 (29.5)        | 15 (13.4)        | -21.1 |
| Prevalence, % (95%CI) |                                               |                  |                  |       |                                   |                  |                  |       |
| Crude                 | 23.6 (20.9-26.5)                              | 28.3 (25.2-31.6) | 36.5 (32.7-40.5) | 54.5  | 22.8 (17.7-28.8)                  | 31.6 (25.8-38.1) | 17.2 (12.8-22.6) | -24.5 |
| <b>Women (n=5179)</b> |                                               |                  |                  |       |                                   |                  |                  |       |
| Age decades, n (%)    |                                               |                  |                  |       |                                   |                  |                  |       |
| 15–24 years           | 1 (1.8)                                       | 1 (2.5)          | 1 (5.9)          | 229.4 | 0 (0.0)                           | 0 (0.0)          | 0 (0.0)          | -     |
| 25–34 years           | 13 (13.4)                                     | 13 (19.1)        | 13 (28.3)        | 110.9 | 8 (61.5)                          | 9 (69.2)         | 6 (46.2)         | -25.0 |
| 35–44 years           | 50 (30.7)                                     | 50 (36.8)        | 50 (47.6)        | 55.2  | 27 (54.0)                         | 29 (58.0)        | 22 (44.0)        | -18.5 |

1  
2  
3  
4  
5  
6  
7  
8  
9  
10  
11  
12  
13  
14  
15  
16  
17  
18  
19  
20  
21  
22  
23  
24  
25  
26  
27  
28  
29  
30  
31  
32  
33  
34  
35  
36  
37  
38  
39  
40  
41  
42  
43  
44  
45  
46  
47  
48  
49

|                       |                  |                  |                  |      |                  |                  |                  |       |
|-----------------------|------------------|------------------|------------------|------|------------------|------------------|------------------|-------|
| 45–54 years           | 124 (33.4)       | 124 (38.2)       | 124 (43.5)       | 30.2 | 36 (29.0)        | 47 (37.9)        | 31 (25.0)        | -13.9 |
| 55–69 years           | 125 (35.1)       | 125 (42.1)       | 125 (47.2)       | 34.3 | 38 (30.4)        | 41 (32.8)        | 31 (24.8)        | -18.4 |
| Prevalence, % (95%CI) |                  |                  |                  |      |                  |                  |                  |       |
| Crude                 | 30.0 (27.3-32.9) | 36.1 (33.0-39.4) | 43.6 (40.0-47.2) | 45.3 | 34.8 (29.7-40.2) | 40.3 (35.0-45.7) | 28.7 (24.0-34.0) | -17.4 |

Δ = (percentage based on visit 1 – percentage based on both visits)/ percentage based on visit 1

For peer review only

**Table 4.** Rates of proteinuria and self-reported CV disease in HYDY participants found to be hypertensive at visit 1, at visit 2, or at both visits, in subjects finally excluded from the final diagnosis of hypertension (not confirmed), in normotensive subjects and in all participants.

| Diagnosis               | Subjects | DIPSTIK test $\geq 1+$ |                   | Self-report of CV disease |                  |
|-------------------------|----------|------------------------|-------------------|---------------------------|------------------|
|                         | n        | n                      | % (95% CI)        | n                         | % (95% CI)       |
| Hypertension at Visit 1 | 1938     | 153                    | 7.9 (6.8 to 9.2)  | 58                        | 3.0 (2.3 to 3.8) |
| Hypertension at Visit 2 | 1614     | 141                    | 8.7 (7.5 to 10.2) | 55                        | 3.4 (2.6 to 4.4) |
| Hypertension at both    | 1296     | 123                    | 9.5 (8.0 to 11.2) | 53                        | 4.1 (3.1 to 5.3) |
| Not confirmed           | 959      | 48                     | 5.0 (3.8 to 6.6)  | 7                         | 0.7 (0.0 to 1.5) |
| Normotensives           | 7769     | 438                    | 5.6 (5.1 to 6.2)  | 25                        | 0.3 (0.2 to 0.5) |
| All participants        | 10025    | 609                    | 6.1 (5.6 to 6.6)  | 85                        | 0.8 (0.7 to 1.0) |

**Table 5.**

CV risk distribution among the 9926 adult subjects investigated in the HYDY study based on the results first visit (visit 1), or both visits.

| Risk Categories | After Visit 1 |            |                            | After two visits |            |                            | $\Delta$<br>n= |
|-----------------|---------------|------------|----------------------------|------------------|------------|----------------------------|----------------|
|                 | n=            | Crude<br>% | Age weighted<br>% (95% CI) | n=               | Crude<br>% | Age weighted<br>% (95% CI) |                |
| Average risk    | 2246          | 22.6       | 30.3 (28.9 to 31.6)        | 2326             | 23.4       | 31.3 (29.9 to 32.7)        | 128851         |
| Low risk        | 3387          | 34.1       | 33.7 (32.4 to 35.0)        | 3495             | 35.2       | 34.1 (32.8 to 35.4)        | 48207          |
| Moderate risk   | 2234          | 22.5       | 20.3 (19.3 to 21.3)        | 2281             | 23.0       | 20.7 (19.7 to 21.7)        | 52613          |
| High risk       | 1206          | 12.1       | 8.2 (7.7 to 8.7)           | 1033             | 10.4       | 6.6 (6.1 to 7.1)           | -190741        |
| Very high risk  | 853           | 8.6        | 7.5 (6.9 to 8.1)           | 792              | 8.0        | 7.2 (6.6 to 7.8)           | -36523         |

$\Delta$  = estimated difference between Yemen subjects attributed to the risk category on the basis of BP measurements taken at the first visit and those attributed to the same class on the basis of average of BP measurements taken at both visits (subjects allocated at Visit 1 – subjects allocated after two visits).

## Legends to Figures

### Figure 1.

Diagnosis of hypertension (systolic blood pressure  $\geq 140$  mm Hg and/or diastolic blood pressure  $\geq 90$  mm Hg and/or self-reported use of antihypertensive drugs at the time of the interview) performed on the basis of measurements taken at the first visit (visit 1), at the second visit (visit 2), or both. The number of subjects with and without the condition and age-weighted rates (to the 15-69 years Yemen population) are reported.

### Figure 2.

Factors associated with the misclassification of hypertension diagnosis (systolic blood pressure  $\geq 140$  mm Hg and/or diastolic blood pressure  $\geq 90$  mm Hg at both visits) at multiple logistic regression analysis including only non-treated subjects (n=1396). Results are expressed as odd ratio (OR) with 95% CI.

### Figure 3.

Blood pressure and CV risk stratification of HYDY participants according to the ESH/ESC chart using average blood pressure values at visit1 and at both visits.

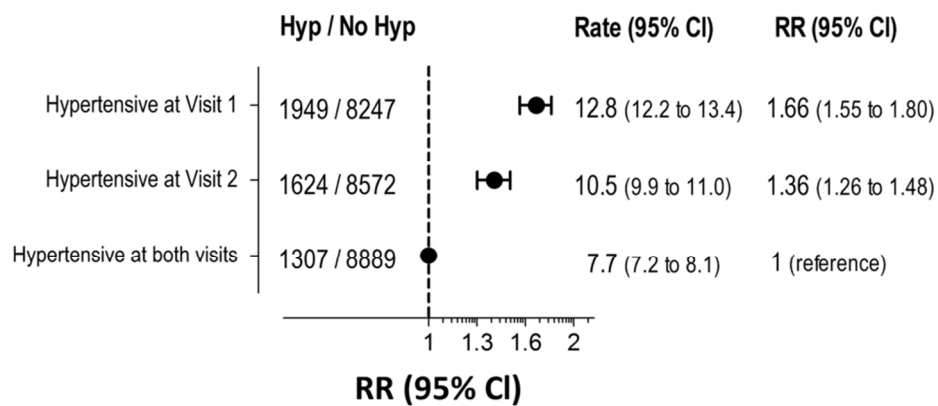

Diagnosis of hypertension (systolic blood pressure  $\geq 140$  mm Hg and/or diastolic blood pressure  $\geq 90$  mm Hg and/or self-reported use of antihypertensive drugs at the time of the interview) performed on the basis of measurements taken at the first visit (visit 1), at the second visit (visit 2), or both. The number of subjects with and without the condition and age-weighted rates (to the 15-69 years Yemen population) are reported.  
87x41mm (300 x 300 DPI)

review only

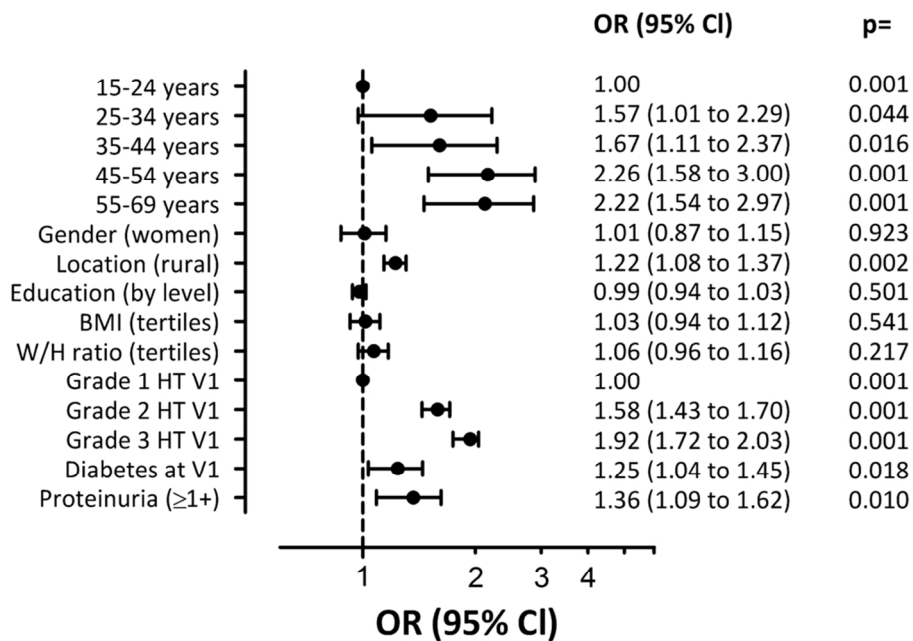

Factors associated with the misclassification of hypertension diagnosis (systolic blood pressure  $\geq 140$  mm Hg and/or diastolic blood pressure  $\geq 90$  mm Hg at both visits) at multiple logistic regression analysis including only non-treated subjects (n=1396). Results are expressed as odd ratio (OR) with 95% CI.  
100x68mm (300 x 300 DPI)

1  
2  
3  
4  
5  
6  
7  
8  
9  
10  
11  
12  
13  
14  
15  
16  
17  
18  
19  
20  
21  
22  
23  
24  
25  
26  
27  
28  
29  
30  
31  
32  
33  
34  
35  
36  
37  
38  
39  
40  
41  
42  
43  
44  
45  
46  
47  
48  
49  
50  
51  
52  
53  
54  
55  
56  
57  
58  
59  
60

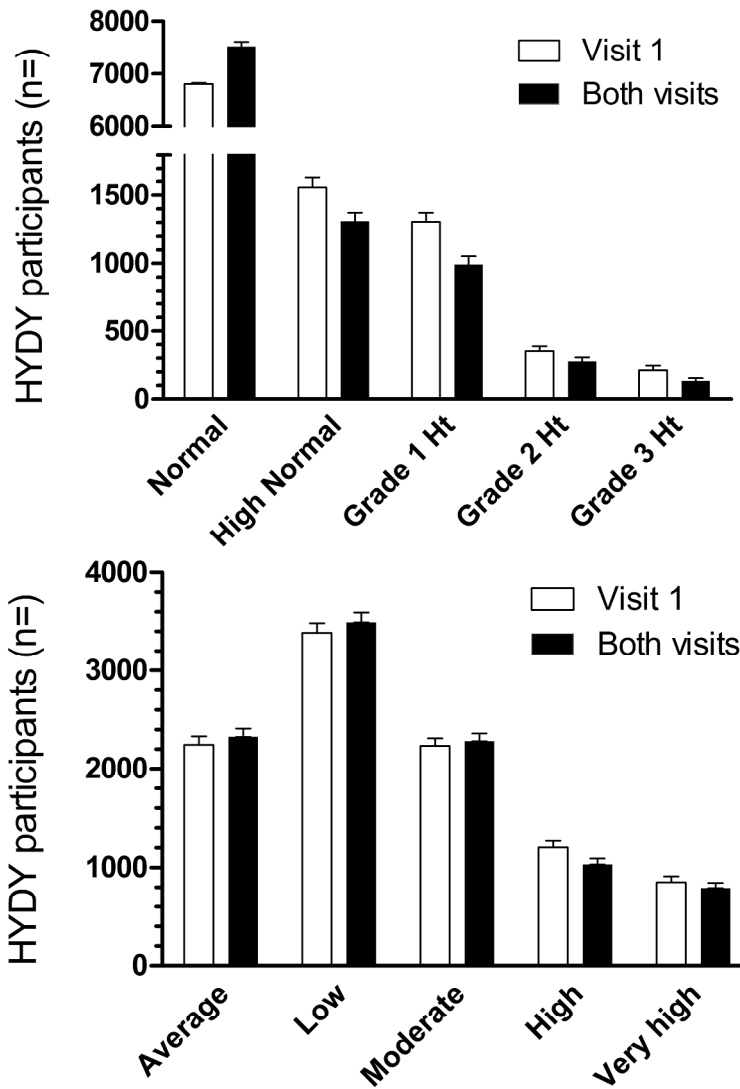

Blood pressure and CV risk stratification of HYDY participants according to the ESH/ESC chart using average blood pressure values at visit1 and at both visits.  
248x357mm (300 x 300 DPI)
